# Supplementary material
Source: Royal Society of Chemistry journal article supplement (doi:10.1039/d5su00853k)
Supplement: d5su00853k1.pdf [file d5su00853k1.pdf]

Supporting Information:

Analysis of Carbon Capture Strategies for Refineries Considering Extraordinary  
Future Economic and Policy Uncertainties

Fang Li<sup>a</sup>, Liang Jing<sup>b</sup>, Sean McCoy<sup>a</sup>, Sara Hastings-Simon<sup>c</sup> and Joule Bergerson<sup>\*1a</sup>

<sup>a</sup> Department of Chemical and Petroleum Engineering, University of Calgary, 2500 University  
Drive NW, Calgary, Alberta, Canada T2N 1N4

<sup>b</sup> Energy Traceability Technology, Technology Strategy & Planning Department, Saudi Aramco,  
Dhahran, Saudi Arabia 34465

<sup>c</sup> Department of Earth, Energy, and Environment, University of Calgary, 2500 University Drive  
NW, Calgary, Alberta, Canada T2N 1N4

---

\*corresponding author: [jbergers@ucalgary.ca](mailto:jbergers@ucalgary.ca)

## Table of Contents

|                                                                                                                                                                                     |    |
|-------------------------------------------------------------------------------------------------------------------------------------------------------------------------------------|----|
| Supplementary Method 1 – PRELIM and Carbon Capture Module .....                                                                                                                     | 1  |
| PRELIM Introduction. ....                                                                                                                                                           | 1  |
| Carbon Capture Module. ....                                                                                                                                                         | 1  |
| General Computing Process for the Carbon Capture Module.....                                                                                                                        | 2  |
| Supplementary Method 2 - Refinery Product Slates, Crude Proxies, Configurational Crude input<br>and Cost Analysis under Different Future Transportation Fuel Demand Scenarios ..... | 3  |
| Refinery Product Slates.....                                                                                                                                                        | 3  |
| Blending Crude Proxies.....                                                                                                                                                         | 4  |
| Configurational Crude input.....                                                                                                                                                    | 6  |
| CO <sub>2</sub> Avoidance Cost Analysis. ....                                                                                                                                       | 10 |
| Supplementary Method 3 - Real Option Analysis .....                                                                                                                                 | 13 |
| Probability of Individual Refinery's Strategic Options. ....                                                                                                                        | 13 |
| Sensitivity Analysis on Probability of Individual Refinery's Strategic Options. ....                                                                                                | 17 |
| Expected Total GHG Emissions & Refinery Production.....                                                                                                                             | 17 |
| Supplemental Result 1 – Product Slates, Crude Qualities and Crude Input for U.S. Refineries ...                                                                                     | 18 |
| Estimated U.S. Regional Volume of Production for Different Refinery Products under Different<br>Transportation Fuel Demand Scenarios.....                                           | 18 |
| Estimated U.S. Crude Input Qualities.....                                                                                                                                           | 19 |
| Estimated U.S. Configurational Crude input.....                                                                                                                                     | 19 |
| Supplemental Result 2 – GHG Emissions from U.S. Refineries.....                                                                                                                     | 20 |
| U.S. Refining Sector GHG Emissions/Energy Consumption Baseline in 2019. ....                                                                                                        | 20 |
| U.S. Refining Sector GHG Emissions under Different Transportation Fuel Demand Scenarios.<br>.....                                                                                   | 21 |
| Supplementary Result 3 - CO <sub>2</sub> Avoidance Costs for Different Carbon Capture Strategies. ....                                                                              | 22 |
| Supplementary Result 4 - Additional Results for Real Option Analysis.....                                                                                                           | 23 |
| Expected Total GHG Emissions by Selected Refinery Configurations. ....                                                                                                              | 23 |
| Figures.....                                                                                                                                                                        | 25 |
| Tables .....                                                                                                                                                                        | 45 |
| Datasets.....                                                                                                                                                                       | 59 |
| SI References .....                                                                                                                                                                 | 60 |

## List of Figures

|                                                                                                                                                                                              |    |
|----------------------------------------------------------------------------------------------------------------------------------------------------------------------------------------------|----|
| Figure S1. PRELIM and Carbon Capture Module.....                                                                                                                                             | 32 |
| Figure S2. Projected Crude Qualities Using ETS .....                                                                                                                                         | 32 |
| Figure S3. Projected U.S. Refinery Product Slates under Different Transportation Fuel Demand Scenarios.<br>.....                                                                             | 33 |
| Figure S4. Estimated Future U.S. Refineries Crude input Changes. a) Light/Sweet Crude; b) Heavy/Sour<br>Crude. ....                                                                          | 34 |
| Figure S5. Estimated Annual U.S. Refineries GHG Emissions based on Different Decarbonization Goals...35                                                                                      |    |
| Figure S6. Annual Estimated GHG Emissions for U.S. Refining Sector under Different Refining Product<br>Demands.....                                                                          | 36 |
| Figure S7. Estimated Annual GHG Emissions by Direct Combustion of Transportation Fuels and Crude<br>Extraction and Transportation under Different Fuel Demand Scenarios. ....                | 38 |
| Figure S8. Breakdown of Estimated Annual GHG Emissions by Direct Combustion of Transportation Fuels<br>under Different Fuel Demand Scenarios.....                                            | 39 |
| Figure S9. Sensitivity Analysis on Real Option.....                                                                                                                                          | 40 |
| Figure S10. The General Computing Process for Carbon Capture Module .....                                                                                                                    | 41 |
| Figure S11. Projected Annual Transportation Fuel Demand in the U.S. from 2019 to 2050. ....                                                                                                  | 41 |
| Figure S12. Linear Correlations between Refinery Historical Input and Output .....                                                                                                           | 42 |
| Figure S13. Simulated Carbon Price Following a GBM Process .....                                                                                                                             | 43 |
| Figure S14. An Established Binomial Decision Tree for a Specific Carbon Price Trajectory.....                                                                                                | 44 |
| Figure S15. 2019 U.S Refining Sector Emission & Energy Consumption Profile.....                                                                                                              | 45 |
| Figure S16. Projection on Refinery Emissions Intensity under Various Transportation Fuel Demand and<br>Different Crude Qualities.....                                                        | 46 |
| Figure S17. CO <sub>2</sub> Avoidance Cost Curve for Heavy/Sour Crudes.....                                                                                                                  | 47 |
| Figure S18. CO <sub>2</sub> Avoidance Cost Curve for Light/Sweet Crudes.....                                                                                                                 | 48 |
| Figure S19. Distribution of CO <sub>2</sub> Avoidance Cost across Refinery Configurations for Heavy/Sour Crudes .....                                                                        | 49 |
| Figure S20. Distribution of CO <sub>2</sub> Avoidance Cost across Refinery Configurations for Light/Sweet Crudes .....                                                                       | 50 |
| Figure S21. Expected U.S. GHG Emissions by Selected Refinery Configurations based on Likelihoods of<br>Different Strategic Options.....                                                      | 51 |
| Figure S22. Expected U.S Refinery Production by Selected Refinery Configurations based on Likelihoods of<br>Different Options. ....                                                          | 52 |
| Figure S23. Sensitivity of CO <sub>2</sub> Avoidance Costs to Variations in Absorber and Stripper Heights (50%, 100%,<br>and 150% of the Reference Case Dimensions).....                     | 53 |
| Figure S24. Distribution of CO <sub>2</sub> Avoidance Cost for Carbon Capture on Different SMR Streams for U.S.<br>Refineries.....                                                           | 54 |
| Figure S25. Likelihood of Three Choices Using Real Options Analysis for Three Refinery Types under Three<br>Transportation Fuel Demand Scenarios for Anticipated Carbon Price Scenario. .... | 55 |
| Figure S26. Likelihood of Three Choices Using Real Options Analysis for Three Refinery Types under Three<br>Transportation Fuel Demand Scenarios for Deferred Carbon Price Scenario.....     | 56 |

List of Tables

|                                                                                                                                                     |    |
|-----------------------------------------------------------------------------------------------------------------------------------------------------|----|
| Table S1. PRELIM Specified Refinery Configurations.....                                                                                             | 55 |
| Table S2. EIA (13) Reported Historical Contribution of Fuel to Demand. ....                                                                         | 55 |
| Table S3. The proportion of locally produced transportation fuel to total fuel supplies .....                                                       | 55 |
| Table S4. Target Crude Input Qualities for Each PADD.....                                                                                           | 56 |
| Table S5. SRCI for Individual Refinery.....                                                                                                         | 56 |
| Table S6. Constants and Coefficients for the Multi-linear Regression Model.....                                                                     | 56 |
| Table S7. Assumed Key Performance Indicator (KPI) for CapEx.....                                                                                    | 57 |
| Table S8. Assumed KPI for OpEx.....                                                                                                                 | 57 |
| Table S9. Crude Input and Product Yields for Selected Individual Refineries in 2019, 2035 and 2050.....                                             | 58 |
| Table S10. Description of Different Fuel Demand Scenarios and the Corresponding Electrification Scenarios Taking from EFS(11). ....                 | 59 |
| Table S11. Changes in Refinery Product Production and Supply by PADD Region (HD35 to HD50 Scenario) .....                                           | 59 |
| Table S12. PRELIM Estimated Volume-weighted Average Emissions Intensities of Different Process Unit in U.S. Refineries .....                        | 60 |
| Table S13. Estimated U.S. GHG Emissions with or without Carbon Capture under Different Fuel Demand Scenarios .....                                  | 61 |
| Table S14. Post-Combustion Capture Unit’s Specific Reboiler Duties and Electricity Consumptions for Various Gas Flows in Carbon Capture Module..... | 62 |
| Table S15. Location Factor for Each PADD.....                                                                                                       | 62 |
| Table S16. Variables Considered for Real Option Analysis.....                                                                                       | 62 |
| Table S17. List of Captured Individual and Combination of Process Units .....                                                                       | 62 |
| Table S18. CO <sub>2</sub> Compression Unit Utility Consumption Estimation (10) .....                                                               | 63 |
| Table S19. SCF for Individual Process Units (21).....                                                                                               | 64 |
| Table S20. Regression Coefficient for the Linear Regression Model between Regional Refinery Output and Input. ....                                  | 64 |
| Table S21. Mean refinery crude input historical change for different refinery configurations.....                                                   | 64 |
| Table S22. Background Information on the Reference Carbon Capture Configuration .....                                                               | 65 |
| Table S23. Equipment List for Reference Carbon Capture Configuration (2).....                                                                       | 65 |
| Table S24. Selected Equipment Cost for Common Plant .....                                                                                           | 66 |
| Table S25. Equipment Cost Comparison between the Reference Configuration and Literature Data (2019) .....                                           | 67 |
| Table S26. Equipment Cost Estimation Parameters (2).....                                                                                            | 67 |
| Table S27. Extrapolated Chemical Engineering Plant Cost Index (CEPCI) (51) .....                                                                    | 67 |
| Table S28. Parameters for Carbon Prices Generation from McKeller (52). ....                                                                         | 68 |
| Table S30. Maximum, Minimum and Average Values for Simulated Carbon Price Trajectories.....                                                         | 68 |
| Table S31. Summary of Individual Refinery Operational Changes Since 1999 .....                                                                      | 69 |
| Table S32. Estimated Annual GHG Emissions by Direct Combustion of Transportation Fuels .....                                                        | 69 |
| Table S33. CO <sub>2</sub> Avoidance Cost Range for Carbon Capture on Different Locations from SMR .....                                            | 69 |

## 1 **Supplementary Method 1 – PRELIM and Carbon Capture Module**

### 2 **PRELIM Introduction**

3 The Petroleum Refinery Lifecycle Inventory Model (PRELIM) is a Microsoft Excel based inventory  
4 model to evaluate the gate-to-gate environmental impact of refineries' operations. PRELIM version  
5 1.6 (1) is employed in this study to evaluate the energy consumption and greenhouse gas (GHG)  
6 emissions of the U.S. refining sector. PRELIM v1.6 is currently capable of simulating three types of  
7 refineries: hydroskimming, medium conversion, and deep conversion refineries. For the medium  
8 conversion and deep conversion refineries, three combinations of process units are available for  
9 each. In contrast, only one combination is available for the hydroskimming refinery, as detailed in  
10 Table S1

11 PRELIM considers different types of crude that a refinery process, which influences the throughputs  
12 of various process units, thereby affecting the energy consumption and GHG emissions of the  
13 entire refinery. PRELIM necessitates a specific format for the crude assay, which must include  
14 detailed information such as crude qualities (e.g., API (American Petroleum Institute) gravity, sulfur  
15 content by weight percentage), and the distribution of crude components based on distillation  
16 temperature (i.e., true boiling point (TBP) distribution). Currently, PRELIM v1.6 stores over 600  
17 crude assays from oilfields across the world based on public or industrial data.

18 The production of a variety of refinery products (17 products) could be simulated by PRELIM v1.6.  
19 However, only a subset of these products is simulated in this work due to the lack of data, including  
20 blended gasoline, jet fuel or aviation turbine fuel (Jet-A/AVT), ultra-low sulfur diesel (ULSD), fuel  
21 oil, coke, liquid heavy ends (LHE), liquified petroleum gas (LPG) and lubricants (Lube).

22 By selecting the refinery configuration, inputting crude assays, and specifying target product slates  
23 (i.e., the composition of different refinery products), PRELIM adjusts the material flows between  
24 process units. It aligns actual product slates with target slates using an embedded linear  
25 programming optimization tool. This approach enables the derivation of an energy consumption  
26 profile and GHG emissions that more accurately reflect real refinery operations.

### 27 **Carbon Capture Module**

28 In this study, a carbon capture module based on PRELIM framework is further developed to  
29 evaluate the GHG emissions reduction potential and the economic performance for capturing CO<sub>2</sub>  
30 from various refinery's process units. A list of individual and combination of process units that are  
31 considered for capture is listed in Table S17.

32 The carbon capture module applies a point-to-point post-combustion capture strategy, which  
33 includes individual absorbers that are assigned to those individual furnaces/boilers, a common  
34 regenerator and a common compressor. The captured CO<sub>2</sub> is highly purified (i.e., 99.5%) and

35 compressed (i.e., 2220 psia), making it ready for transportation. However, CO<sub>2</sub> transportation and  
 36 storage phase are not included in the carbon capture module, as shown in Figure S1.  
 37 CO<sub>2</sub> concentrations in different exhausted gas streams are calculated based on fuel composition,  
 38 which are either extracted from literature (2–9) (i.e., natural gas, internal liquid fuel, coke, tail gas  
 39 from hydrogen purification unit – pressure swing adsorption (PSA) - of steam methane reformer  
 40 (SMR)) or fed with industrial data (i.e., refinery fuel gas) and stored in the carbon capture module.  
 41 The specific electricity and steam consumption for capturing CO<sub>2</sub> from different gas streams with  
 42 different CO<sub>2</sub> concentrations are presented in Table S14.  
 43 The carbon capture module considers a multi-stage centrifugal CO<sub>2</sub> compression with inter-stage  
 44 cooling for dehydration. For each stage of compression, the polytropic head for CO<sub>2</sub> compression  
 45 is calculated based on the equation Eq. S1 extracted from the literature (10).

$$W^{real\ gas} = H_R^{real\ gas} = \frac{H_p^{real\ gas}}{\eta_p} \approx \left[ \frac{8.314}{MolWt} \right] \left[ \frac{n}{n-1} \right] \frac{T_s Z_{avg}}{\eta_p} \left[ \left( \frac{P_d}{P_s} \right)^{\frac{n-1}{n}} - 1 \right] \quad \text{Eq. S1}$$

46 Where,  $W^{real\ gas}$  is the polytropic work for compressing the CO<sub>2</sub> gas,  $H_R^{real\ gas}$  is the actual head  
 47 required for CO<sub>2</sub> compression,  $H_p^{real\ gas}$  is the polytropic head required for CO<sub>2</sub> compression,  $\eta_p$  is  
 48 the polytropic efficiency,  $MolWt$  is the molecular weight of CO<sub>2</sub>,  $n$  is the polytropic exponent,  $T_s$  is  
 49 the temperature at the compressor inlet,  $Z_{avg}$  is the average of the gas compressibility at the suction  
 50 and discharge conditions,  $P_d$  and  $P_s$  are the pressure of CO<sub>2</sub> at discharge and suction conditions.  
 51 The polytropic exponent could be calculated by Eq. S2 as follows:

$$n = \frac{\ln\left(\frac{P_d}{P_s}\right)}{\ln\left(\frac{Z_s T_s P_d}{Z_d T_d P_s}\right)} \quad \text{Eq. S2}$$

52  
 53 Where,  $Z_s$  and  $Z_d$  are the gas compressibilities at the suction and discharge conditions,  $T_s$  and  $T_d$   
 54 are the gas temperatures at the suction and discharge conditions.  
 55 Table S18 summarizes all the parameters and the calculated polytropic work for CO<sub>2</sub> compression  
 56 in each stage.

## 57 **General Computing Process for the Carbon Capture Module**

58 Figure S10 depicts how the carbon capture module calculating process is integrated into PRELIM.  
 59 A detailed description of the computing process is presented below.  
 60 Step 1: PRELIM will first calculate the GHG emissions and energy consumption baseline for  
 61 individual process units to adapt the designated product slate.  
 62 Step 2: Deciding if carbon capture is deployed for individual units. If not, the emission/energy  
 63 baseline will be used to calculate the final results for the entire refinery process & products.

64 Step 3: If carbon capture is deployed for selected units, the carbon capture module then calculates  
65 a new emissions profile for each unit based on the CO<sub>2</sub> content in the flue gas flow. Moreover, the  
66 energy consumption for the carbon capture & compression unit will be calculated based on the total  
67 amount of CO<sub>2</sub> captured in the process. The energy consumption for capturing and compressing  
68 CO<sub>2</sub> is allocated to each unit on a mass basis.

69 Step 4: Once the total emissions and energy consumption is determined for the entire refinery  
70 process, new emissions factors are generated for different energy sources (such as natural gas  
71 heat, refinery fuel gas heat, steam, etc.) and units (including fluid catalytic cracker (FCC), residue  
72 fluid catalytic cracker (RFCC), SMR, etc.). The newly generated values replace the default  
73 emissions factors and energy consumption in PRELIM for energy sources and individual units, and  
74 the emissions intensity for refinery processes and products is thus determined.

## 75 **Supplementary Method 2 - Refinery Product Slates, Crude Proxies,** 76 **Configurational Crude Input and Cost Analysis under Different Future** 77 **Transportation Fuel Demand Scenarios**

### 78 **Refinery Product Slates**

79 The National Renewable Energy Laboratory's Electrification Future Study (NREL's EFS)(11) has  
80 modelled the future transportation fuel demands for the U.S. based on different EV adoption rate  
81 scenarios (see detailed description for each scenario in Table S10 and the estimated amount of  
82 transportation fuel in Figure S11). We selected 2019 as our baseline year and two other specific  
83 years – 2035 and 2050 – as critical timestamps.

84 In order to estimate the future production of refinery products in the U.S, it is essential to consider  
85 the anticipated fuel demand for the transportation sector. A computation procedure similar to Kim  
86 (12) is established to formulate the expected refinery product slates, which is detailed stepwise  
87 below.

88 Step 1. Determine the future demand for selected refinery products based on EFS. As mentioned  
89 in the previous section (Supplementary method 1), a subset of refinery products is considered in  
90 this study, including blended gasoline, Jet-A/AVT, ULSD, fuel oil, coke, LHE, LPG and Lube. EFS  
91 provided future demands data for multiple refinery products, including diesel, gasoline, jet fuel,  
92 LPG, lubricants and residual fuel oil from the transportation sector. However, these products are  
93 not necessarily all consumed by the transportation sector. For example, 77% diesel produced by  
94 the refining sector is consumed by transportation sector, the rest is either consumed by industrial  
95 sector (14%) or residential, commercial, power generation purposes (9%)(13). Assuming the  
96 consumption proportions for each transportation fuel (i.e., gasoline, jet fuel, diesel) remain constant,  
97 we can readily estimate the total future supply of these fuels in the U.S. market. Additionally, fuel  
98 oil (i.e., heating oil) and diesel, both categorized as distillate fuel oils, are closely related. The EIA  
99 has documented the historical ratio of total fuel oil supplied to total diesel supplied, allowing for an  
100 estimation of total supplied fuel oil once the diesel figures are known. Likewise, LHE, also known

101 as residual fuel oil, predominantly used by marine vessels and not suitable for direct combustion in  
 102 vehicles or jet engines, has its consumption in the transportation sector documented historically by  
 103 the EIA. This data facilitates the estimation of the total LHE supplied in the U.S. market. Although  
 104 coke is not directly modeled by EFS, it is considered a critical part of the product slate as it  
 105 represents the heavier fractions of crude that cannot be converted into transportation fuels. The  
 106 total supplied coke can be calculated from its average proportion of total refinery products over  
 107 time, a figure also documented by the EIA. The historical contribution of fuel to supply listed above  
 108 is summarized and presented in Table S2.

109 Step 2. Determine the amount of refinery products that are produced by local refinery. It is apparent  
 110 that the U.S. domestic fuel market does not follow a localization pattern – understood here is the  
 111 practice of producing goods locally and then consuming them within the same geographic area.  
 112 For example, there are 1.22 Gbbl/y of gasoline supplied to PADD 1 in 2019 while there is only 95  
 113 mmbbl/y of gasoline that are locally produced in the same area. To determine the product slate of  
 114 a refinery for future transportation fuel demand scenarios, it is essential to ascertain the quantity of  
 115 locally produced refinery products. The amount of a specific fuel produced locally should equate to  
 116 the total supply of that fuel, adjusted by the net movement (i.e., exports minus imports) and any  
 117 change in stock levels. To incorporate historical trends in local production, we assume that the  
 118 arithmetic average of the ratio of locally produced fuel volume to total fuel supply over a given time  
 119 interval will remain constant in the future. Therefore, the volume of locally produced specific fuel  
 120 can be calculated based on this assumption, as shown in Eq. S3 and Eq. S4. Table S3 summarizes  
 121 the proportion of locally produced refinery products to total fuel supplies.

122

$$\varphi_{local\ produced} = \frac{1}{m} \sum_1^m \left[ \frac{(Q_{total\ supplied}^{hist} - Q_{import}^{hist} + Q_{export}^{hist} - Q_{stock\ change}^{hist})}{Q_{total\ supplied}^{hist}} \right] \quad \text{Eq. S3}$$

$$Q_{local\ produced}^{future} = Q_{total\ supplied}^{future} \times \varphi_{local\ produced} \quad \text{Eq. S4}$$

123 Where,  $\varphi_{local\ produced}$  is the arithmetic mean value of the historical contribution of locally produced  
 124 fuel to total fuel supplies,  $Q_{total\ supplied}^{hist}$ ,  $Q_{import}^{hist}$ ,  $Q_{export}^{hist}$  and  $Q_{stock\ change}^{hist}$  are EIA reported fuel volume  
 125 according to the applications on an annual basis,  $n$  is the total number of years being considered,  
 126  $Q_{local\ produced}^{future}$  denotes the future refinery produced transportation fuels by volume,  $Q_{total\ supplied}^{future}$   
 127 denotes the total supplied transportation fuels by volume.

128 Table S3 summarizes the calculated  $\varphi_{local\ produced}$  based on EIA's data.

129 Step 3. Repeat step 1 and 2 for other regions.

130

### 131 **Blending Crude Proxies.**

132 PRELIM requires user input on what type of crude that refineries will be processing in order to  
 133 determine the energy consumption and GHG emissions. And there are obvious regional differences

134 in terms of crude qualities across U.S. For example, the API gravities of crudes process by different  
 135 PADDs ranges from 28.6 to 35.5 while the average API for entire U.S. is 32.9. Cooney et al.(14)  
 136 developed a linear programming optimization method to assemble a crude proxy that matches the  
 137 projected API gravity and sulfur content by blending different crude assays stored in PRELIM  
 138 inventory. The same method is applied to formulate crude proxies that will be used in this study.  
 139 The procedure is described below.

140 Step 1. A business-as-usual (BAU) scenario for future crude qualities in each PADDs is  
 141 extrapolated using the exponential triple smoothing (ETS) forecasting function embedded in  
 142 Microsoft Excel, based on historical crude quality data reported by EIA(15). Two distinct scenarios  
 143 are contemplated for future projections: heavy versus light crude in relation to API gravity and sweet  
 144 versus sour crude concerning sulfur content, to assess potential variances in GHG emissions  
 145 resulting from the processing of different types of crude. The upper and lower bounds for the ETS  
 146 according to a chosen 95% projection interval are employed for these bifurcated scenarios. The  
 147 light crude scenario employs the upper bound of the fitted API gravity, while the sweet crude  
 148 scenario incorporates the lower bound of the fitted sulfur content. The opposite is true for the heavy  
 149 and sour crude scenarios. The projected API gravity & sulfur content for these two scenarios will  
 150 be served as targeted API and targeted sulfur in following steps.

151 Step 2. The U.S. refineries blend their own crude slates using both domestic and imported crudes.  
 152 The volume fraction as well as the qualities of imported crudes from different countries are  
 153 documented by EIA(16). Country level imported crude proxies could be assembled using the  
 154 objective function and the constraints developed by Cooney et al. (14), as shown in Eq. S5.

$$\text{Minimize: } f_0(\theta_i) = \left| \frac{\text{calculatedAPI}}{\text{targetAPI}} \right| \times 3.29 + \left| \frac{\text{calculatedSul}}{\text{targetSul}} - 1 \right| \quad \text{Eq. S5}$$

155 Where  $\theta_i$  is the volume fraction of crude assay  $i$  from a specific country.  $\text{targetAPI}$  and  
 156  $\text{targetSul}$  are projected API gravity and sulfur content from ETS, respectively.  $\text{calculatedAPI}$  and  
 157  $\text{calculatedSul}$  are volume weighted aggregated API gravity and sulfur content determined by  
 158 individual crude assays  $i$  and its volume fraction  $\theta_i$ , as shown in Eq. S6.

$$\begin{cases} \text{calculatedAPI} = \frac{141.5}{\sum_i (\text{SpGr}_{\text{crude } i} \times \theta_i)} - 131.5 \\ \text{calculatedSul} = \sum_i (\text{Sul}_{\text{crude } i} \times \theta_i) \end{cases} \quad \text{Eq. S6}$$

159 Two constraints are applied for the optimization, as shown in Eq. S7.

$$\begin{cases} \theta_i \leq 1 \\ \sum_i \theta_i = 1 \end{cases} \quad \text{Eq. S7}$$

160 Where,  $\text{SpGr}_{\text{crude } i}$  is the specific gravity of crude  $i$ .  $\text{Sul}_{\text{crude } i}$  is the sulfur content (wt%) of crude  $i$ .

161 Step 3. Assuming that crude qualities and volume fraction remain constant for imported crudes  
162 from 2019 onwards, the target domestic crude qualities could then be determined by subtracting  
163 volume-weighted API & sulfur content of imported crudes from projected API and sulfur. Once the  
164 target API and sulfur content is determined, the volume fraction of each domestic crude assays  
165 could be determined to blend a domestic crude proxy.

166 Step 4. Once country level crude proxies (including both imported and domestic crudes) are  
167 determined, we can apply the optimization again to determine the volume fractions for each country  
168 to match the target API and sulfur content and hence assemble the crude proxy that is assumed to  
169 be processed by the refining sector of different PADDs.

170 Step 5. Repeat step 1 to step 4 for other regions (PADDs). The blended crude proxies are  
171 presented in Dataset S4.

## 172 **Configurational Crude Input**

173 The configurational crude input is the total actual volume of crude that will be processed by the  
174 atmospheric tower (AT) for all refineries that shares the same configurations. Although PRELIM  
175 does not require the refinery's throughput to determine the emissions intensity per barrel of crude  
176 (kgCO<sub>2</sub>eq/bbl) or per megajoule of product (kgCO<sub>2</sub>eq/MJ), it is necessary to input the  
177 configurational crude input to aggregate emissions intensities across various refinery  
178 configurations. This aggregation is essential for calculating the total GHG emissions within a region,  
179 which typically hosts refineries of differing configurations. Furthermore, the volume proportions of  
180 crude processed by different refinery configurations also change over time, a result of the combined  
181 impact of evolving crude quality and product demand. Kim(12) developed an optimization model  
182 which used the standard refinery complex index (SRCI) to project the future trend of configurational  
183 refinery crude input for a specific region. This study applies a similar approach to derive the  
184 configurational crude input for future scenarios. Detailed stepwise procedure is outlined below.

185 Step 1. Determine the standardized complexity factor. The complexity factor is first developed by  
186 Nelson(17–19) which is used to assess the complexity of refinery's process unit by comparing the  
187 cost per capacity for building new individual process units and the cost per capacity for building  
188 new AT. Complexity factor is determined by Eq. S8 and is published by Oil and Gas Journal  
189 (OGJ)(20) on a yearly basis.

$$CF_{Unit} = \frac{Cost_{Unit}/Capacity_{Unit}}{Cost_{AT}/Capacity_{AT}} \quad \text{Eq. S8}$$

190 Where  $CF_{Unit}$  is the complexity factor for individual process unit.  $Cost_{Unit}$  and  $Cost_{AT}$  are the cost  
191 of building a new process unit and a new AT, respectively.  $Capacity_{Unit}$  and  $Capacity_{AT}$  are the  
192 capacity of the new-built process unit and AT, respectively.

193 Historically, CF has changed due to the change in cost per capacity for refinery process units. In  
 194 our study, we applied a constant CF (i.e., Standardized CF, SCF), which was taken from  
 195 Kaiser(21) and is shown in Table S19.

196 Step 2. Determine the individual and configurational Standardized Refinery Complexity Index  
 197 (SRCI). Once the SCF is determined, the SRCI for individual refineries in the U.S. could be  
 198 calculated using Eq. S9.

$$SRCI_{Refinery} = \sum \left( \frac{Capacity_{Unit}}{Capacity_{ADU}} \times SCF_{Unit} \right) \quad \text{Eq. S9}$$

199 OGI published unit capacities for every refinery in the U.S. from 1993 to 2019, and thus the  
 200 historical SRCI for individual refineries could be calculated. The configurational SRCI for  
 201 configuration  $i$  is the volume weighted average SRCI for a total of  $j$  individual refineries with  
 202 configuration  $i$  (see Eq. S10) over  $k$  years, where  $k$  is the total number of years from 1993 to 2019.

$$SRCI_{Config,i} = \sum_k \sum_j \left( SRCI_{Refinery,i}^{j,k} \times \frac{Q_{Refinery,i}^{j,k}}{\sum_k \sum_j Q_{Refinery,i}^{j,k}} \right) \quad \text{Eq. S10}$$

203 Where,  $Q_{Refinery,i}^{j,k}$  is the crude volume input (bbl/d) for an individual refinery  $j$  with configuration  $i$  at  
 204 year  $k$ . The configurational SRCI is presented in Table S5.

205 Step 3. Develop the multi-linear regression model to determine the target future regional SRCI.  
 206 Since the configurational SRCI is derived from historical individual refinery SRCI, which is varying  
 207 depending on the changing crude qualities and product demand over time in the U.S.(12).  
 208 Consequently, this allows for a hierarchical system that ranks refineries with different configurations  
 209 based on their ability to process crudes of varying qualities and produce products that meet the  
 210 demands of the U.S. market. The rationale of the SRCIs set foundation for developing a multi-linear  
 211 regression model that correlates the regional SRCI with the yield of different products and crude  
 212 quality. In order to derive the regional SRCI, we first need to derive the total crude input (i.e., crude  
 213 input) for each refinery configuration for each year by simply aggregating crude input for each  
 214 individual refinery of configuration  $i$  together for each year. Then, the regional SRCI for year  $k$  can  
 215 be defined as the sum product of the configurational SRCI for configuration  $i$  and the volume  
 216 proportion of the crude input for each configuration  $i$  (see Eq. S11).

$$SRCI_{Region}^k = \sum_i \left( SRCI_{Config,i} \times \frac{Q_{Config,i}^k}{\sum_i Q_{Config,i}^k} \right) \quad \text{Eq. S11}$$

217 Where,  $Q_{Config,i}^k$  is the total crude input for all refineries of configuration  $i$  at year  $k$ .  
 218 Since EIA documents crude qualities(15) (i.e., API gravity) as well as the product yields (22) (e.g.,  
 219 gasoline %, diesel %, jet %, etc.) for each year, we can develop the linear regression model to

220 correlate the regional SRCI for different region  $n$  (i.e., in this case, PADD  $n$ ),  $SRCI_{Region,n}$ , and API  
 221 and product yields (See Eq. S12).

$$SRCI_{Region,n} = c_n + a_{1,n} \times API_n + a_{2,n} \times Gas_n + a_{3,n} \times Diesel_n + a_{4,n} \times Jet_n \quad \text{Eq. S12}$$

222 Where  $n$  denotes the PADD number,  $c_n$  is the constant intercept,  $a_1, a_2, a_3, a_4$  are the regression  
 223 coefficients,  $SRCI_{Region}$  is the regional Standardized Refinery Complexity Index, API is the regional  
 224 crude input API degree, Gas, Diesel, Jet are the regional gasoline yields, diesel yields and jet yields  
 225 respectively. The constant and regressions coefficients for different PADD are list in Table S6.

226 The developed multi-linear regression model hence allows the projection of the regional SRCI using  
 227 future crude APIs and products' yields in different U.S. PADDs.

228 Step 4. Determine future configurational crude input using optimization. In order to determine the  
 229 crude input of different refinery configurations in future, an optimization model adopted from  
 230 Kim(12) is utilized. The regression model projects the target regional SRCI that is expected to  
 231 process crude with certain quality as well as to produce the product slate that adapts to the  
 232 transition of the fuel market. On the other hand, the regional SRCI can be defined as the sum  
 233 product of the configurational SRCI for configuration  $i$  and the volume proportion of the crude input  
 234 for each configuration  $i$ , as we mentioned in Eq. S11. Let us define the multi-linear regression model

235 (i.e., Eq. S12) derived target future regional SRCI in PADD  $n$  for future year  $k$  as  $SRCI_{Region,n}^{Target,k}$ . Let  
 236  $x_{i,n}^k$  be the future configurational crude input for configuration  $i$  in PADD  $n$  for future year  $k$ . Hence  
 237 the regional SRCI in PADD  $n$  for future year  $k$  could also be write as shown in Eq. S13.

$$SRCI_{Region,n}^k = \sum_i \left( SRCI_{Config,i} \times \frac{x_{i,n}^k}{\sum_i x_{i,n}^k} \right) \quad \text{Eq. S13}$$

238 Assuming that the regional SRCI,  $SRCI_{Region,n}^k$ , will tend to match the target regional SRCI,  
 239  $SRCI_{Region,n}^{Target,k}$ , indicating that refineries with different configurations will adapt their operations –  
 240 understood here that they will adjust their shares in the regional total crude processing capacity –  
 241 so that the jurisdiction is able to process the crude with a changing quality while to produce the  
 242 desired product slates that meet the regional demands. Hence, the objective function can be written  
 243 as:

$$\text{Minimize: } f_0(x_{i,n}^k) = |SRCI_{Region,n}^{Target,k} - SRCI_{Region,n}^k| \quad \text{Eq. S14}$$

244 Subject to

$$f_1(x_{i,n}^k) = \left| \sum_i x_{i,n}^k - X_n^k \right| \leq (0.05 \times X_n^k), k \in \{2035, 2050\} \quad \text{Eq. S15}$$

$$f_2(x_{i,n}^k) = \left| \sum_i \left( y_{i,n}^k \times \frac{x_{i,n}^k}{\sum_i x_{i,n}^k} \right) - Y_n^k \right| \leq (0.05 \times Y_n^k), k \in \{2035, 2050\} \quad \text{Eq. S16}$$

$$f_3(x_{i,n}^k) = x_{i,n}^k \leq [(1 + \Delta p_{i,n}^{ub}) \times X_{i,n}^{2019}], k = 2035 \quad \text{Eq. S17}$$

$$f_4(x_{i,n}^k) = x_{i,n}^k \leq [(1 + 2 \times \Delta p_{i,n}^{ub}) \times X_{i,n}^{2019}], k = 2050 \quad \text{Eq. S18}$$

$$f_5(x_{i,n}^k) = x_{i,n}^k \geq [(1 + \Delta p_{i,n}^{lb}) \times X_{i,n}^{2019}], k = 2035 \quad \text{Eq. S19}$$

$$f_6(x_{i,n}^k) = x_{i,n}^k \geq [(1 + 2 \times \Delta p_{i,n}^{lb}) \times X_{i,n}^{2019}], k = 2050 \quad \text{Eq. S20}$$

245 Constraints must be considered for the optimization model to acquire reasonable results and are  
246 explained as follows.

247 The first constraint is that the region's total refinery crude input should match the total refinery  
248 production, as shown in Eq. S15. EIA documented data (23, 24) suggested a linear correlation  
249 exists between the refinery's input and output, as shown in Figure S12.

250 Let us define the volume of the total refinery output in PADD  $n$  as  $O_n$ , thus the linear correlation  
251 could be written as:

$$X_n = b_n \times O_n \quad \text{Eq. S21}$$

252 Where,  $n$  denotes the PADD number,  $X$  is the total regional refinery input by volume,  $O$  is the  
253 regional total refinery output,  $b$  is the linear regression coefficient. The value of coefficient  $b_n$  is  
254 presented in Table S20.

255 Such relationship creates a certain range (i.e.,  $\pm 5\%$ ) that allows the configurational refinery crude  
256 input can vary in order to achieve the optimization goal, as shown in Eq. S15.

$$f_1(x_{i,n}^k) = \left| \sum_i x_{i,n}^k - X_n^k \right| \leq (0.05 \times X_n^k), k \in \{2035, 2050\} \quad \text{Eq. S15}$$

257 Where  $i$  denotes the refinery configuration,  $n$  denotes the PADD number,  $k$  denotes the future year  
258 (i.e., 2035 or 2050),  $x$  is the future configurational crude input,  $X$  is the total regional refinery crude  
259 input by volume.

260 The second constraint is to match the regional volume-weighted product yields, such as gasoline,  
261 diesel, and jet fuel, with the product yields derived from previous section (Supplementary method  
262 2) (see Eq. S4). PRELIM can generate product slates for each refinery configuration that matches  
263 the target regional slates as closely as possible by adjusting the material flows between process  
264 units. These PRELIM-derived product slates are then aggregated based on the volume share of  
265 each refinery configuration throughput at a regional level and match with the target slates (i.e.,  
266  $\pm 5\%$ ).

$$f_2(x_{i,n}^k) = \left| \sum_i \left( y_{i,n}^k \times \frac{x_{i,n}^k}{\sum_i x_{i,n}^k} \right) - Y_n^k \right| \leq (0.05 \times Y_n^k), k \in \{2035, 2050\} \quad \text{Eq. S16}$$

267 Where  $i$  denotes the refinery configuration,  $n$  denotes the PADD number,  $k$  denotes the future year  
268 (i.e., 2035 or 2050),  $Y$  is the target regional product's yields derived from previous section

269 (Supplementary method 2),  $\mathcal{Y}$  is the product's yields derived from PRELIM for different configuration  
 270 in specific region,  $x$  is the future configurational crude input.

271 The third to sixth constraints from Eq. S17 and Eq. S20 specify the upper and lower bounds for the  
 272 future configurational throughput. These bounds are determined based on the historical data  
 273 obtained from EIA and OGJ sources(20, 25).

274 To set the upper bounds for 2035, the mean configurational refinery crude input increases over the  
 275 past 15 years, compared to 2019, is assumed to be the maximum percentage increase. The upper  
 276 bounds for each configuration are then determined as the 15-year average percentage increases  
 277 based on the 2019 refinery crude input. Similarly, the upper bounds for 2050 are set as twice the  
 278 15-year average percentage increase based on the 2019 refinery crude input.

279 The lower bounds for the years 2035 and 2050 are also determined using the same approach.  
 280 Specifically, they are set as the 15-year averaged percentage decreases twice the 15-year  
 281 averaged percentage decreases based on 2019 throughput, respectively. The historical average  
 282 numbers are used to reflect how much a refiner is willing to change their throughput to adapt to  
 283 market changes such as shifts in crude qualities and product demand.

284 For any single year  $q$  from 2005 to 2019 with refinery crude input  $X_{i,n}^q$ , if  $(X_{i,n}^q - X_{i,n}^{2019}) > 0$ , then,

$$\Delta p_{i,n}^{ub} = \frac{1}{m} \sum_1^m \left[ \frac{(X_{i,n}^q - X_{i,n}^{2019})}{X_{i,n}^{2019}} \right] \quad \text{Eq. S22}$$

$$f_3(x_{i,n}^k) = x_{i,n}^k \leq [(1 + \Delta p_{i,n}^{ub}) \times X_{i,n}^{2019}], k = 2035 \quad \text{Eq. S17}$$

$$f_4(x_{i,n}^k) = x_{i,n}^k \leq [(1 + 2 \times \Delta p_{i,n}^{ub}) \times X_{i,n}^{2019}], k = 2050 \quad \text{Eq. S18}$$

285 Where  $i$  denotes the PADD number,  $j$  denotes the refinery configuration,  $m$  is the total number of  
 286 years with  $(X_{i,n}^q - X_{i,n}^{2019}) > 0$  from 2005 to 2019,  $k$  denotes the future year (i.e., 2035 or 2050),  $x$  is  
 287 the future configurational crude input,  $\Delta p_{i,n}^{ub}$  is the mean configurational refinery crude input increase  
 288 over the past 15 years compared to the year 2019,  $X_{i,n}^{2019}$  is the configurational refinery crude input  
 289 in each PADD for the year 2019.

290 For any single year  $q$  from 2005 to 2019 with refinery crude input  $X_{i,n}^q$ , if  $(X_{i,n}^q - X_{i,n}^{2019}) < 0$ , then,

$$\Delta p_{i,n}^{lb} = \frac{1}{m} \sum_1^m \left[ \frac{(X_{i,n}^q - X_{i,n}^{2019})}{X_{i,n}^{2019}} \right] \quad \text{Eq. S23}$$

$$f_5(x_{i,n}^k) = x_{i,n}^k \geq [(1 + \Delta p_{i,n}^{lb}) \times X_{i,n}^{2019}], k = 2035 \quad \text{Eq. S19}$$

$$f_6(x_{i,n}^k) = x_{i,n}^k \geq [(1 + 2 \times \Delta p_{i,n}^{lb}) \times X_{i,n}^{2019}], k = 2050 \quad \text{Eq. S20}$$

291 Where  $i$  denotes the PADD number,  $j$  denotes the refinery configuration,  $m$  is the total number of  
 292 years with  $(X_{i,n}^q - X_{i,n}^{2019}) < 0$  from 2005 to 2019,  $k$  denotes the future year (i.e., 2035 or 2050),  $x$  is  
 293 the future configurational crude input,  $\Delta p_{i,n}^{lb}$  is the mean configurational refinery crude input  
 294 decrease over the past 15 years compared to the year 2019,  $X_{i,n}^{2019}$  is the configurational refinery

295 crude input in each PADD for the year 2019. The mean configurational refinery crude input change  
296 for different configurations is summarized in Table S21.

297 Step 4. Repeat step 1 to step 3 for other regions (PADDs).

298 It is important to note that we simulated the crude input solely for the years 2035 and 2050. Although  
299 this method has the advantage of estimating annual operational changes in the refining sector  
300 based purely on publicly available data concerning crude qualities and product yields, real refineries  
301 often adjust their crude input based on refinery margins on a weekly, if not daily, basis. This  
302 discrepancy underscores that our optimization model is better suited for estimating changes in  
303 crude input over longer intervals. In this study, the chosen interval is 15 years, during which the  
304 correlation between configurational throughput changes and variations in crude qualities and  
305 product yields becomes significantly more pronounced.

306 There is additional limitation of the SRCI framework. The SRCI framework applied in this study is  
307 calibrated using historical refinery data and is intended to represent regional refinery complexity  
308 within a transportation-fuels-oriented operating regime. Historically, U.S. refineries have been  
309 predominantly focused on transportation fuel production, with gasoline, diesel, and jet fuel together  
310 accounting for approximately 85% of total refinery output according to EIA data. Consequently, the  
311 SRCI regression relates crude quality (API gravity) and transportation fuel yields (gasoline, diesel,  
312 and jet) to regional refinery complexity, consistent with the scope and assumptions of the modeled  
313 scenarios.

314 However, historical data may not fully capture potential future structural shifts in refinery product  
315 slates. For example, a scenario in which a greater share of the naphtha fraction is redirected from  
316 gasoline blending toward petrochemical production would represent a departure from past  
317 operating trends. The current SRCI specification does not explicitly include petrochemical-specific  
318 process units such as steam cracking, nor does it incorporate petrochemical feedstock yields as  
319 explanatory variables. Although petrochemical feedstocks accounted for approximately 2.0–5.7  
320 vol% of total U.S. refinery output between 2011 and 2019, and national production declined from  
321 approximately 146 million barrels per year in 2005 to 109 million barrels per year in 2019, these  
322 historical shares do not preclude future reconfiguration under changing demand conditions (24).  
323 Data limitations also exist at the regional level; for example, no petrochemical feedstock production  
324 is reported for PADD 4 during the 2011–2019 period.

325 Capturing a material shift toward refinery–petrochemical integration would therefore require re-  
326 specification and recalibration of the SRCI framework, rather than extrapolation of historical  
327 relationships beyond their validated domain.

### 328 **CO<sub>2</sub> Avoidance Cost Analysis.**

329 The CO<sub>2</sub> avoidance cost equation, adopted from Gale et al. (2), necessitates the estimation of  
330 capital expenditures (CapEx) and operational expenditures (OpEx) for various process units at  
331 different scales under assorted carbon capture scenarios. This approach requires establishing a

332 cost baseline from a reference process. In this study, the reference process for carbon capture  
 333 refers to the Base Case 04-03 developed by Gale et al. (2). The background information for the  
 334 reference case can be found in Table S22.

335 It is designed to capture CO<sub>2</sub> from multiple process heaters in a large complex refinery, and the flue  
 336 gas stream is generated by AT and VDU (i.e., Vacuum Distillation Unit). Table S23 summarizes  
 337 the equipment list, size metrics and the equipment cost for the reference process.

338 The cost of each piece of equipment could be estimated using the factorial method, as shown in  
 339 Eq. S24.

$$C_e = a + bD^r \quad \text{Eq. S24}$$

340 Where  $C_e$  is the equipment cost,  $a$  and  $b$  are coefficients,  $D$  is the size metric, and  $r$  is the exponent.  
 341 Eq. S24 could be used for estimating equipment cost that are presented in Table S23, and selected  
 342  $a$ ,  $b$ ,  $D$  and  $r$  that are used in this study could be found in Table S24.

343 Noted Eq. S24 is only valid when the size metric  $D$  falls between  $D_H$  and  $D_L$ . For circumstances  
 344 where  $D$  exceeds  $D_H$ , extra equipment will be considered. Table S25 compared the estimated cost  
 345 for the reference configuration, which is estimated based on a factorial approach, and the base  
 346 case 01-01 by Gale et al. (2), which is capturing CO<sub>2</sub> from an on-site power plant. All costs are  
 347 calibrated to the year 2019.

348 The function of equipment cost estimation for the absorption section is shown in Eq. S25.

$$\begin{aligned} & \text{Cost of absorption}_{new} \\ & = \text{Cost of absorber}_{new} + \text{Cost of other items}_{new} = \text{Eq. S25} \\ & + \left( \frac{\text{Flue gas mass rate}_{new}}{\text{Flue gas mass rate}_{ref}} \right)^{\text{exponent}} \times \text{Cost of other} \end{aligned}$$

349 Linear correlations have been developed between the diameter and the height of the absorber and  
 350 the flue gas mass rate based on (2) and are shown in Eq. S26 and Eq. S27.

$$\text{Absorber height} = \text{Flue gas mass rate} \times 0.0213 + 33.63 \quad \text{Eq. S26}$$

$$\text{Absorber diameter} = \text{Flue gas mass rate} \times 0.011 + 3.0757 \quad \text{Eq. S27}$$

351 In order to avoid unrealistic estimation of the size of the absorber, the maximum height for the  
 352 absorber is set to 50 m. Hence, the absorber's max capacity and the absorber's max diameter could  
 353 be calculated as 768.54 t/h and 11.53 m. If the total flue gas mass rate exceeds the max capacity,  
 354 then extra trains of the absorber will be considered to serve the needs for processing the additional  
 355 flue gas stream.

356 The function of equipment cost estimation for the regeneration section is shown in **Eq. S28**. Linear  
 357 correlations have been developed between the height of the stripper and the CO<sub>2</sub> flow rate to  
 358 compression based on literature data and are shown in **Eq. S29**.

$$\begin{aligned} \text{Cost of regeneration}_{new} \\ = \left( \frac{\text{CO}_2 \text{ Flowrate to compression}_{new}}{\text{CO}_2 \text{ Flowrate to compression}_{ref}} \right)^{\text{exponent}} \times (\text{St Eq. S28}) \end{aligned}$$

$$\text{Stripper height} = \text{CO}_2 \text{ Flowrate to compression} \times 0.0628 + 16.684 \quad \text{Eq. S29}$$

359 In order to avoid unrealistic estimation of the size of the stripper, the maximum height for the stripper  
 360 is set to 50 m. Hence the max capacity of the stripper could be calculated as 530.51 t/h. If the total  
 361 CO<sub>2</sub> flow rate to the stripper exceeds the max capacity, then extra trains of stripper will be  
 362 considered to serve the needs for processing the extra stream of CO<sub>2</sub> stream.

363 Modeling the dimensions of the carbon capture process unit requires a rigorous analysis of mass  
 364 transfer and thermodynamics, including equilibrium CO<sub>2</sub> concentrations in the gas phase,  
 365 estimation of mass transfer coefficients, effective mass transfer area, and gas superficial velocity.  
 366 However, as discussed in this paper, CO<sub>2</sub> sources are distributed throughout the refinery, with  
 367 operating conditions that vary based on crude input and desired product slates. Given the extensive  
 368 number of cases simulated in this study (a total of 19,610 data points), a simplified approach (i.e.,  
 369 linear regression) was adopted to estimate the dimensions of major carbon capture process units.  
 370 Additionally, the linear regression is based solely on data from Gale et al. study, where the reported  
 371 flue gas flow rates range from 61.3 to 1,150 t/h. The dataset indicates a strong correlation between  
 372 flue gas flow rate and absorber height but does not show such relationship between the ratio of  
 373 CO<sub>2</sub> concentrations in the inlet and outlet gas streams and absorber height. Similarly, a strong  
 374 correlation is observed between flue gas flow rate and absorber diameter, as well as CO<sub>2</sub> flow rate  
 375 and stripper height. As previously mentioned, a maximum height limit was imposed on absorbers  
 376 and strippers to ensure that the dimensions remain within the range of the dataset used to develop  
 377 linear regression equations. However, in certain scenarios, the flue gas flow rate from specific  
 378 process units falls below the lower bound of Gale's dataset (61.3 t/h). In such cases, extrapolating  
 379 the data may lead to an overestimation of carbon capture costs. Furthermore, Julio et al. (26)  
 380 suggest that the height of commercial absorbers should typically range from 20 to 36 m. This  
 381 implies that many of the cases in our study with very low flue gas flow rates would likely not be

382 considered viable for carbon capture in reality. Even if they were, the costs would be prohibitively  
 383 high due to the limited availability of equipment with the required dimensions. Danaci et al. (27)  
 384 also shows that when flue gas flow rate is extremely low (3.6 t/h), the CO<sub>2</sub> capture cost could reach  
 385 over 1,000 \$/t CO<sub>2</sub> captured. These considerations have been captured in the linear regression  
 386 equations by including the intercept.

387 Moreover, a sensitivity analysis was conducted to assess the impact of variations in unit dimensions  
 388 on CO<sub>2</sub> avoidance costs, considering cases where dimensions are 50% and 150% of those  
 389 estimated using linear regression (see Figure S23). The mean CO<sub>2</sub> avoidance costs under these  
 390 three scenarios (i.e., 50%, 100%, and 150% of the estimated dimensions) are 290.3, 293.4, and  
 391 301.3 \$/t, respectively. These results confirm that even significant changes in absorber and stripper  
 392 dimensions have a minimal effect on CO<sub>2</sub> avoidance costs.

393 Eq. S30, Eq. S31, Eq. S32 and Eq. S33 are functions of equipment cost estimation for CO<sub>2</sub>  
 394 compression, interconnection, cooling towers and wastewater treatment, respectively.

$$\begin{aligned}
 \text{Cost of compression}_{new} &= \text{Cost of compression}_{new}^{\text{capacity dependent}} + \text{Cost of c} \quad \text{Eq. S30} \\
 &\times (\text{Cost of compression}_{ref}^{\text{capacity dependent}}) + 600,000 \\
 \text{Cost of interconnection}_{new} &= \left( \frac{\text{CO}_2 \text{ Flowrate to compression}_{new}}{\text{CO}_2 \text{ Flowrate to compression}_{ref}} \right)^{\text{exponent}} \times (\text{Cost of interconnec} \quad \text{Eq. S31} \\
 \text{Cost of cooling tower}_{new} &= \left( \frac{\text{Number of cells}_{new}}{\text{Number of cells}_{ref}} \right)^{\text{exponent}} \times (\text{Cost of cooling tower}_{ref}) \quad \text{Eq. S32} \\
 \text{Cost of wastewater treatment}_{new} &= \left( \frac{\text{Wastewater inlet}_{new}}{\text{Wastewater inlet}_{ref}} \right)^{\text{exponent}} \times (\text{Cost of wastewater treat} \quad \text{Eq. S33}
 \end{aligned}$$

395 Noted that the capacity for a single cell of the cooling tower is set to 2500 m<sup>3</sup>/h. The capacity  
 396 parameter and the exponent mentioned in Eq. S25, Eq. S28, and Eq. S30 to Eq. S33 are presented  
 397 in Table S26.

398 The other minor equipment cost is set to be 10% of the total cost for the major equipment mentioned  
 399 above. Location factors are transposed from the Chemical Engineering Design book(28),  
 400 containing 4 U.S regions: Gulf Coast, Mid-West, West Coast and East Coast. PADD 1 and 2 refers  
 401 to East Coast, PADD 3 refers to Gulf Coast, PADD 4 refers to Mid-West, and PADD 5 refers to  
 402 West Coast. Table S15 summarizes the location factors that are used in this study.

403 Other key performance indicators (KPIs) that are necessary for calculating CapEx and OpEx are  
 404 included in Table S7 and Table S8, respectively.

405 The Chemical Engineering Plant Cost Index (CEPCI) used to estimate future cost is extrapolated  
 406 from literature and is presented in Table S27. Hence, the CapEx can be estimated using Eq. S34.

407

$$\begin{aligned}
 CapEx_{new} &= C_{TPC}^{ref} \times (1 + R_{other}) \times LF \times \frac{CEPCI_{new}}{CEPCI_{ref}} = (C_e^{ref} \times (1 + R_{construction} \times R_{EPC} \times CONTG) \times LF \times \frac{CEPCI_{new}}{CEPCI_{ref}} \quad \text{Eq. S34}
 \end{aligned}$$

408 Where,  $CapEx_{new}$  refers to the capital expenditure at the target year (i.e., 2035 or 2050),  $C_{TPC}^{ref}$  refers  
 409 to the total plant cost at the baseline year (i.e., 2019),  $C_e^{ref}$  refers to the equipment purchase cost  
 410 at the baseline year,  $R_{other}$  refers to the ratio of other costs to the total plant cost,  $R_{construction}$  refers  
 411 to the ratio of construction cost to the total equipment purchase cost,  $R_{EPC}$  refers to the ratio of EPC  
 412 service cost to the total equipment purchase cost,  $CONTG$  refers to the project contingency,  $LF$   
 413 refers to the location factor,  $CEPCI$  refers to the Chemical Engineering Plant Cost Index.

414 The CO<sub>2</sub> avoidance cost metric as defined in this study (and consistent with most others) excludes  
 415 carbon pricing effects and potential revenues from CO<sub>2</sub> sales or utilization. CO<sub>2</sub> avoidance costs  
 416 are intended to be used as a means of comparing the cost of reducing emissions using a given  
 417 mitigation option with other like options or with an externally imposed carbon price (29). While they  
 418 may include the effect of policies such as investment or production tax credits (e.g., Section 45Q  
 419 tax credits), we do not include such policies in our avoidance cost calculations.

420 Furthermore, we exclude impacts of CO<sub>2</sub> sales or utilization on investment decisions, as the current  
 421 and foreseeable market size for CO<sub>2</sub> as a commodity remains limited and highly uncertain. In North  
 422 America, the largest end use of externally sourced CO<sub>2</sub> is enhanced oil recovery (EOR), with total  
 423 demand on the order of ~60 MtCO<sub>2</sub>/yr, of which only approximately 16% is supplied by industrial  
 424 sources(30). Prices for commodity CO<sub>2</sub> are typically determined through long-term bilateral  
 425 contracts and vary widely depending on purity requirements, transaction volumes, and local  
 426 supply–demand conditions. For example, CO<sub>2</sub> used in ammonia and other industrial applications  
 427 is often priced in the range of 3–15 \$/tCO<sub>2</sub>, whereas niche applications requiring high purity and  
 428 small show volumes can command substantially higher prices(31). Given the relatively small scale  
 429 of these markets and the high uncertainty in achievable CO<sub>2</sub> prices, incorporating CO<sub>2</sub> sales  
 430 revenues into avoidance cost curves would affect only a small fraction of total captured CO<sub>2</sub> and  
 431 would be unlikely to materially alter the relative ranking of capture options, while potentially  
 432 introducing additional uncertainty.

433 From a Canadian policy perspective, the federal government has implemented an industrial carbon  
 434 pricing framework - the Output-Based Pricing System (OBPS) - which applies to large industrial  
 435 facilities in most provinces. Under the OBPS, facilities face a carbon price on emissions that exceed  
 436 facility-specific emissions-intensity benchmarks. The federal government establishes minimum  
 437 national carbon pricing benchmarks, which were set at CAD 20/tCO<sub>2</sub> in 2019 and increased by  
 438 CAD 10/tCO<sub>2</sub> annually to CAD 50/tCO<sub>2</sub> in 2022. The benchmark was subsequently updated to

439 increase by CAD 15/tCO<sub>2</sub> annually starting in 2023, reaching CAD 170/tCO<sub>2</sub> by 2030 (32).  
440 Assuming an average annual exchange rate of 0.72 USD per CAD, the corresponding carbon  
441 prices are approximately 14.4, 36.0, 57.6, and 122 \$/tCO<sub>2</sub> in 2019, 2022, 2024, and 2030,  
442 respectively. Figure 2 indicates that carbon price levels of approximately 122 \$/tCO<sub>2</sub> are required  
443 to enable substantial emissions reductions from the U.S. refining sector—approximately 16.6  
444 MtCO<sub>2</sub>eq/y (17.6%)—through deployment of CCS on FCC units at medium and deep conversion  
445 refineries, as well as SMR units at deep conversion refineries in PADD 3. Interpreted in the  
446 Canadian policy context, this price level is comparable to the federal benchmark scheduled for  
447 2030. However, the scheduled benchmark does not necessarily reflect the effective compliance  
448 price faced by regulated facilities. In practice, effective carbon prices in some provinces have been  
449 substantially below the headline benchmark. For example, recent credit market conditions in  
450 Alberta have resulted in effective compliance prices below 20 CAD/tCO<sub>2</sub> (33). While recent federal–  
451 provincial discussions have indicated an intention to strengthen effective pricing toward CAD  
452 130/tCO<sub>2</sub>, no firm implementation date has been established, and future effective price trajectories  
453 remain uncertain.

#### 454 **Supplementary Method 3 - Real Option Analysis**

##### 455 **Probability of Individual Refinery's Strategic Options.**

456 In option pricing theory, the Black-Scholes model assumes that the stock price follows a Brownian  
457 motion with a drift (i.e., geometric Brownian motion) (34). The stock price that follows the geometric  
458 Brownian motion will satisfy the following stochastic differential equation:

$$dS_t = \mu S_t dt + \sigma S_t dW_t \quad \text{Eq. S35}$$

459 Where  $S_t$  here represents the stock price,  $\mu$  is drift,  $\sigma$  is volatility, and  $W_t$  is a Wiener process  
460 (Brownian motion). Binomial lattice model is a discrete time model that eventually converges to the  
461 Black-Scholes equation, where the random walk of the stock price on the binomial lattice  
462 approximates the GBM process (35). There exists a close analogy between financial option and  
463 real option analysis, according to He (36).

464 Three individual refineries with different configurations (i.e., hydroskimming, medium conversion:  
465 FCC & GOC, deep conversion: FCC & GOC) are considered in the RO analysis. The crude input  
466 for these refineries in 2019 is assumed to be the average (i.e., arithmetic mean) for refineries with  
467 the same configurations across the U.S., thereby representing typical U.S. refineries for that year.  
468 Future (i.e., 2020 to 2050) crude input for these refineries are calculated based on the ratio of the  
469 total projected crude input for each refinery configuration in the U.S., as forecasted by the  
470 optimization technique described in the previous section (Supplementary method 2) under varying  
471 fuel demand scenarios, to the total crude input in 2019, as shown in Eq. S36. Note for each

472 individual refinery we assume three fuel demand scenarios (i.e., low, medium and high), which  
 473 correspond to BL to LD35/50, BL to MD35/50 and BL to HD35/50 scenarios.

$$Q_{Crude,j}^t = Q_{Crude,j}^{2019} \times \frac{x_j^t}{x_j^{2019}} \quad \text{Eq. S36}$$

474 Where  $Q_{Crude,j}^t$  and  $Q_{Crude,j}^{2019}$  are the crude input of the selected individual refinery with configuration  
 475  $j$  ( $j = 0, 3, 6$ ) in year  $t$  ( $t \in (2020, 2050)$ ) and year of 2019, respectively.  $x_j^t$  and  $x_j^{2019}$  are the total  
 476 crude input of refineries in U.S. with configuration  $j$  in year  $t$  and year of 2019, respectively.

477 It is noteworthy that the crude input for certain refinery archetype, such as hydroskimming  
 478 (configuration 0), is projected to increase in the future under specific fuel demand scenarios.  
 479 However, it is widely recognized that U.S. refiners are unlikely to expand their operations in the  
 480 face of declining fuel demand and more stringent carbon policies (37). Consequently, a constraint  
 481 has been implemented ensuring that the selected individual refinery maintains its crude input

482 constant whenever the ratio  $\frac{x_j^t}{x_j^{2019}} \geq 1$ , indicating that no new investments will be made to expand  
 483 the refinery's operations. The total production and the yield of transportation fuels are optimized  
 484 using the embedded product matching tool in PRELIM to align with the EIA-documented product  
 485 slates in 2019 and the projected refinery product slates from 2020 onwards for each refinery.  
 486 Detailed information on each individual refinery is provided in Table S9. Sensitivity analysis on the  
 487 likelihood of different options for a medium typical U.S. refinery under a medium transportation fuel  
 488 demand is also considered in Section 3.2.

489 Consider a state space  $A$ , which contains a vector  $a_t$  denoting the refinery's current status including  
 490 volume of crude input  $Q_{Crude}$ , volume of refinery product  $m$ ,  $Q_{Product,m}$ , mass of GHG emissions  
 491  $M_{GHG}$ , natural gas consumptions for refinery process units and carbon capture unit  $E_{NG}$  and  
 492  $E_{NG,CC}$ , electricity consumptions for refinery process units and carbon capture unit  $E_{Elec}$  and  
 493  $E_{Elec,CC}$ , fixed operating cost  $U_{Fix}$  and capital investment in carbon capture  $I_{CC}$  at time  $t$ . State space  
 494  $A$  can thus be expressed as equation Eq. S37. The action  $b_t$  that refinery could take at time  $t$ , are  
 495 from a set of actions  $B$  as stated in equation Eq. S38. Hence the refinery's cash flow at state  $a_t$   
 496 when action  $b_t$  is taken could be estimated as equation Eq. S39

$$A = \left\{ \left[ Q_{Product,m}^t, Q_{Crude}^t, M_{GHG}^t, E_{NG}^t, E_{NG,CC}^t, E_{Elec}^t, E_{Elec,CC}^t, U_{Fix}^t, I_{CC}^t \right] \right\} \quad \text{Eq. S37}$$

$$B = \left\{ \begin{array}{l} 1. \text{Continue operation;} \\ 2. \text{Deploying carbon capture;} \\ 3. \text{Shutdown the refinery} \end{array} \right\} \quad \text{Eq. S38}$$

$$CFL(a_t)_{b_t} = \begin{cases} \left( \sum \pi_{Product_m}^t Q_{Product_m}^t \right) - \pi_{Crude}^t Q_{Crude}^t - \pi_{Carbon}^t M_{GHG}^t - \pi_{NG}^t E_{NG}^t - \pi_{Elec}^t E_{Elec}^t - U_{Fix}^t \\ \left( \sum \pi_{Product_m}^t Q_{Product_m}^t \right) - \pi_{Crude}^t Q_{Crude}^t - \pi_{Carbon}^t M_{GHG}^t - \pi_{NG}^t (E_{NG}^t + E_{NG_{CC}}^t) - \pi_{Elec}^t (E_{Elec}^t + E_{Elec_{CC}}^t) - U_{Fix}^t - I_{CC}^t \\ 0 \end{cases} \quad \text{Eq. S39}$$

$$CFL(a_t)_{b_t} = \begin{cases} R_{Products}^t - C_{Crude}^t - C_{Carbon}^t - C_{NG}^t - C_{Elec}^t - C_{Fix}^t, & b_t = 1 \\ R_{Products}^t - C_{Crude}^t - C_{Carbon_{CC}}^t - C_{NG_{CC}}^t - C_{Elec_{CC}}^t - C_{Fix}^t - I_{CC}^t, & b_t = 2 \\ 0, & b_t = 3 \end{cases} \quad \text{Eq. S40}$$

497 Where,  $CFL(a_t)_{b_t}$  is the cash flow of the refinery at time  $t$  with state  $a_t$  when action  $b_t$  is taken.

498  $\pi_{Crude}^t$ ,  $\pi_{Carbon}^t$ ,  $\pi_{NG}^t$ ,  $\pi_{Elec}^t$ ,  $\pi_{Product_m}^t$  are prices for crude oil, carbon emissions, natural gas,  
499 electricity and product  $m$ , respectively.

500 Let  $S(a_t)_{b_t}$  be the present value of the refinery at time  $t$  with state  $a_t$  when action  $b_t$  is taken. Let  
501  $\delta(a_t)_{b_t}$  be the instantaneous dividend distribution rate at time  $t$ . Thus  $S(a_t)_{b_t}$  and  $\delta(a_t)_{b_t}$  could be  
502 expressed as Eq. S41 and Eq. S42, respectively.

$$S(a_t)_{b_t} = \sum_{i=t}^T \frac{CFL(a_t)_{b_t}}{(1 + \mu)^i}, \quad t \in (0, T), b_t \in (1,3) \quad \text{Eq. S41}$$

$$\delta(a_t)_{b_t} = \frac{CFL(a_t)_{b_t}}{S(a_t)_{b_t}}, \quad t \in (0, T), b_t \in (1,3) \quad \text{Eq. S42}$$

503 Where  $\mu$  is the risk-adjusted discount rate (i.e., 12%),  $T$  is the maturity time (i.e., expiry time) of  
504 options.

505 When  $b_t = 1$ ,  $S(a_t)_1$  is equivalently the present value of the project without option (i.e., continue  
506 operation) and hence could be served as the underlying asset value in RO (38). The prices of crude  
507 oil, natural gas, refinery products and electricity have strong correlations and are both affected by  
508 factors beyond market conditions (e.g., geopolitics) and thus beyond the capacity of this study.  
509 Hence, we utilized the prices estimated by the Annual Energy Outlook (AEO) (39) on reference  
510 case for cash flow calculation. The carbon price, on the other hand, is assumed to follow a GBM  
511 (40), such that the random walk of the underlying asset value will also follow GBM and traditional  
512 option pricing method is applicable (41). The drift and volatility for the GBM of carbon price are both

513 constant and are taken from McKeller (summarized in Table S28), while the starting carbon prices  
514 are taken from the European Union's (EU) Emissions Trading Scheme (ETS) (42).  
515 10,000 trajectories of carbon prices are generated (Figure S12) and will be used for a Monte Carlo  
516 simulation for the binomial lattice. Detailed statistics information could also be found in Table S30.  
517 Assuming that the cash flow will be paid by the end of each time step, which in this case is 1-year,  
518 and if the underlying asset value in node  $j$  at time  $t$  is  $S(a_{t,j})$ , the underlying asset value of its child  
519 nodes could be expressed by Eq. S43 to Eq. S46.

$$S(a_{t+1,j})^+ = (S(a_{t,j}) - S(a_{t,j})\delta(a_t)) \times u \quad \text{Eq. S43}$$

$$S(a_{t+1,j+1})^- = (S(a_{t,j}) - S(a_{t,j})\delta(a_t)) \times d \quad \text{Eq. S44}$$

$$u = e^{\sigma\sqrt{\Delta t}} \quad \text{Eq. S45}$$

$$d = e^{-\sigma\sqrt{\Delta t}} \quad \text{Eq. S46}$$

520 Where  $u$  and  $d$  are up and downward factors respectively.  $\sigma$  is the volatility of the underlying asset  
521 value, which could be estimated using the method developed by Cobb et al. (43),  $\Delta t$  is the time  
522 step (i.e., 1 year),  $j$  is the node number at time  $t$  ( $j \in (1, t)$ ) and the plus/minus superscripts indicate  
523 whether the random walk of the underlying asset value goes up or down.  
524 Hence, the random walk of the underlying asset value on the binomial lattice in node  $j$  at time  $t$  is  
525 governed by Eq. S47.

$$S(a_{t,j}) = S(a_0)_1 \times u^{t-j} \times d^j \times \prod_{k=1}^{t-1} [1 - \delta(a_k)_1] \quad \text{Eq. S47}$$

526 Let  $b_T^*$  be the optimal decisions that the refinery will take at expiry date  $T$  and  $V(i,T)_{b_T^*}$  be the  
527 valuation function of the optimal decision. Hence, the optimal decision and the expected present  
528 value of the project at time  $t$  could be computed using backward induction by Eq. S48 to Eq. S50.

$$\begin{cases} b_T^* = \text{argsup}\{V(i,T)_{b_T^*}\} \\ V(i,T)_{b_T^*} = \text{sup}\{V(i,T)_{b_T^*}\} \end{cases} \quad \text{Eq. S48}$$

$$\begin{cases} V(i,t)_{b_t^*} = \max \left( \begin{array}{l} \left( pV(i,t+1)_{b_{t+1}^*} + (1-p)V(i+1,t+1)_{b_{t+1}^*} \right) \times e^{-rf \cdot \Delta t} + CFL(a_t)_1, \\ S(a_{t,j}) + \Delta S(a_t), \\ 0 \end{array} \right) \\ V(i,T)_{b_T^*} = \max \left( \begin{array}{l} S(a_{T,j}) + S(a_T)_1, \\ S(a_{T,j}) + S(a_T)_2, \\ 0 \end{array} \right) \end{cases} \quad \text{Eq. S49}$$

$$p = \frac{e^{rf \cdot (\Delta t)} - d}{u - d}$$

Eq. S50

529 Where,  $V(i, t)_{b_t^*}$  is the valuation function of the optimal decision at time  $t$ ,  $p$  is the risk-neutral  
 530 probability,  $rf$  is the risk-free interest rate,  $\Delta S(a_t)$  is the present value difference of the refinery after  
 531 carbon capture is deployed.

532 This study uses a different real option model than those by Reinelt et al. (44) and McKellar et al.  
 533 (45) use different methods for real options analysis—namely dynamic programming vs contingent  
 534 claims(36). The dynamic programming approach also uses expected asset values but explores all  
 535 future pathways leading to the current time node. Therefore, the probability used those studies is  
 536 the “real-world probability,” representing the likelihood of each pathway occurring among all  
 537 possible future pathways. This is why the discount rate is incorporated—because the probability  
 538 does not capture risk. The rationale for having a different discount rate and risk-free interest rate in  
 539 this study is that the underlying asset value in 2019 (i.e., node 0) is calculated based on the present  
 540 value of the future discount cash flow of the refinery, which is the best unbiased estimator of the  
 541 market value of the project if it were a traded asset (38). The 12% discount rate is a reflection of  
 542 the company’s perspective on the project’s economics based on the perfect foresight of future price  
 543 projections.

544 However this discount rate cannot be used to calculate the expected present value calculation  
 545 during the backward induction, because the refinery holds the right but not the obligation to invest  
 546 - the 12% discount rate would change if the refinery deferred investment (46). He (36) also noted  
 547 that, mathematically, the two approaches (dynamic programming versus contingent claim) to real  
 548 options should yield the same results unless a constant discount rate is assumed. In that case, the  
 549 constant rate must equal the risk-free interest rate to ensure alignment of results, implying a market  
 550 price of risk equal to zero. This reasoning also aligns with the original binomial option pricing theory  
 551 by Cox et al (35). The Cox–Ross–Rubinstein (CRR) model is a simplified option pricing framework  
 552 that does not require investors’ subjective probabilities regarding whether the asset value will move  
 553 up or down. It also does not depend on investors’ attitudes toward risk, since the model assumes  
 554 a constant risk-free interest rate to prevent arbitrage opportunities. However, if the interest rate  
 555 changes with the up/down states of the portfolio, the model’s assumptions no longer hold.

556 It should also be noted that execution of the option to invest (i.e., deploy carbon capture) and the  
 557 option to abandon (i.e., shut down the refinery) is non-reversible. Since the binomial lattice is  
 558 considered path-dependent, certain constraints must be utilized so that once the decision is made,  
 559 the investment will be locked in subsequent periods (41).

560 For a specified carbon price trajectory, a single binomial lattice is generated Figure S13. A Monte  
 561 Carlo simulation is then employed, sampling various carbon price trajectories that adhere to the  
 562 GBM process to create a set of binomial lattices (i.e., 10,000 runs). This setup allows for the

563 calculation of the likelihood of different options at a specific time  $t$  by dividing the number of nodes  
564 executing option  $b_t$  by the total number of nodes at that time.

### 565 **Additional Carbon Price Trajectory Scenarios**

566 In addition to the GBM-based carbon price scenario presented in the manuscript, we construct two  
567 alternative carbon pricing scenarios in which carbon price changes are governed by a Bernoulli  
568 process. In these scenarios, at each decision point the carbon price may increase by a discrete  
569 amount with a probability drawn from a specified range. Once a price increase occurs, the carbon  
570 price is held constant for a fixed period (i.e., two years), after which another Bernoulli trial  
571 determines whether an additional increase occurs.

572 The magnitude of each price increase is drawn from a uniform distribution between 10–30  $\$/\text{tCO}_2$   
573 (equivalent to 5–15  $\$/\text{t-yr}$ ), and the probability of an increase is drawn from a uniform distribution  
574 between 10% and 50%. A soft cap on the carbon price of 250  $\$/\text{tCO}_2$  is imposed such that, once  
575 the simulated carbon price reaches or exceeds this level, the probability of further increases is  
576 reduced to 0.1–0.5%, effectively limiting additional growth. A threshold year (2035) is also specified  
577 to control whether price increases are permitted to occur before or after this point in time. If price  
578 increases are allowed to occur before the threshold year, the scenario is referred to as an  
579 anticipated carbon price (A-CP) scenario; if price increases are deferred until after the threshold  
580 year, it is referred to as a deferred carbon price (D-CP) scenario. In the A-CP scenario, the  
581 combination of the soft cap and reduced post-cap probabilities produces a plateau in carbon prices  
582 after the threshold year, whereas in the D-CP scenario, carbon prices remain relatively low prior to  
583 the threshold year and increase thereafter.

584 These carbon price trajectories are not intended to represent contemporary carbon pricing  
585 regulations. Rather, they are designed to achieve three modeling objectives. First, they generate  
586 long-term average carbon price levels comparable to those produced by the GBM-based trajectory  
587 by 2050, enabling consistent comparison across scenarios. Second, the Bernoulli-based structure  
588 with fixed holding periods reflects the stepwise nature of carbon price adjustments commonly  
589 observed in regulatory settings. Third, the plateau behavior—particularly in the A-CP scenario—is  
590 used to approximate potential mean-reverting behavior in carbon prices under political and  
591 regulatory constraints. Given the early stage of carbon pricing implementation across jurisdictions,  
592 the long-term equilibrium level of carbon prices remains uncertain, as does whether prices will  
593 continue to rise indefinitely or stabilize at some future level. As discussed in the manuscript, current  
594 carbon prices are generally insufficient to incentivize large-scale deployment of industrial mitigation  
595 technologies such as CCS. Accordingly, we assume that carbon prices eventually converge toward  
596 levels higher than current values. For consistency across scenarios, this convergence level is set  
597 at 250  $\$/\text{tCO}_2$ , which is close to the mean carbon price realized in the real-options analysis  
598 presented in the manuscript (hereafter referred to as R-CP).

599 **Sensitivity Analysis on Probability of Individual Refinery’s Strategic Options.**

600 A sensitivity analysis was conducted to evaluate the probability of different strategic options for a  
601 medium conversion refinery operating under a medium fuel demand scenario. This analysis varied  
602 five key parameters: the risk-neutral interest rate, crack spread, CCS utility consumption, CCS  
603 capital costs and carbon price. Each parameter was assessed to determine its influence on the  
604 timing and likelihood of implementing strategic decisions at the refinery, with three scenarios—  
605 High, Reference, and Low - defined for each to systematically explore their impact on operational  
606 choices. In RO analysis, future cash flows are discounted using the risk-free interest rate, typically  
607 the 10-year U.S. Treasury bond rate, which assumes investors are indifferent to risk. This allows  
608 them to concentrate solely on expected returns without adjusting to risk preferences. In this study,  
609 the reference case for the risk-free interest rate is the 10-year U.S. Treasury bond rate as of 2019,  
610 which was 3%. The high and low scenarios are set at 7% and 1%, respectively, representing the  
611 highest and lowest points of the bond rate over the past 20 years. These variations in the risk-  
612 neutral interest rate could indicate how shifts in monetary policy might influence refinery decisions.  
613 Crack spread, which refers to the difference between the price of refined petroleum products and  
614 the cost of crude oil, reflects the prevailing market conditions of the oil and gas industry. The Annual  
615 Energy Outlook (AEO) models these prices under various scenarios, including high, reference, and  
616 low oil price scenarios. Consequently, the high, reference, and low crack spread cases for the  
617 sensitivity analysis in this study are aligned with these corresponding price scenarios from the AEO.  
618 The CCS utility cost and CCS capital cost can reflect the technological advances in carbon capture  
619 technology. The higher and lower bond of the CCS utility and capital cost is set to be 150% and  
620 50% of reference cases. Similarly, carbon price, which represents the tax paid by refiners on carbon  
621 emissions, also set to be vary between 150% and 50% of the reference case. The selected  
622 parameters for sensitivity analysis are summarized in Table S16.

623 **Expected Total GHG Emissions & Refinery Production.**

624 It is important to note that RO is applied only to individual refineries in this study. This approach is  
625 used because once a refinery decides to execute a strategic option, such as shutting down, it  
626 inevitably alters the market dynamics—specifically, the supply-demand balance and subsequently  
627 the price of transportation fuels in the U.S. market. Consequently, these changes will also influence  
628 the likelihood of different strategic options being viable for other refineries. Nevertheless, we can  
629 still gain insight into the potential changes in total GHG emissions from the three selected refinery  
630 configurations in the U.S. by using expected GHG emissions as an indicator. The expected GHG  
631 emissions at time  $t$  is defined by Eq. S51.

$$E(GHG_t) = \sum_i \sum_b (GHG_{i,t}^b \times p_{i,t}^b) \quad \text{Eq. S51}$$

632 Where,  $i$  denotes the selected refinery configurations,  $t$  denotes time between 2019 and 2050,  $b$   
 633 denotes three considered strategic options,  $E(GHG_t)$  is the expected total GHG emissions from the  
 634 three selected refinery configurations at time  $t$ ,  $GHG_{i,t}^b$  is the GHG emissions induced by strategic  
 635 option  $b$  for configuration  $i$  at time  $t$ ,  $p_{i,t}^b$  is the likelihood of the strategic option  $b$  for configuration  $i$   
 636 at time  $t$ .

637 Similarly, we can also define the expected production for different refinery products based on the  
 638 likelihood of different options, as shown in Eq. S52.

$$E(Q_t) = \sum_i \sum_b \left( \sum_y Q_{y,i,t}^b \times p_{i,t}^b \right) \quad \text{Eq. S52}$$

639 Where,  $i$  denotes the selected refinery configurations,  $t$  denotes time between 2019 and 2050,  $b$   
 640 denotes three considered strategic options,  $y$  denotes different refinery products,  $E(Q_t)$  is the  
 641 expected total production from the three selected refinery configurations at time  $t$ ,  $Q_{y,i,t}^b$  is the  
 642 production of product  $y$  produced by refinery configuration  $i$  applying strategic option  $b$  at time  $t$ ,  
 643  $p_{i,t}^b$  is the likelihood of the strategic option  $b$  for configuration  $i$  at time  $t$ .

## 644 **Supplemental Result 1 – Product Slates, Crude Qualities and Crude Input for U.S.** 645 **Refineries**

### 646 **Estimated U.S. Regional Volume of Production for Different Refinery Products under** 647 **Different Transportation Fuel Demand Scenarios.**

648 In the medium petroleum fuel demand (MD) scenario, the total production (including those not  
 649 intends for transportation usage) of U.S. refining sector is estimated to decrease by 20% in 2035  
 650 (from 7.20 Gbbl/y to 5.76 Gbbl/y) and further decrease by 11% in 2050 (from 5.76 to 5.13 Gbbl/y).  
 651 Comparing the low petroleum fuel demand (LD) scenario to the MD scenario, it is found that the  
 652 total refinery production is equivalent to 92% of the MD in 2035 (5.32 to 5.76 Gbbl/y) and only 72%  
 653 in 2050 (3.69 to 5.13 Gbbl/y). Conversely, in the high fuel demand (HD) scenarios, the total refinery  
 654 production is estimated to be 118% (6.80 to 5.76 Gbbl/y) and 134% (6.87 to 5.13 Gbbl/y) of the  
 655 MD35 and MD50 scenario, respectively. The decline in gasoline and diesel demands is identified  
 656 as the primary driver for the decrease in refinery production. According to NREL's EFS (11),  
 657 gasoline and diesel demand are expected to decrease, while jet fuel demand may remain stable or  
 658 increase towards 2050. Figure S3 shows that, across all scenarios, gasoline production is projected  
 659 to decrease by 16% (from 3.69 to 3.09 Gbbl/y) to 47% (from 3.69 to 1.96 Gbbl/y) in 2035 and 21%  
 660 (from 3.69 to 2.90 Gbbl/y) to 80% (from 369 to 0.747 Gbbl/y) in 2050. Furthermore, the study finds

661 that PADD 1 refineries produced the most gasoline in the US, making it the region with the highest  
662 gasoline production reduction in the future. For instance, the total gasoline production in PADD 1  
663 is expected to decline from 1.20 to 0.405 and 0.255 Gbbl/y HD35 and LD35 scenarios, respectively.  
664 The reduced gasoline production in PADD 1 accounts for 55% (LD35) to 132% (HD35) of the total  
665 gasoline production reduction.

#### 666 **Estimated U.S. Crude Input Qualities.**

667 Historical data shows that trends of crude APIs are different between PADDs. For example, crudes  
668 that are being processed on the East Coast (PADD 1), Gulf Coast and West Coast (PADD 5) are  
669 getting lighter over the last few decades. A possible explanation for this trend could be the  
670 increasing production of domestic lighter crude (i.e., API > 40) production, which is mainly produced  
671 in Texas. For example, over 65% of the volume of crudes that are processed by PADD 3 refineries  
672 are imported in 2011, and this percentage has decreased to 30% by 2018. On the contrary,  
673 refineries in Mid-West (PADD 2) and Rocky Mountains (PADD 4) are increasingly intaking  
674 Canadian crudes that are usually considered heavy, due to geographical advantages. The sulfur  
675 content, unlike API, seems to be universally increasing over time across PADDs. Since predicting  
676 such dynamic change of crude production/movement is beyond the capacity of this study, we  
677 developed two scenarios for both APIs and sulfur contents to capture potential future trend of crude  
678 qualities. Detailed results are presented in Figure S2 and Table S4.

#### 679 **Estimated U.S. Configurational Crude input.**

680 The increased adoption of EVs in the U.S. is expected to result in a decline in refineries' throughput  
681 as they adjust to changing fuel demands. Under a MD35 scenario, fuel demands are projected to  
682 decline from 5.54 to 3.74 Gbbl/y in 2035 and further to 3.04 Gbbl/y in 2050. Consequently, the  
683 projected U.S. refineries' throughput will decrease from 16.8 to 13.6 MMbbl/d in 2035 and further  
684 decline to 12.2 MMbbl/d in 2050 with heavy/sour crude input. A more severe reduction in refineries'  
685 throughput could occur if a greater number of EVs are sold in 2050 (i.e., LD50 scenario), with the  
686 total refinery crude input dropping to 8.79 MMbbl/d in 2050, equivalent to only 52.3% of the 2019  
687 level. However, the total refinery crude input could potentially increase from HD35 to HD50 (16.0  
688 vs 16.2 MMbbl/d), as production in PADD 3 and 5 is projected to increase from 2035 to 2050 (see  
689 Figure S4). Such an increase is largely driven by differing rates of change in product demand and  
690 production across regions between the HD35 and HD50 scenarios (Table S2). For example, in  
691 PADD 1, gasoline demand decreases by 78.8 MMbbl/y, yet production drops by only 27.4 MMbbl/y.  
692 Similarly, in PADD 3, ULSD production increases by 52.9 MMbbl/y, even though demand rises by  
693 just 16.2 MMbbl/y. These regional imbalances between demand and production for specific  
694 products contribute to the observed discrepancy: while total fuel demand declines by 33 MMbbl/y,  
695 overall refinery production increases by 67 MMbbl/y.

696 Deep conversion refineries will continue dominating U.S. refining sector regardless of changes in  
697 crude quality and product slates. For instance, the volume proportion of hydroskimming refineries  
698 will increase by 7.34% (3.02% to 10.4%) if it is for a LD35 scenario with a light and sweet crude  
699 input, whilst the volume share of deep conversion refineries could drop by 13.6% (70.6% to 57.0%).  
700 The volume shares of each refinery configuration are likely to remain relatively stable, indicating  
701 that the configurational portfolio is unlikely to change drastically if refiners continue to follow their  
702 previous investment patterns. The quality of crude will slightly impact future refinery crude input. In  
703 general, deep conversion refineries are more favorable for heavy/sour crude input compared to  
704 light/sweet input. Under a MD35 scenario, the volume percent of crude processed by deep  
705 conversion refineries are 7.1% higher for light and sweet crude input compared to heavy and sour  
706 crude input (62.3% vs. 55.2%).

707 The data presented above indicates a significant decrease in the utilization rate of refineries in the  
708 United States in the future. Under a MD50 scenario, the refinery crude input in 2050 is projected to  
709 be 72.7% of 2019, resulting in a utilization rate slightly above 70% for the entire U.S. refining sector.  
710 Refiners are typically required to maintain a utilization rate above 65-70% for safety reasons, and  
711 therefore, the shutdown of certain process units or even entire refineries is likely to occur.

712 As stated by Jiang (47) and Chen (48), the survival of individual refineries will depend on age, size,  
713 complexity index, geographic location, interest rate, crude and product prices, and others. The  
714 documented data from OGJ (20) shows that 41 shutdowns (including temporary shutdowns) have  
715 occurred since 1999, with 27 of them happening for refineries with a capacity between 10,000 to  
716 99,999 MMbbl/d (see Table S31). Refinery configuration also impacts the refiner's decision to shut  
717 down their facilities, with 26 out of 41 shutdowns happening for configuration 0 only. Additionally,  
718 27 of those shutdowns occurred in PADD 3 (a total of 12 refineries) and 5 (a total of 15 refineries),  
719 indicating that most shutdowns may happen in these regions as their markets are more competitive  
720 than other regions.

721 Hence, it is reasonable to assume that U.S. refiners may prefer to first shut down some of their  
722 hydroskimming refineries with lower capacity, as the financial losses would be smaller.  
723 Medium/Deep conversion refineries are too significant to fall, and thus refiners are more likely to  
724 downgrade/upgrade their process units rather than shut down the entire refinery to adapt to future  
725 market demands.

## 726 **Supplemental Result 2 – GHG Emissions from U.S. Refineries**

### 727 **U.S. Refining Sector GHG Emissions/Energy Consumption Baseline in 2019.**

728 The U.S. refining sector emitted over 212 Mt CO<sub>2</sub>eq/y in 2019, according to preliminary estimates  
729 by PRELIM (see Figure S14). The majority of these emissions, approximately 56.1% (i.e., 119 Mt  
730 CO<sub>2</sub>eq/y), result from fuel combustions, while approximately 13.6% (28.9 Mt CO<sub>2</sub>eq/y) result from  
731 FCC coke burn-off. The sector's total on-site energy consumption was estimated to be 2828 PJ/y,

732 less than the EPA's previous estimate of 3400 PJ/y for 2006. PRELIM's calculation of GHG  
733 emissions accounts for the assumption that all hydrogen and steam consumed by refineries are  
734 produced on-site through steam methane reformer and steam boiler facilities, and electricity is  
735 exclusively purchased from natural gas power plants. In addition, emissions resulting from natural  
736 gas upstream activities, including extraction and transportation, as well as electricity generation,  
737 are included in the estimates. Although there is a slight variation between PRELIM's estimation and  
738 the EPA's reported emissions, PRELIM's estimated emissions are relatively consistent with the  
739 EPA's reported emissions for 2019 (212 Mt CO<sub>2</sub>eq/y versus 165 Mt CO<sub>2</sub>eq/y). Therefore, to  
740 maintain internal consistency in this study, we have chosen to use PRELIM's estimates as our  
741 baseline. The configuration of the U.S. refining sector varies across PADD, with medium conversion  
742 refineries (configuration 1) being the dominant configuration in PADD 1, and deep conversion  
743 refineries (configuration 4 for PADD 2 and PADD 4, configuration 6 for PADD 3 and PADD 5) being  
744 the predominant configuration in the other four PADDs. However, deep conversion refineries are  
745 responsible for the majority of greenhouse gas (GHG) emissions in the United States, contributing  
746 to approximately 73.1% (155 Mt CO<sub>2</sub>eq/y) of emissions. Among deep conversion refineries,  
747 configuration 6 refineries account for almost two-thirds of these emissions (101 Mt CO<sub>2</sub>eq/y), with  
748 configuration 4 refineries contributing the remaining one-third (50.3 Mt CO<sub>2</sub>eq/y). In contrast,  
749 medium and hydroskimming refineries only account for 26% (55.6 Mt CO<sub>2</sub>eq/y) and 1.98% (4.21  
750 Mt CO<sub>2</sub>eq/y) of GHG emissions, respectively. Configuration 1 and configuration 3 are responsible  
751 for the highest GHG emissions among medium conversion refineries, contributing 25.1 and 22.1  
752 Mt CO<sub>2</sub>eq/y, respectively. The predominance of FCC units indicates that the majority of U.S.  
753 refineries are oriented toward gasoline production, which may pose challenges for refiners  
754 attempting to reduce gasoline output. Although the share of each type of refinery configuration is  
755 similar, regional GHG emissions remain relevant to total refinery production. PADD 3, which emits  
756 the most among the five regions, accounts for 52.8% (112 Mt CO<sub>2</sub>eq/y) of total U.S. refining sector  
757 emissions, with deep conversion refineries contributing 57% (63.4 to 112 Mt CO<sub>2</sub>eq/y) of regional  
758 emissions. PADD 4, on the other hand, has the lowest emissions of all the regions, emitting only  
759 7.91 Mt CO<sub>2</sub>eq/y.

#### 760 **U.S. Refining Sector GHG Emissions under Different Transportation Fuel Demand** 761 **Scenarios.**

762 The estimated GHG emissions from the U.S. refining sector under varying transportation fuel  
763 demand scenarios and crude input qualities are presented in Figure S15 and Table S13. The  
764 analysis indicates that GHG emissions for light/sweet crudes are comparable to those for  
765 heavy/sour crudes. As fuel demand decreases from 5.54 to 4.71 Gbbl/y (i.e., from the BL to LD35  
766 scenario), GHG emissions decline from 212 to 208 Mt CO<sub>2</sub>eq/y for heavy/sour crude and from 212  
767 to 198 Mt CO<sub>2</sub>eq/y for light/sweet crude. However, under both crude quality conditions, sectoral  
768 GHG emissions exhibit a slight increase (from 208 to 211 Mt CO<sub>2</sub>eq/y and from 198 to 204 Mt

769 CO<sub>2</sub>eq/y for heavy/sour and light/sweet crude, respectively) as fuel demand further declines from  
770 4.71 Gbbl/y to 4.58 Gbbl/y. This increase is primarily attributed to the projected rise in crude input  
771 volumes from the LD35 to LD50 scenario (i.e., from 15,767 to 16,218 mmbbl/y for light/sweet  
772 crude).

773 Additionally, sectoral GHG emissions for light/sweet crude consistently remain lower than those for  
774 heavy/sour crude. For instance, the U.S. refining sector is estimated to emit 204 Mt CO<sub>2</sub>eq/y when  
775 processing light/sweet crude, which is approximately 7 Mt CO<sub>2</sub>eq/y lower than the emissions  
776 observed when processing heavy/sour crude. This disparity arises because processing light/sweet  
777 crude requires less energy, as it involves less heat to convert long-chain hydrocarbons into short-  
778 chain, high-value products and less hydrogen to remove sulfur content (See Figure S16).

### 779 **Supplementary Result 3 - CO<sub>2</sub> Avoidance Costs for Different Carbon Capture** 780 **Strategies.**

781 The CO<sub>2</sub> avoidance cost varies significantly depending on different process units, refinery  
782 configurations, locations, years, and fuel demand scenarios. However, it appeared that the lowest  
783 CO<sub>2</sub> avoidance cost will always be achieved by FCC units in deep conversion refineries from  
784 PADD3, regardless of year and fuel demand scenarios. For example, the lowest CO<sub>2</sub> avoidance  
785 costs when facing a heavy/sour crude input are 86.4, 86.9, 85.2, 84.3, 84.9 and 84.7 \$/tCO<sub>2</sub>, for  
786 LD35, LD50, MD35, MD50, HD35 and HD50 scenarios respectively. In fact, FCCs are estimated  
787 to be the cheapest process units to deploy carbon capture. For example, most cases (118 out of  
788 172, 68.6%) of minimum CO<sub>2</sub> avoidance costs are achieved by FCC under a heavy/sour crude  
789 scenario, ranging from 84.2 to 440 \$/tCO<sub>2</sub>. This is attributed to two reasons. First of all, the large  
790 amount of GHG emissions produced by the units sparse the cost in most cases. Secondly, the CO<sub>2</sub>  
791 concentration in the exhaust gas from coke combustion is high, which reduced the size & energy  
792 consumption for the carbon capture unit.

793 Following FCC, SMR also presents significant potential for deploying carbon capture at a lower  
794 cost. 26 out of 172 cases (i.e., 15.1%) has the lowest CO<sub>2</sub> avoidance cost achieved by capturing  
795 from SMR. For instance, in HD35 scenario, the CO<sub>2</sub> avoidance cost for SMR could be as low as  
796 121 \$/tCO<sub>2</sub>, achieved in a medium conversion refinery in PADD 3. Among these 26 cases, the  
797 avoidance cost by capturing from SMR ranges from 120 – 239 \$/t CO<sub>2</sub>. A major factor contributing  
798 to the low cost of carbon capture on SMR is the high CO<sub>2</sub> concentration in its exhaust streams, a  
799 characteristic similar to that of the FCC. Still, our estimates on the CO<sub>2</sub> avoidance cost for capturing  
800 CO<sub>2</sub> from SMR are also higher than other literature (2, 49–57). In our modeling framework, CO<sub>2</sub> is  
801 assumed to be captured downstream of the reformer furnace, where tail gas from the pressure  
802 swing adsorption (PSA) unit is blended with natural gas and combusted to supply process heat.  
803 Typically, 3 gas streams are considered for carbon capture in SMR: i) the syngas stream to the  
804 hydrogen purification unit, characterized by the highest CO<sub>2</sub> partial pressure (~2.8 MPa); ii) the tail  
805 gas from the purification unit, with the highest CO<sub>2</sub> concentration (potentially up to ~50 mol%); and

806 iii) the flue gas from the reformer furnace, which has the highest CO<sub>2</sub> mass flow (3, 58). Capturing  
807 CO<sub>2</sub> from streams i) and ii) offers lower capture costs due to favorable pressure and CO<sub>2</sub>  
808 concentrations but limits the overall capture rate to approximately 50–60%. In contrast, capture  
809 from stream iii) enables higher overall capture rates - up to 90% -but incurs higher costs.  
810 Specifically, the reported CO<sub>2</sub> avoidance cost ranges from €47–66/t (i.e., \$57 – 81/t in 2019) for  
811 options i) and ii), while capture from the flue gas stream results in a cost of €70/t (i.e., \$87/t in  
812 2019).

813 Under the MD50 scenario (medium transportation fuel demand projected for 2050), the total  
814 emissions reduction potential from carbon capture across U.S. refineries is estimated at 94.0  
815 MtCO<sub>2</sub>/y. SMR contributes approximately 10.8 MtCO<sub>2</sub>/y, or 11.6% of the total—broadly consistent  
816 with values reported in the literature. Our analysis estimates a minimum CO<sub>2</sub> avoidance cost of  
817 \$107/t for SMR for capturing from furnace outlet, which is moderately higher than the \$87/t reported  
818 in Collodi et al (3). For capturing CO<sub>2</sub> from PSA inlet and outlet, the minimum CO<sub>2</sub> avoidance costs  
819 are 94.8 and 77.6 \$/t, respectively (see Table S33). Several reasons contribute to this discrepancy.  
820 First, our estimate incorporates the cost of CO<sub>2</sub> transportation and storage (approximately \$11/t  
821 combined), along with CO<sub>2</sub> leakage from pipelines (ranging from 11.3 ktCO<sub>2</sub>/y to 173 ktCO<sub>2</sub>/y),  
822 both of which are excluded in Collodi et al (3). Secondly, our CapEx assumptions are different.  
823 Following the approach of Gale et al (2), we include the cooling water and interconnecting sections  
824 for carbon capture unit. In Gale’s analysis, these components together account for approximately  
825 38% of total CapEx—\$62,200k out of \$163,000k. In our study, the interconnecting section alone  
826 accounts for 52% of total CapEx—\$317,000k out of \$614,000k. This is largely due to the higher  
827 CO<sub>2</sub> flow rate in our case (627 t/h vs. 102 t/h in Gale et al.), which significantly increases the scale  
828 and cost of shared infrastructure. Despite this, the difference in CO<sub>2</sub> avoidance cost between our  
829 study (\$107/t) and Collodi et al. (\$87/t) remains relatively modest. This is partly because Collodi et  
830 al. include the cost of building a standalone H<sub>2</sub> production facility, which accounts for 24% of their  
831 total CapEx—\$99,700k out of \$409,000k. This partially offsets the effect of our higher  
832 interconnection-related costs, resulting in broadly comparable cost estimates.

833 Our analysis further shows that CO<sub>2</sub> avoidance costs for SMR vary significantly across refinery  
834 configurations. While SMR is generally among the most cost-effective capture targets in deep  
835 conversion refineries, our absolute costs are somewhat elevated due to the inclusion of broader  
836 cost components. Importantly, SMR emissions vary with refinery H<sub>2</sub> demand, and in configurations  
837 with limited H<sub>2</sub> use, the poor economies of scale can render SMR a suboptimal capture target. For  
838 instance, in a medium conversion refinery with only FCC in PADD 4, the CO<sub>2</sub> avoidance cost for  
839 SMR is \$442/t, the highest among all units in that configuration, with only 10.0 ktCO<sub>2</sub>/y avoided. In  
840 contrast, the same configuration in PADD 3 results in a much lower cost of \$125/t, with 467 ktCO<sub>2</sub>/y  
841 avoided, making SMR the second most cost-effective unit for capture (FCC: \$115/t). More broadly,  
842 configurations with high H<sub>2</sub> consumption—such as deep conversion or medium conversion

843 refineries with hydrocrackers—consistently rank SMR as one of the lowest-cost capture options. In  
844 PADDs 3 and 5, SMR represents the least-cost capture unit in deep conversion refineries with  
845 hydrocrackers, with avoidance costs ranging from \$122–238/t. Conversely, in low-H<sub>2</sub> configurations  
846 (e.g., hydroskimming refineries, or medium and deep conversion refineries with only FCC), SMR  
847 can become the most expensive capture option. For instance, in hydroskimming refineries under a  
848 low fuel demand scenario in 2050, SMR capture costs reach \$1,890/t in PADD 1, \$311/t in PADD  
849 3, and \$2,800/t in PADD 4, with respective CO<sub>2</sub> avoidance potentials of 1.34 kt/y, 11.3 kt/y, and  
850 0.540 kt/y.

851 These additional factors contribute to a higher overall cost of avoidance compared to values  
852 typically reported in literature.

853 Other process units also exhibit potential for achieving the lowest CO<sub>2</sub> avoidance costs in specific  
854 refinery configurations. For example, 14.0% (24 out of 172) of the minimum CO<sub>2</sub> avoidance costs,  
855 ranging from 159 – 493 \$/tCO<sub>2</sub>, are achieved by hydrotreaters. All these cases occur in  
856 hydroskimming refineries, typically where other low-cost CO<sub>2</sub> avoidance units, such as FCC or  
857 SMR, are unavailable. Additionally, 3 instances of minimum CO<sub>2</sub> avoidance costs, ranging from  
858 262 – 552 \$/tCO<sub>2</sub> are achieved by ADU in hydroskimming refineries.

859 Contrastingly, the steam boiler is considered the most-costly process unit for CO<sub>2</sub> capture among  
860 various units in half of scenarios (86 out of 172). For instance, the CO<sub>2</sub> avoidance cost for a steam  
861 boiler is 156 \$/tCO<sub>2</sub>, while it is 84.3 \$/tCO<sub>2</sub> for FCC in MD35 scenario. The avoidance cost for  
862 capturing CO<sub>2</sub> from steam boilers ranges from 154\$/t CO<sub>2</sub> (configuration 6 in PADD3, HD35) to  
863 1313 \$/tCO<sub>2</sub> (configuration 0 in PADD2, MD35). This high expense is primarily due to its lower  
864 GHG emissions, which are only 0.001 to 1.26 kt/y of CO<sub>2</sub> avoided. Detailed results are presented  
865 in Figure S17 and Figure S18.

866 From a location-wise perspective, the lowest average CO<sub>2</sub> avoidance cost is achieved by refineries  
867 in PADD 3, 160\$/tCO<sub>2</sub>, under a HD50 scenario, while the highest average CO<sub>2</sub> avoidance cost is  
868 achieved in PADD 1, 519 \$/tCO<sub>2</sub>, under a LD50 scenario. The location factor considered in this  
869 study as well as the total amount of GHG emissions are the two major reasons that contribute to  
870 the difference in CO<sub>2</sub> avoidance cost between PADDs. Detailed results are shown in Figure S19  
871 and Figure S20.

872 A sensitivity analysis was also conducted to evaluate the impact of variability in CO<sub>2</sub> transport and  
873 storage costs on the overall avoidance cost. Figure S27 presents the distribution of CO<sub>2</sub> avoidance  
874 costs under low, baseline, and high cost assumptions for both transportation and storage. For  
875 transportation, the average avoidance cost increases modestly from 281 to 290 \$/tCO<sub>2</sub> across the  
876 low to high cost range, corresponding to transport cost assumptions of 2.09 - 10.5 \$/tCO<sub>2</sub>, reflecting  
877 variation in pipeline distance and system conditions (59). Similarly, for storage, the average  
878 avoidance cost increases from 283 to 312 \$/tCO<sub>2</sub> across a wider cost range of 1.49 - 30.9 \$/tCO<sub>2</sub>,  
879 representing the difference between onshore and offshore storage (60). The results indicate that

880 variations in CO<sub>2</sub> transport and storage costs lead to relatively limited changes in total avoidance  
881 cost, with increases of approximately 9 \$/tCO<sub>2</sub> for transportation and 29 \$/tCO<sub>2</sub> for storage between  
882 low and high scenarios. The influence of transport cost is relatively modest, whereas storage cost  
883 introduces a more noticeable shift. Overall, the magnitude and distribution of avoidance costs  
884 remain broadly consistent, suggesting that the main conclusions are preserved while confirming  
885 that transport and storage remain relevant factors that should be considered.

#### 886 **Supplementary Result 4 - Additional Results for Real Option Analysis**

##### 887 **Additional Real Option Results for Two Different Carbon Price Trajectories**

888 Under the A-CP scenario, the simulated mean carbon price reaches approximately 153 \$/tCO<sub>2</sub> by  
889 2033, increases to 252 \$/tCO<sub>2</sub> by 2043, and approaches 270 \$/tCO<sub>2</sub> by 2050. In contrast, under  
890 the D-CP scenario, the mean carbon price remains at approximately 85 \$/tCO<sub>2</sub> until 2036,  
891 increases to 145 \$/tCO<sub>2</sub> by 2040, and reaches 259 \$/tCO<sub>2</sub> by 2050. For comparison, the mean  
892 carbon price under the R-CP scenario reaches 150 \$/tCO<sub>2</sub> by 2034, 206 \$/tCO<sub>2</sub> by 2042, and 284  
893 \$/tCO<sub>2</sub> by 2050. Differences in the timing and shape of these carbon price trajectories result in  
894 modest but systematic changes in the modeled responses of refinery archetypes.

895 Figure S26 and Figure S27 shows that, across all carbon price scenarios, the hydroskimming  
896 refinery archetype continues to face a high likelihood of shutdown after the early 2030s, largely  
897 independent of the specific carbon price trajectory. Under the A-CP scenario, higher carbon prices  
898 at earlier stages do not incentivize CCS deployment for the hydroskimming archetype under less  
899 favorable market conditions (e.g., the medium fuel demand scenario). In contrast, medium and  
900 deep conversion refinery archetypes consistently exhibit a greater propensity to deploy CCS than  
901 the hydroskimming archetype across scenarios (See Figure S26).

902 Notably, the stepwise carbon price trajectory in the A-CP scenario—characterized by higher prices  
903 in earlier years—reduces the likelihood of shutdown for the medium conversion refinery archetype  
904 under the high fuel demand scenario relative to the other carbon price trajectories. Conversely,  
905 under the D-CP scenario, the medium conversion refinery archetype exhibits a higher shutdown  
906 risk under the high fuel demand scenario compared with the R-CP case, with the shutdown  
907 probability increasing from 5.08% to 16.2% by 2047, whereas it remains below 10% (8.45%) until  
908 2049 under the R-CP scenario (see Figure S27). This increase in shutdown likelihood is driven by  
909 the sudden escalation of carbon prices in the late 2030s and early 2040s, which imposes additional  
910 financial pressure on refineries during a period of tightening crack spreads relative to the 2020s  
911 and early 2030s. A similar increase in shutdown risk associated with delayed carbon price  
912 escalation is also observed for the deep conversion refinery archetype under low and medium fuel  
913 demand scenarios.

914 Overall, these results indicate that the qualitative insights regarding refinery shutdown risk and CCS  
915 deployment are broadly robust to differences in the timing and stepwise structure of carbon price  
916 escalation, provided that carbon prices continue to rise and converge to comparable levels by 2050.

#### 917 **Expected Total GHG Emissions by Selected Refinery Configurations.**

918 In 2019, the estimated total GHG emissions for hydroskimming (configuration 0), medium  
919 conversion: FCC & GO-HC (configuration 3), and deep conversion: FCC & GO-HC (configuration  
920 6) refineries were 3.40, 22.1, and 101 Mt CO<sub>2</sub>eq/yr, respectively. The likelihood of deploying carbon  
921 capture varies significantly across different transportation fuel demand scenarios, as detailed in  
922 Dataset 5, influencing expected GHG emissions accordingly. For instance, under a low fuel  
923 demand scenario (i.e., BL to LD35/50), the probability of deploying carbon capture in a  
924 hydroskimming refinery remains extremely low, not exceeding 0.005% until 2028, peaking at 0.08%  
925 in 2033, and diminishing by 2048. Concurrently, the probability of refinery shutdown increases from  
926 0% to 20.6% between 2027 and 2028, and then sharply to 99.9% by 2029. This shift leads to a  
927 marked reduction in total GHG emissions from the hydroskimming refinery, which initially increase  
928 from 3.40 to 6.03 Mt CO<sub>2</sub>/year from 2019 to 2027 due to capacity expansion (from 507 to 862  
929 MMbbl/d), before abruptly dropping to 5.06 Mt CO<sub>2</sub>/year by 2028 and then to 0.008 Mt CO<sub>2</sub>/year by  
930 2029. Conversely, in a medium fuel demand scenario (i.e., BL to MD35/50), the percentage of  
931 deploying carbon capture at a hydroskimming refinery surged from 0% to 19.2% between 2021 and  
932 2022, gradually reaching a peak of 53.7% by 2030, and then declining to negligible levels by 2046.  
933 Simultaneously, the likelihood of shutting down the refinery escalated from 0% to 97.1% by 2031  
934 and continued to increase until it reached 100% by 2047. Despite a significant expansion in refinery  
935 capacity from 507 to 1093 MMbbl/d, these changes lead to a gradual increase in GHG emissions,  
936 from 3.40 Mt CO<sub>2</sub>/year in 2019 to 5.35 Mt CO<sub>2</sub>/year by 2030. Given the higher probability of  
937 deploying carbon capture, a less steep reduction in GHG emissions is noted as fuel demand  
938 increases. Notably, between 2028 and 2030, there is a marked increase in the likelihood of  
939 transitioning from continued operation to shutting down the refinery for hydroskimming refinery.  
940 This suggests that the window for considering carbon capture as a viable option is preferable before  
941 this critical time point.

942 A two-stage reduction in GHG emissions is observed in the deep conversion refinery as well. GHG  
943 emissions remained above 105 Mt CO<sub>2</sub>/year from 2019 to 2021. In 2022, a sudden drop to 93.8,  
944 95.9, and 99.2 Mt CO<sub>2</sub>/year for the low, medium, and high fuel demand scenarios, respectively,  
945 was induced by an increased probability of deploying carbon capture. Subsequently, emissions  
946 further declined to 2.97 Mt CO<sub>2</sub>/year in 2031, 6.07 Mt CO<sub>2</sub>/year in 2032, and 24.3 Mt CO<sub>2</sub>/year in  
947 2036 for low, medium and high fuel demand scenario, respectively. This trend precedes another  
948 steep decline triggered by a rising probability of refinery shutdown.

949 As indicated in Figure S21, it is projected that the expected GHG emissions will likely align with the  
950 sectoral net-zero goal by 2050, and by 2100 for all configurations. However, achieving the net-zero

951 goal by 2035 appears unlikely. Although expected GHG emissions do not directly represent the  
952 actual future changes in emissions by the U.S. refining sector—owing to the dynamic market  
953 affected by individual refinery decisions—we can still derive insights into future emission trends.  
954 The GHG emissions from the U.S. refining sector are expected to decline, facilitated by increased  
955 utilization of low-carbon technologies within a specific timeframe. As market conditions evolve,  
956 operating refineries may become unprofitable, prompting refiners to consider shutting down or  
957 exiting the market. A massive closure of refineries will lead to a shortage in the supply of refinery  
958 products in the U.S. market (see Figure S22). This gap between supply and demand will likely be  
959 bridged by increasing imports and boosting domestic production. Consequently, the sectoral GHG  
960 emissions are unlikely to reach net-zero before 2050, indicating that additional efforts are  
961 necessary to achieve net-zero emissions within the refining sector.

962 It is also worth noting that while this study assesses how a refinery could react to economic signals  
963 (i.e., the expected present value changes driven by carbon pricing) reflecting how aggressively  
964 society may pursue decarbonization, the specific mechanism by which this signal is delivered can  
965 vary. Rather than a simple carbon price, it could be implemented via tax incentives (e.g., under the  
966 Inflation Reduction Act), other carbon pricing mechanisms, or performance-based regulations.  
967

968 **Figures**

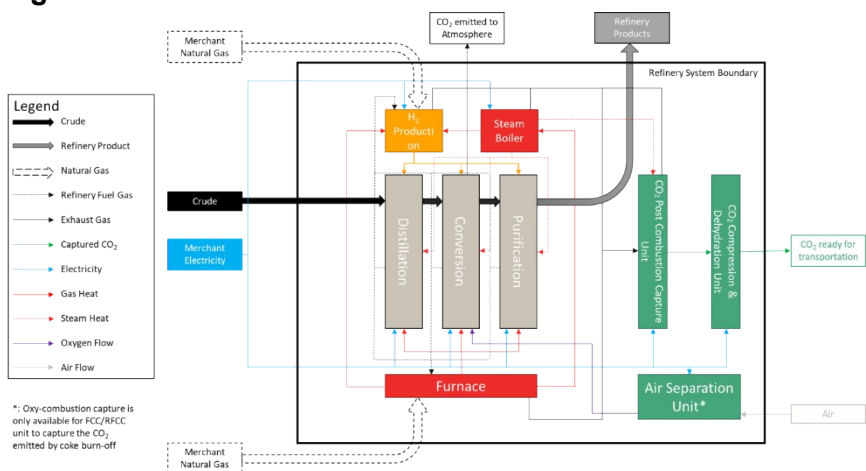

969

970 Figure S1. PRELIM and Carbon Capture Module

971

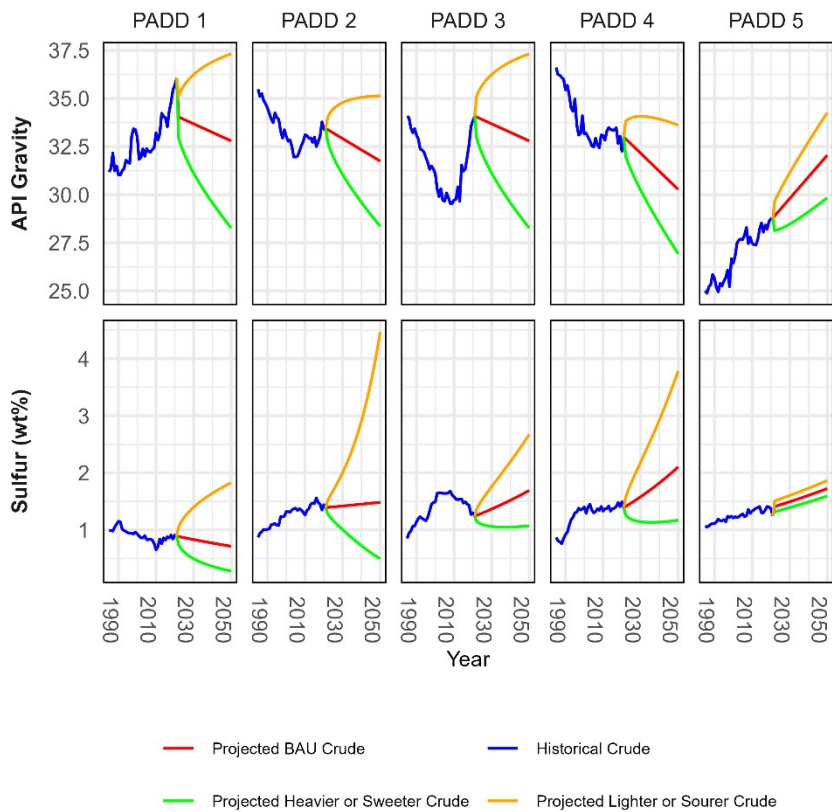

972

973

974 Figure S2. Projected Crude Qualities Using ETS

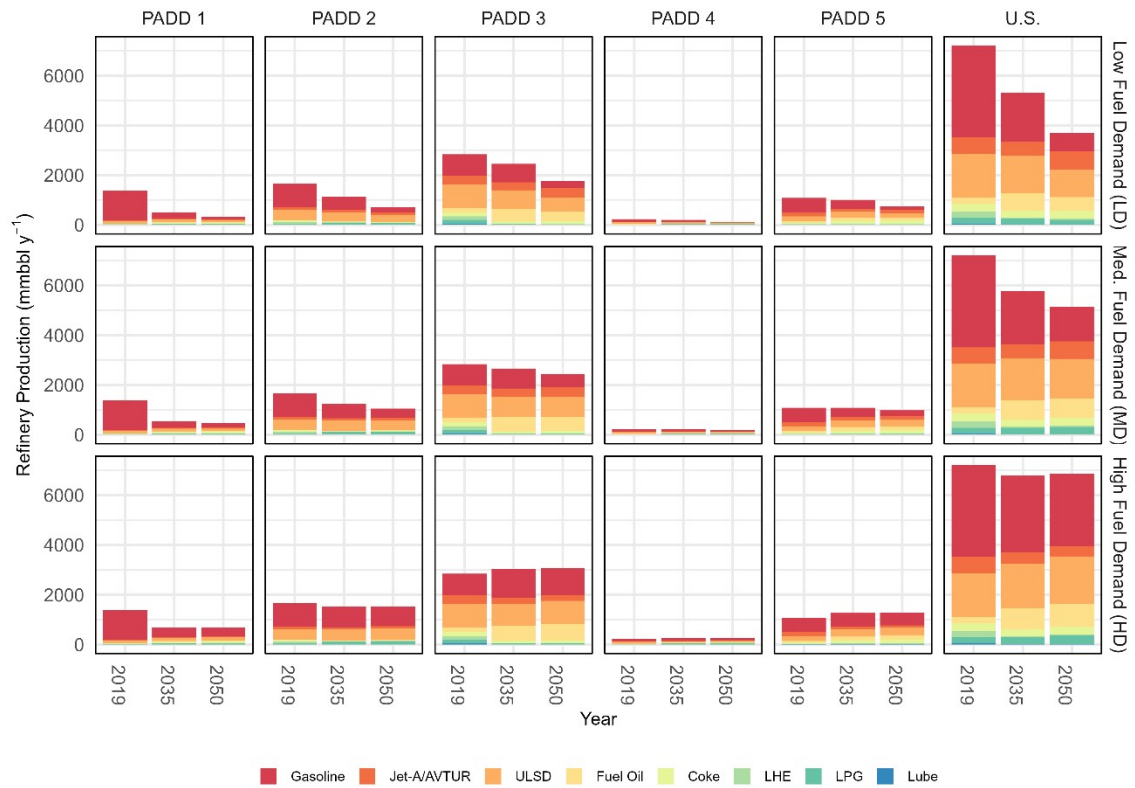

976

977 Figure S3. Projected U.S. Refinery Product Slates under Different Transportation Fuel Demand Scenarios.

978

**A. Projected Volume of Heavy/Sour Crude Processed by the U.S. Refining Sector**

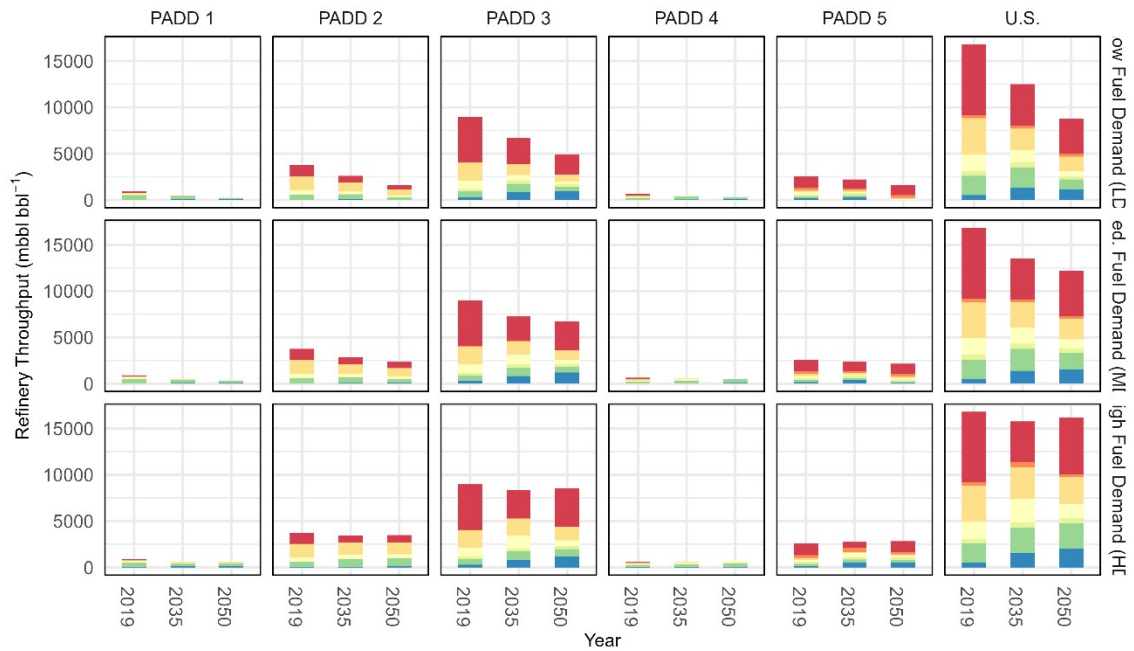

**B. Projected Volume of Light/Sweet Crude Processed by the U.S. Refining Sector**

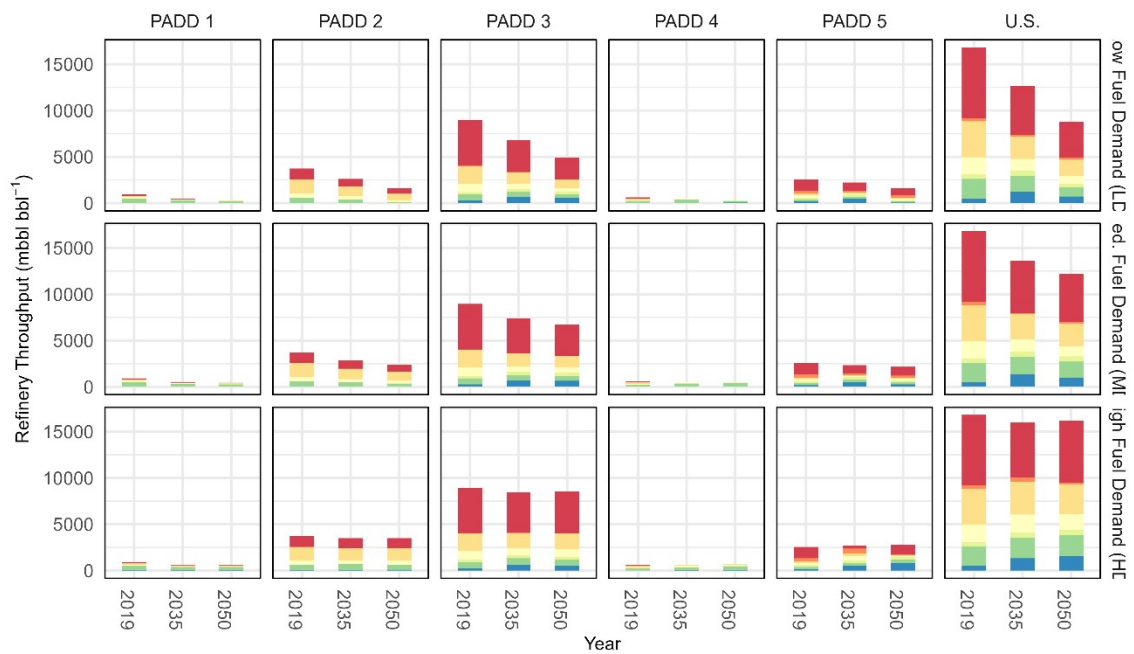

979  
 980 Figure S4. Estimated Future U.S. Refineries Crude input Changes. a) Light/Sweet Crude; b) Heavy/Sour  
 981 Crude.  
 982

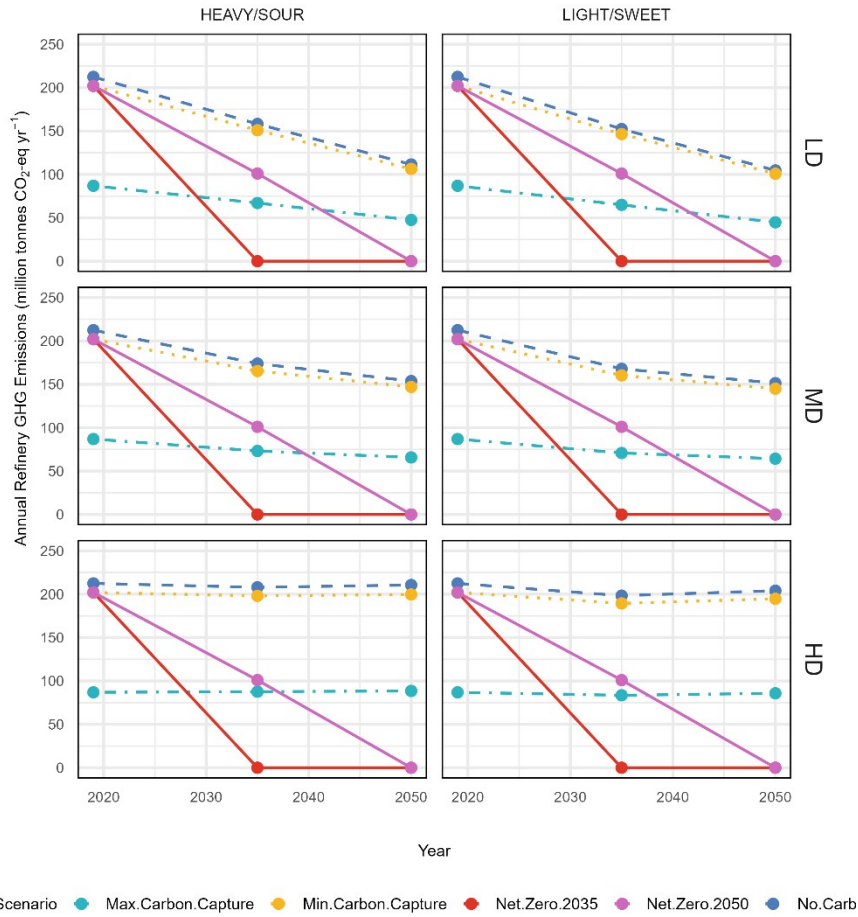

983

984 Figure S5. Estimated Annual U.S. Refineries GHG Emissions based on Different Decarbonization Goals.

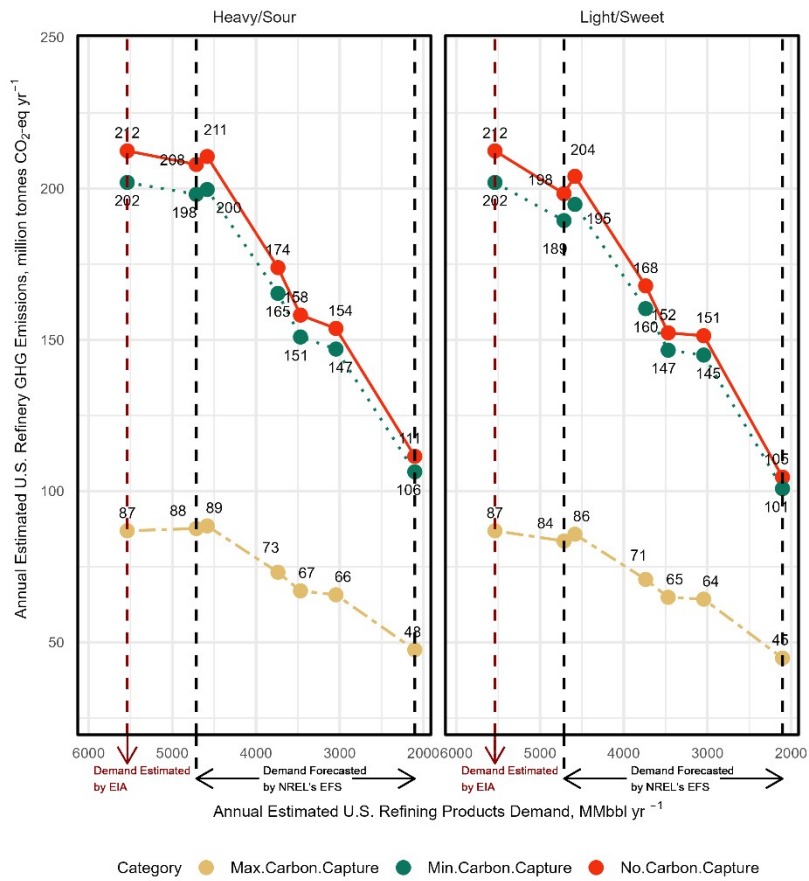

985  
 986 Figure S6. Annual Estimated GHG Emissions for U.S. Refining Sector under Different Refining Product  
 987 Demands.  
 988

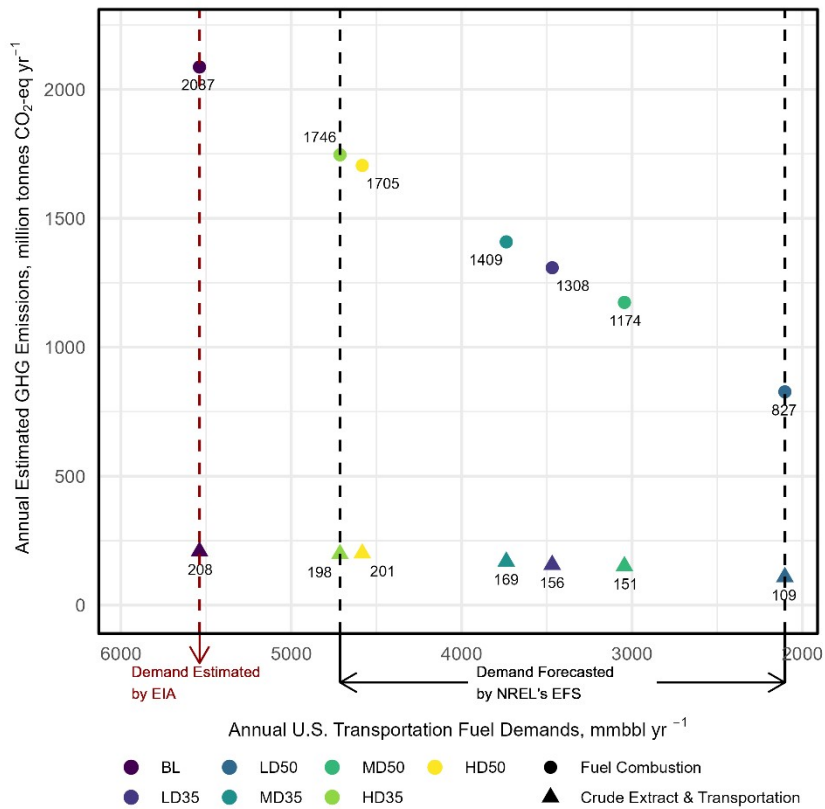

989  
 990 Figure S7. Estimated Annual GHG Emissions by Direct Combustion of Transportation Fuels and Crude  
 991 Extraction and Transportation under Different Fuel Demand Scenarios.  
 992

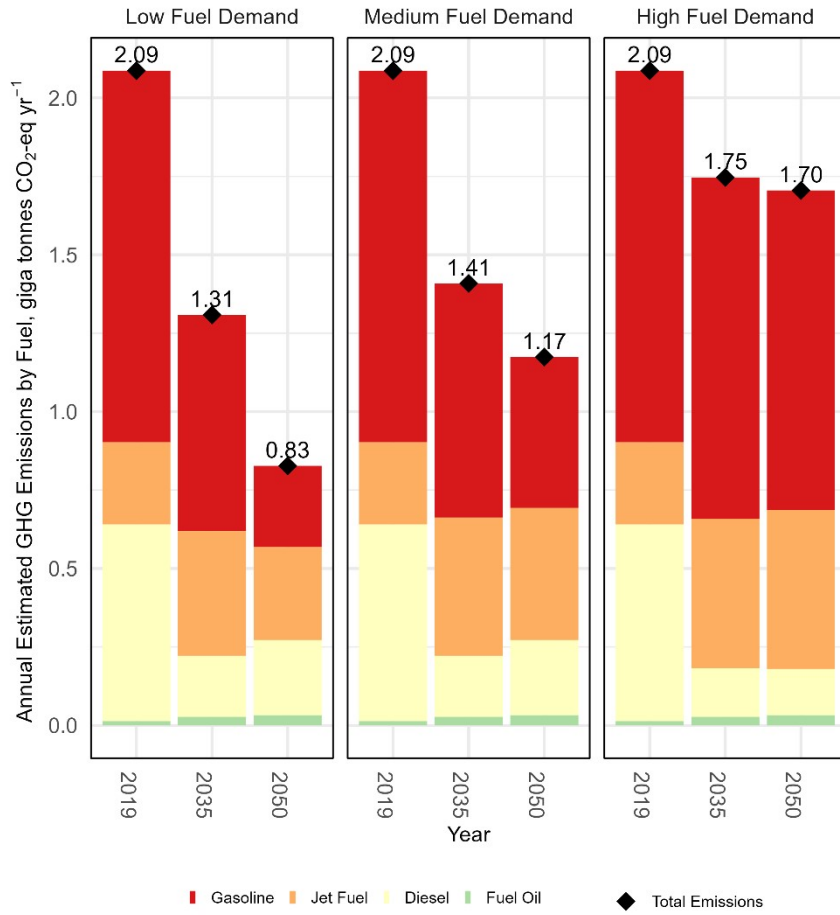

993

994 Figure S8. Breakdown of Estimated Annual GHG Emissions by Direct Combustion of Transportation Fuels  
 995 under Different Fuel Demand Scenarios.  
 996

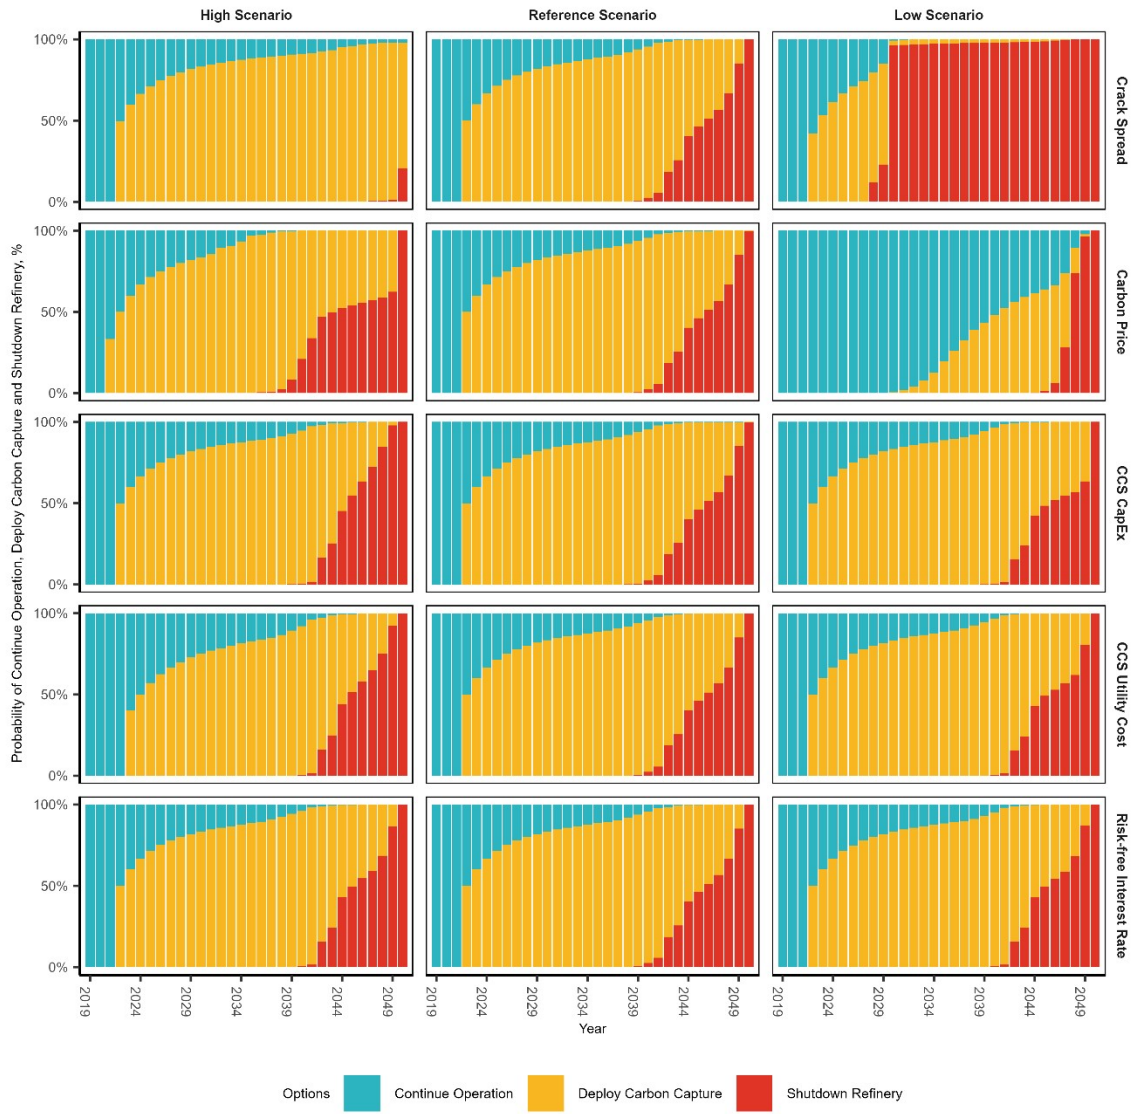

997  
 998  
 999  
 1000  
 1001

Figure S9. Sensitivity Analysis on Real Option

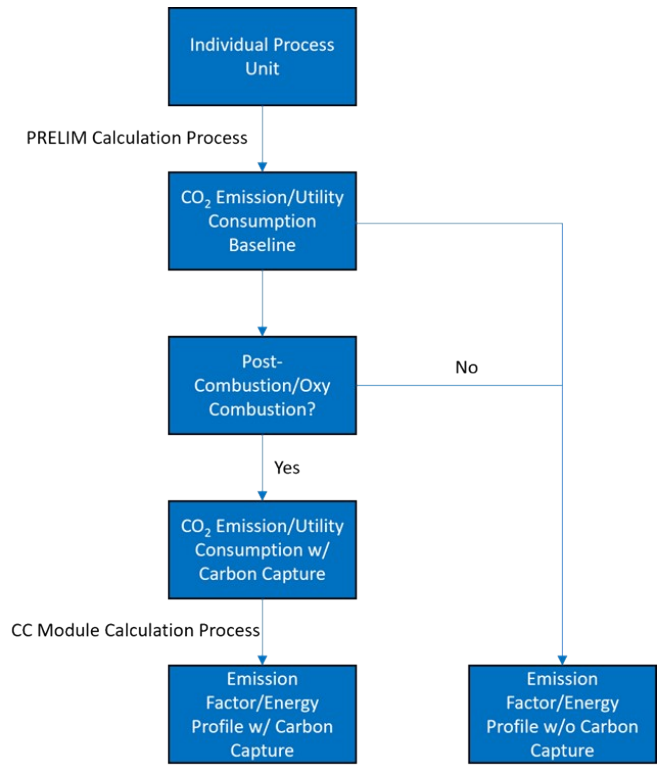

1002  
 1003 Figure S10. The General Computing Process for Carbon Capture Module  
 1004

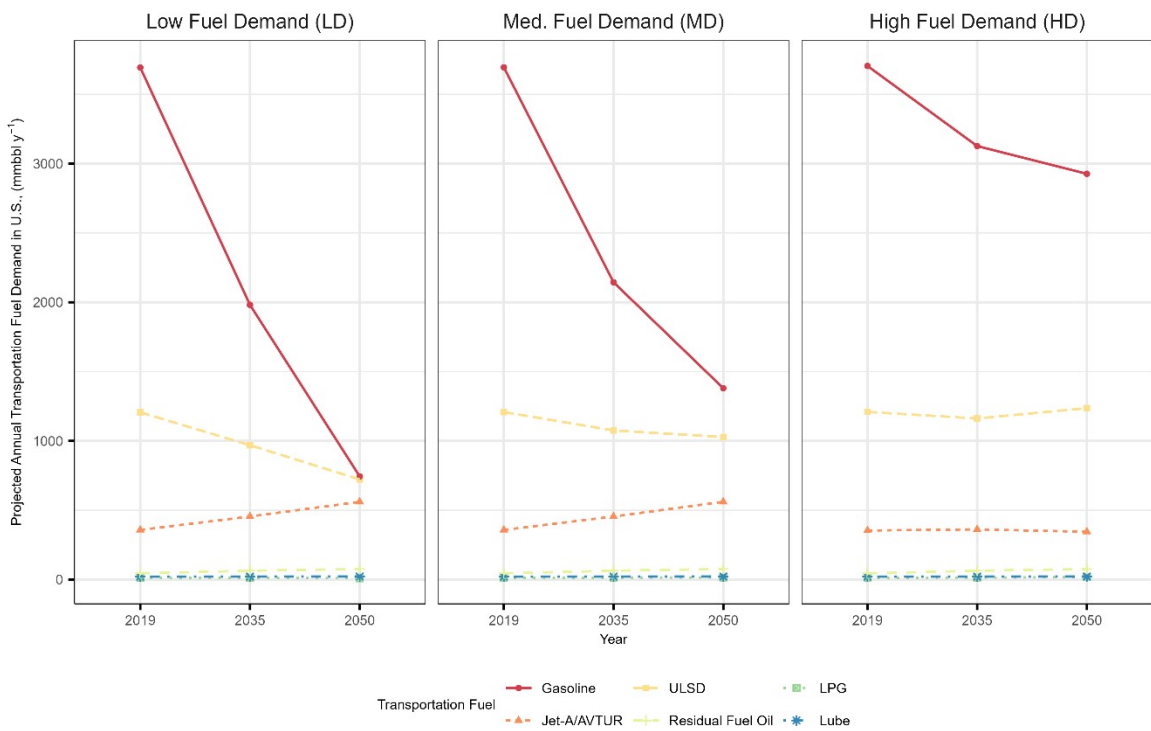

1005  
 1006 Figure S11. Projected Annual Transportation Fuel Demand in the U.S. from 2019 to 2050.  
 1007

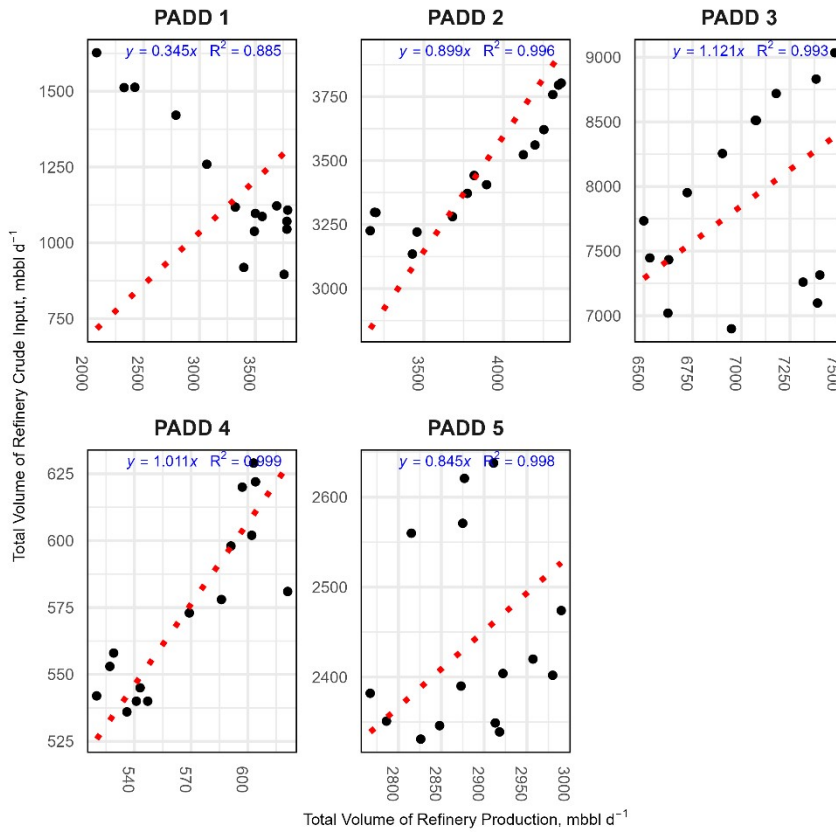

1008

1009 Figure S12. Linear Correlations between Refinery Historical Input and Output

1010

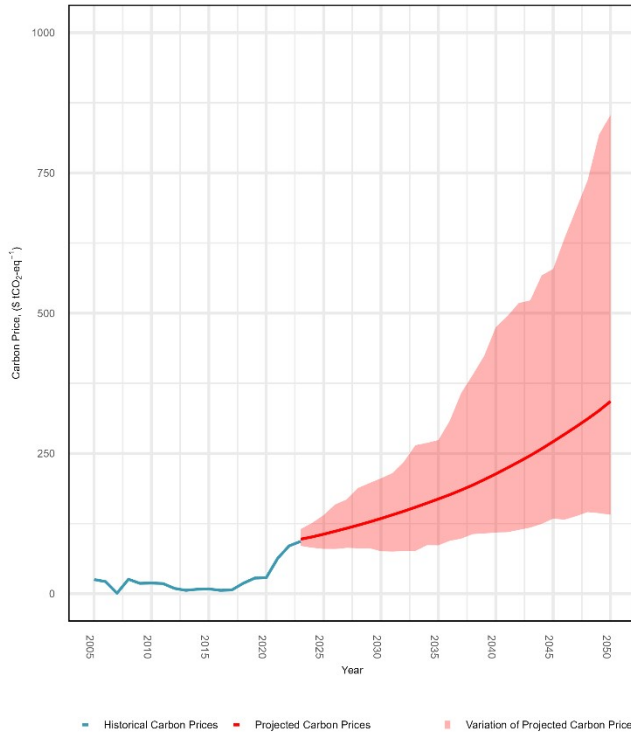

1011  
1012  
1013

Figure S13. Simulated Carbon Price Following a GBM Process

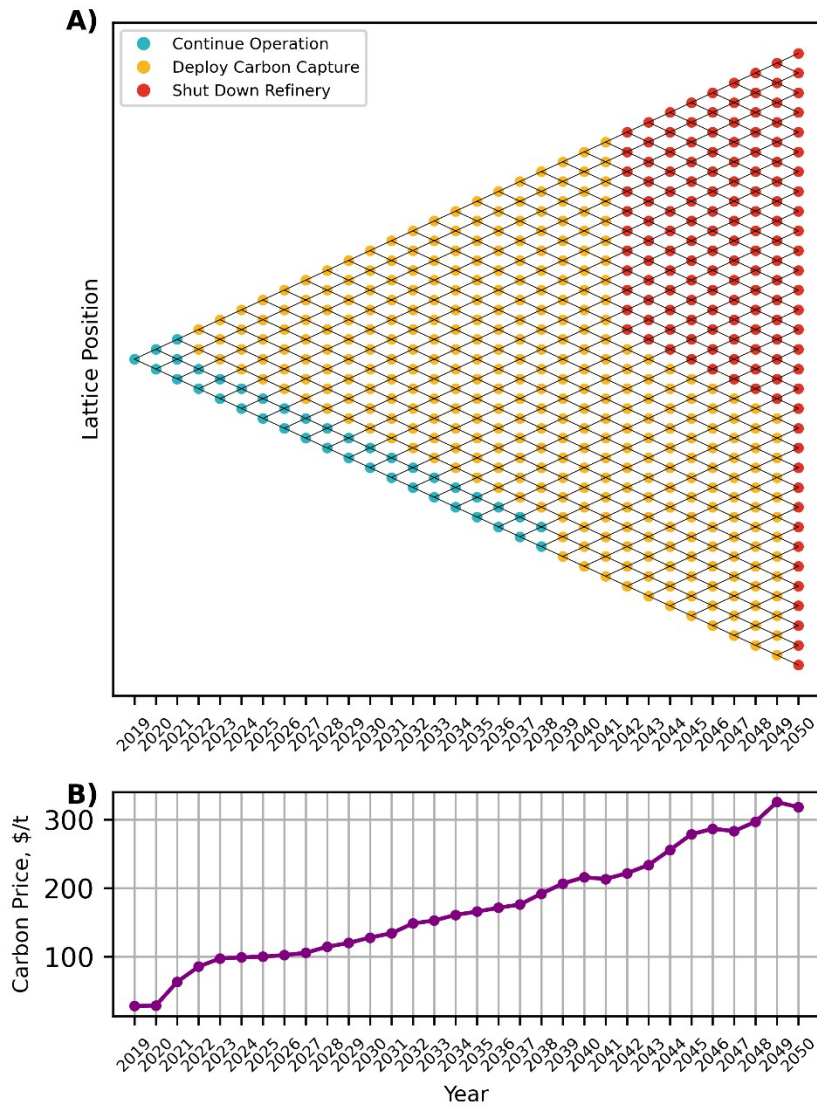

1014

1015 Figure S14. An Established Binomial Decision Tree for a Specific Carbon Price Trajectory.

1016

1017

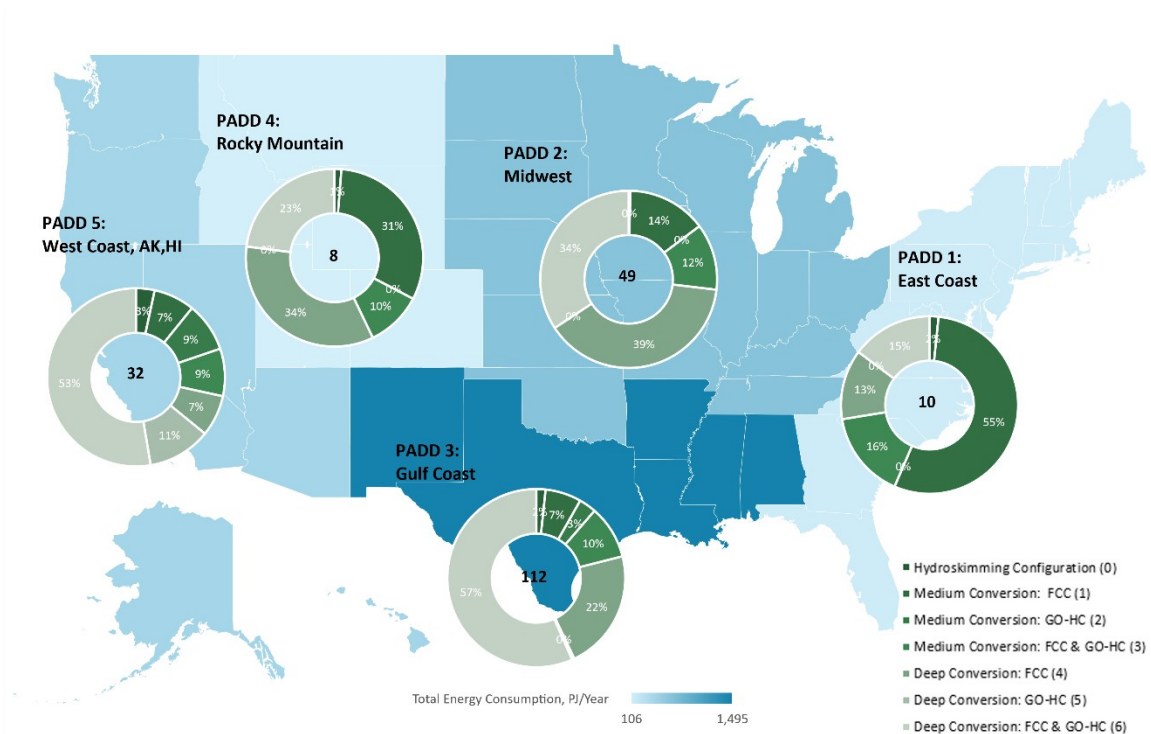

1018

1019 Figure S15. 2019 U.S Refining Sector Emission & Energy Consumption Profile. The opacity of the map  
 1020 indicates the annual refinery energy consumption for each region, PJ/y. The pie chart indicates the share of  
 1021 GHG emissions by each type of refinery configuration in the region. The numbers in the circle indicate daily  
 1022 GHG emissions from refineries in each region, MMtCO<sub>2</sub>eq/d.

1023

1024

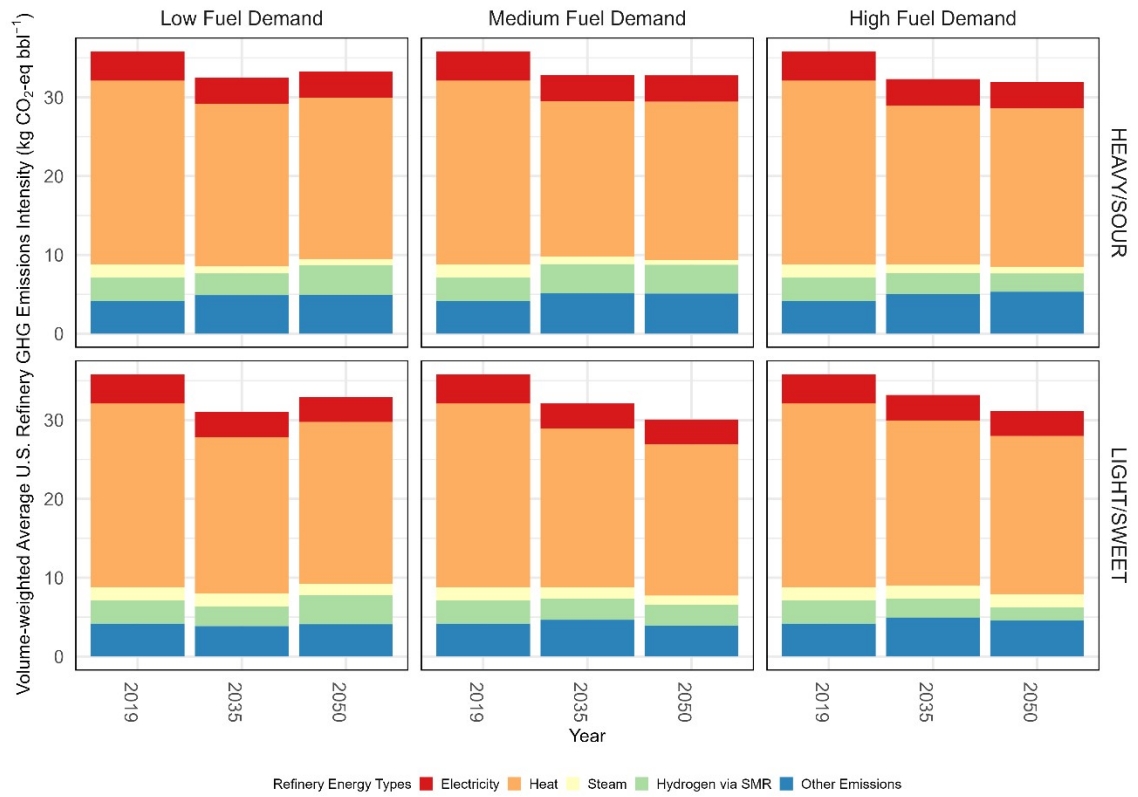

1025  
 1026 Figure S16. Projection on Refinery Emissions Intensity under Various Transportation Fuel Demand and  
 1027 Different Crude Qualities.  
 1028

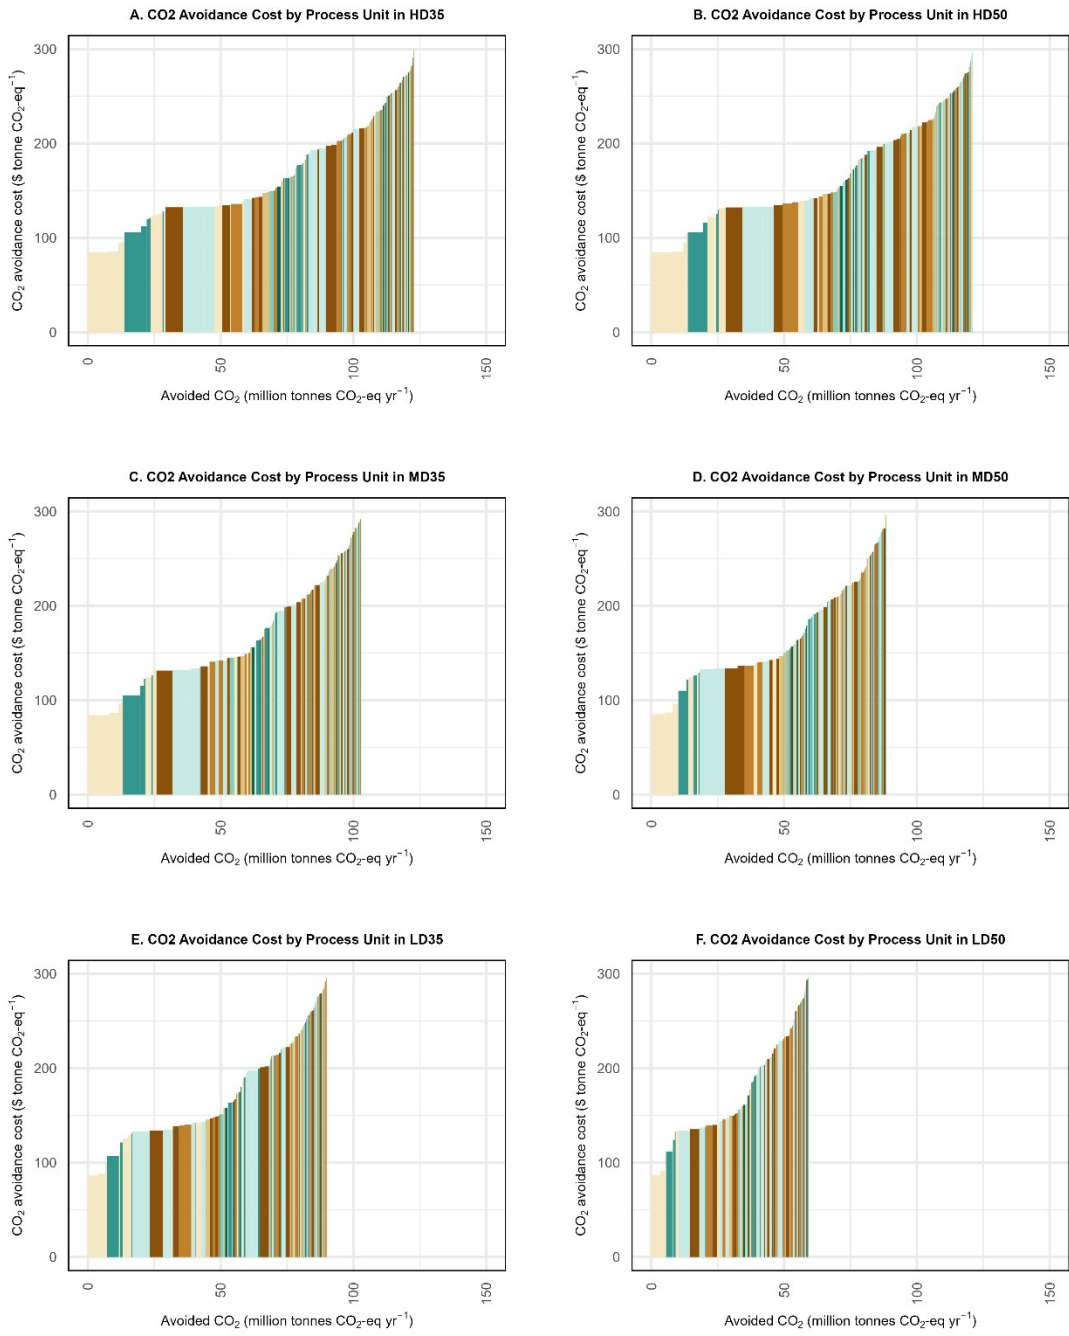

1029  
 1030 Figure S17. CO<sub>2</sub> Avoidance Cost Curve for Heavy/Sour Crudes  
 1031

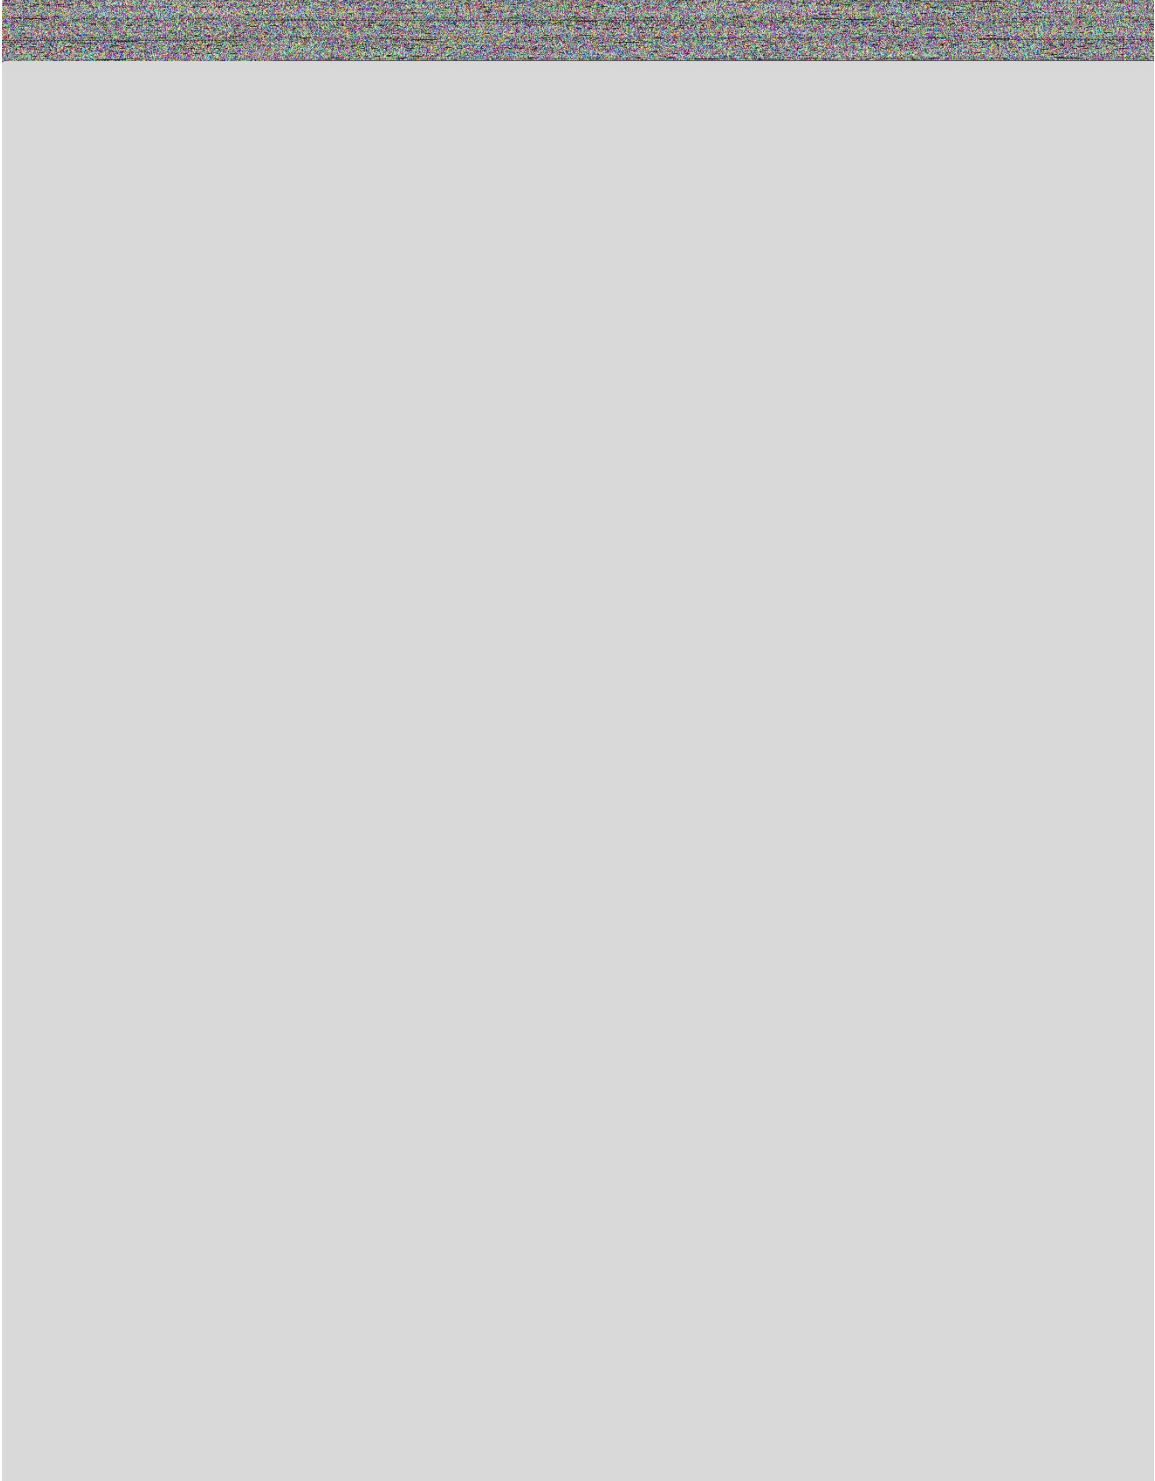

1032  
1033 Figure S18. CO<sub>2</sub> Avoidance Cost Curve for Light/Sweet Crudes  
1034



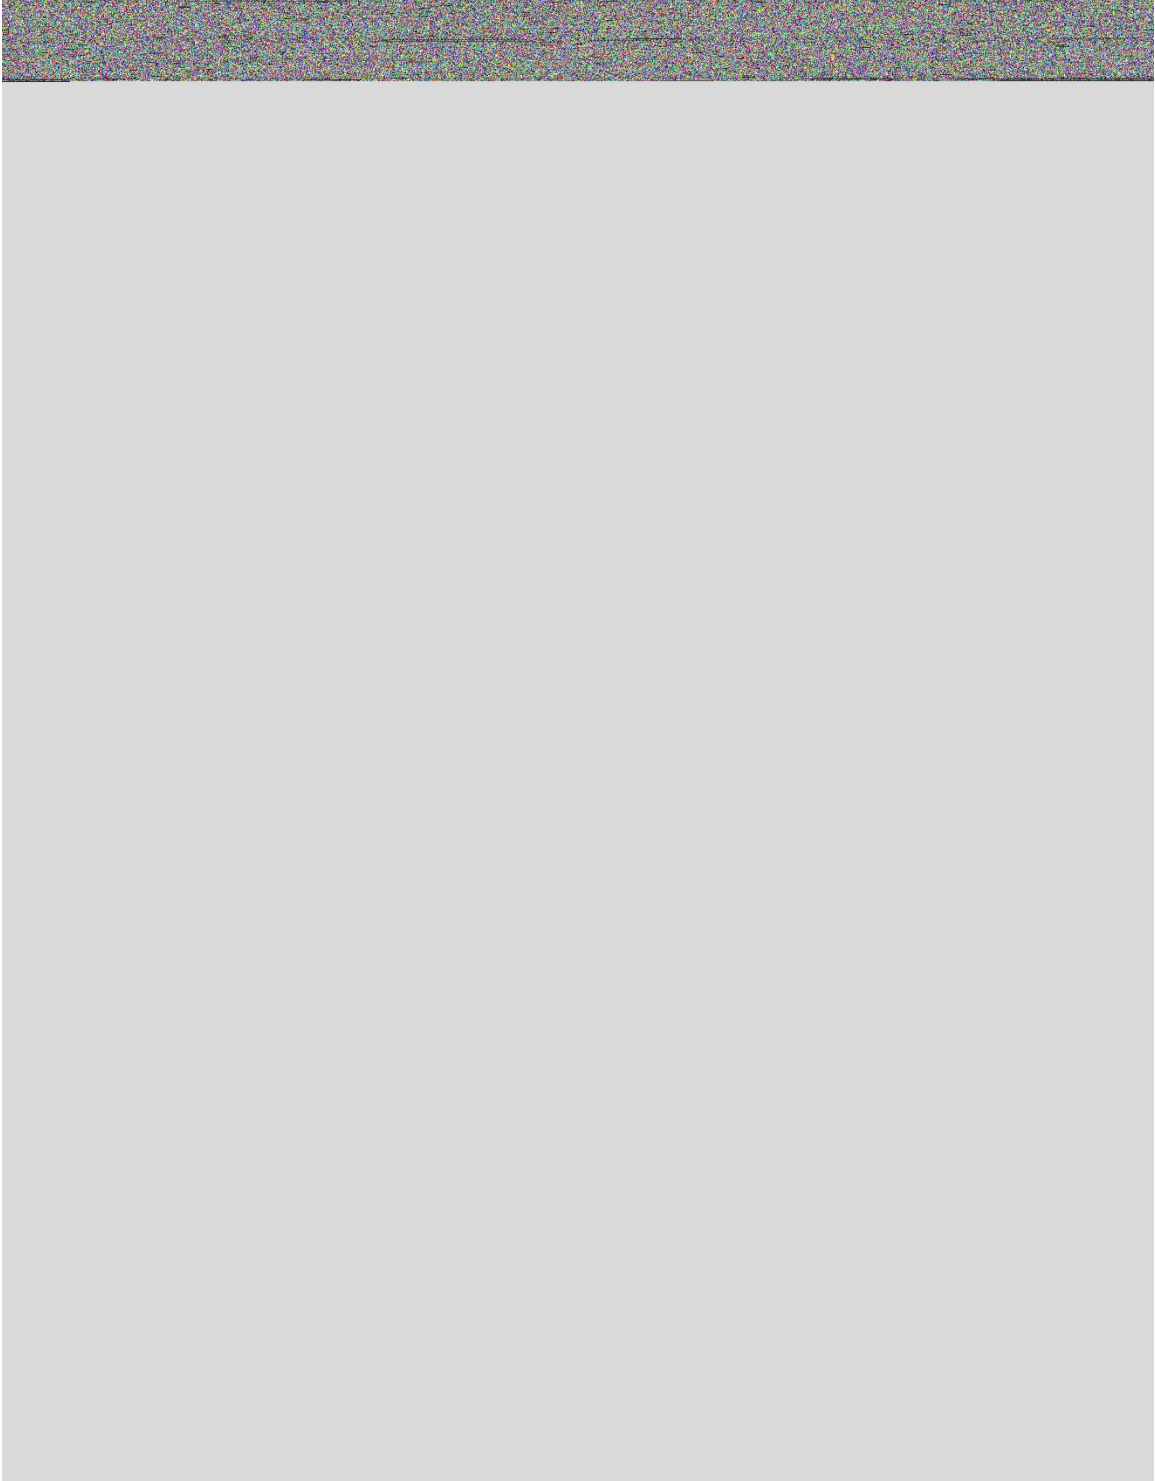

1038  
1039  
1040  
1041

Figure S20. Distribution of CO<sub>2</sub> Avoidance Cost across Refinery Configurations for Light/Sweet Crudes

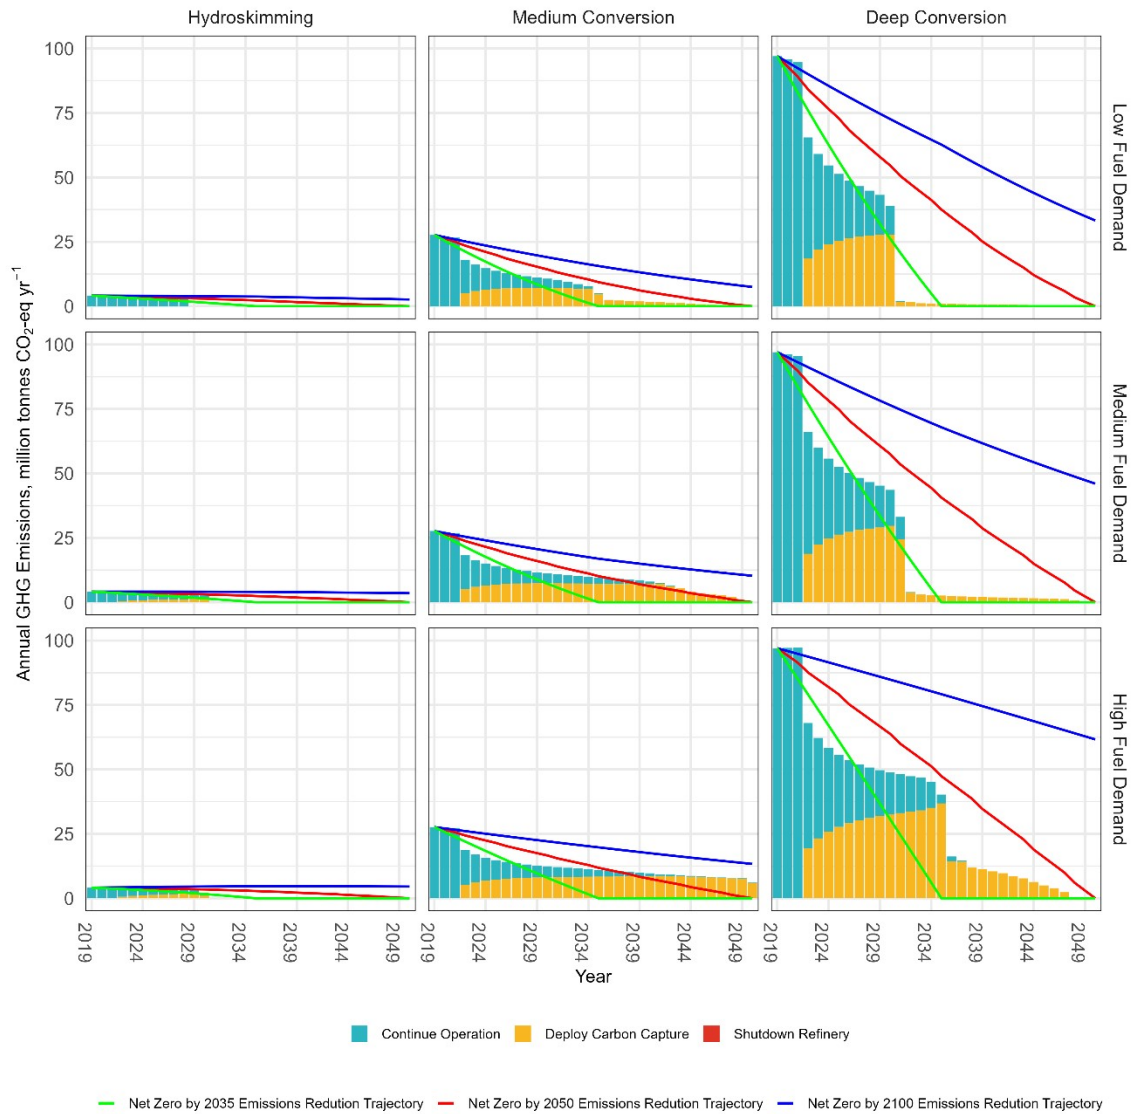

1042

1043 Figure S21. Expected U.S. GHG Emissions by Selected Refinery Configurations based on Likelihoods of  
 1044 Different Strategic Options.

1045

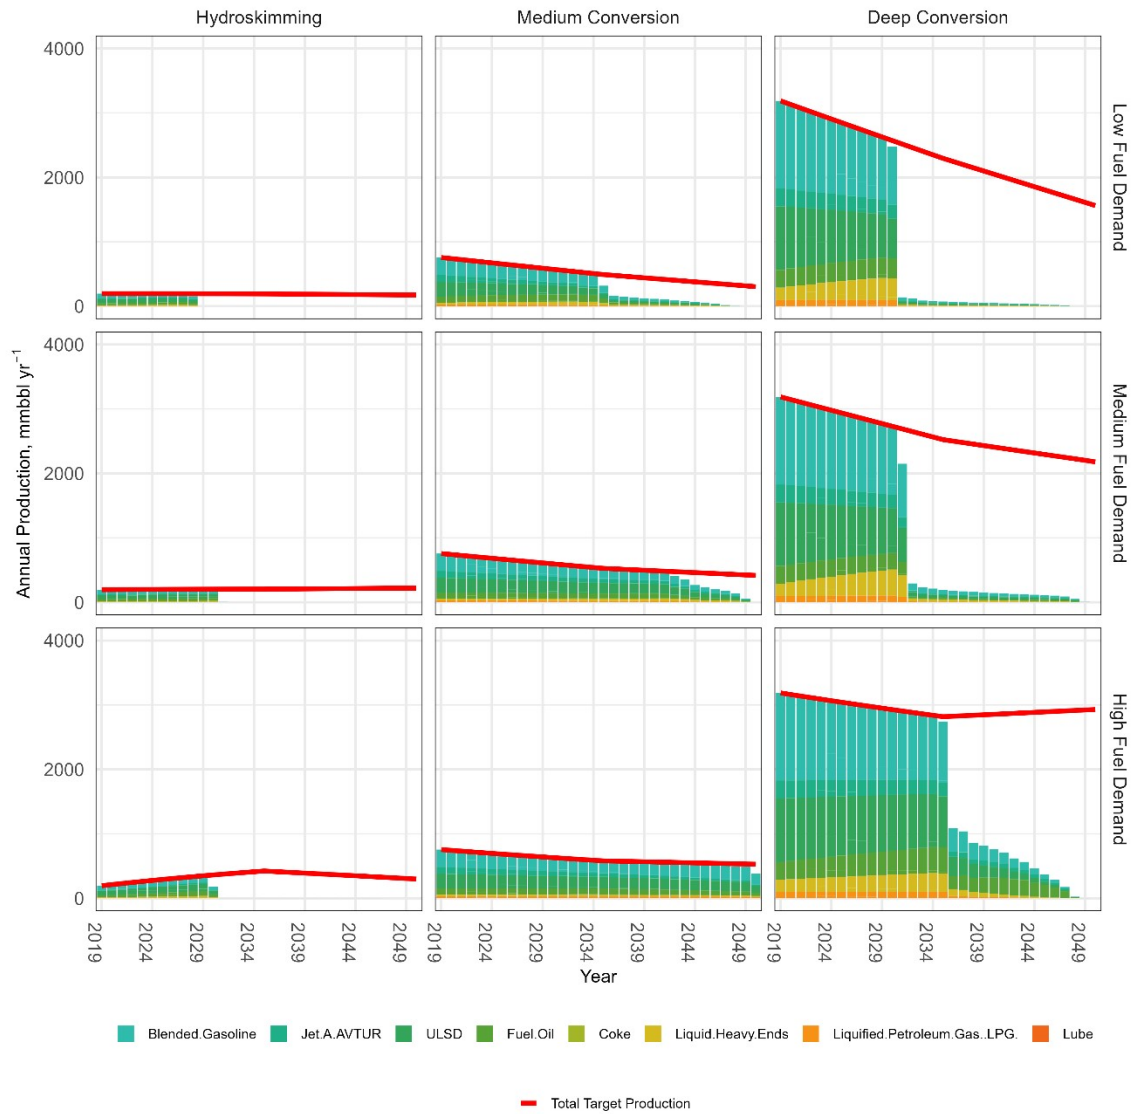

1046  
 1047 Figure S22. Expected U.S Refinery Production by Selected Refinery Configurations based on Likelihoods of  
 1048 Different Options.  
 1049

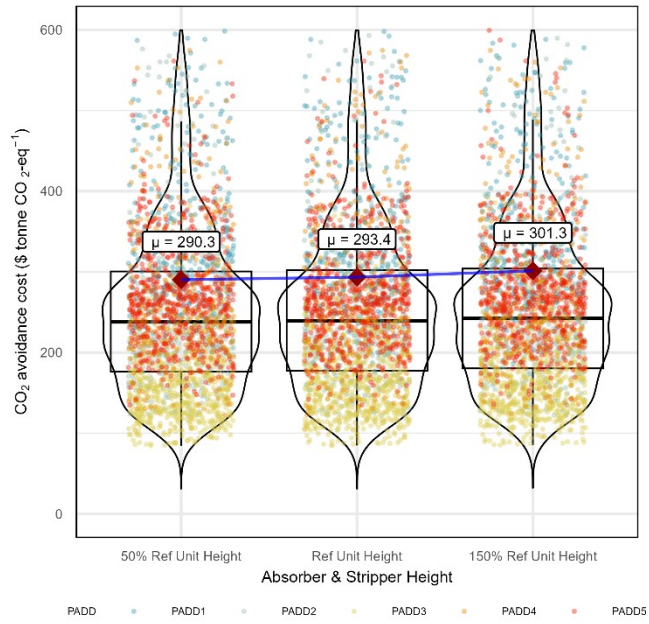

1050

1051 Figure S23. Sensitivity of CO<sub>2</sub> Avoidance Costs to Variations in Absorber and Stripper Heights (50%, 100%,  
 1052 and 150% of the Reference Case Dimensions)

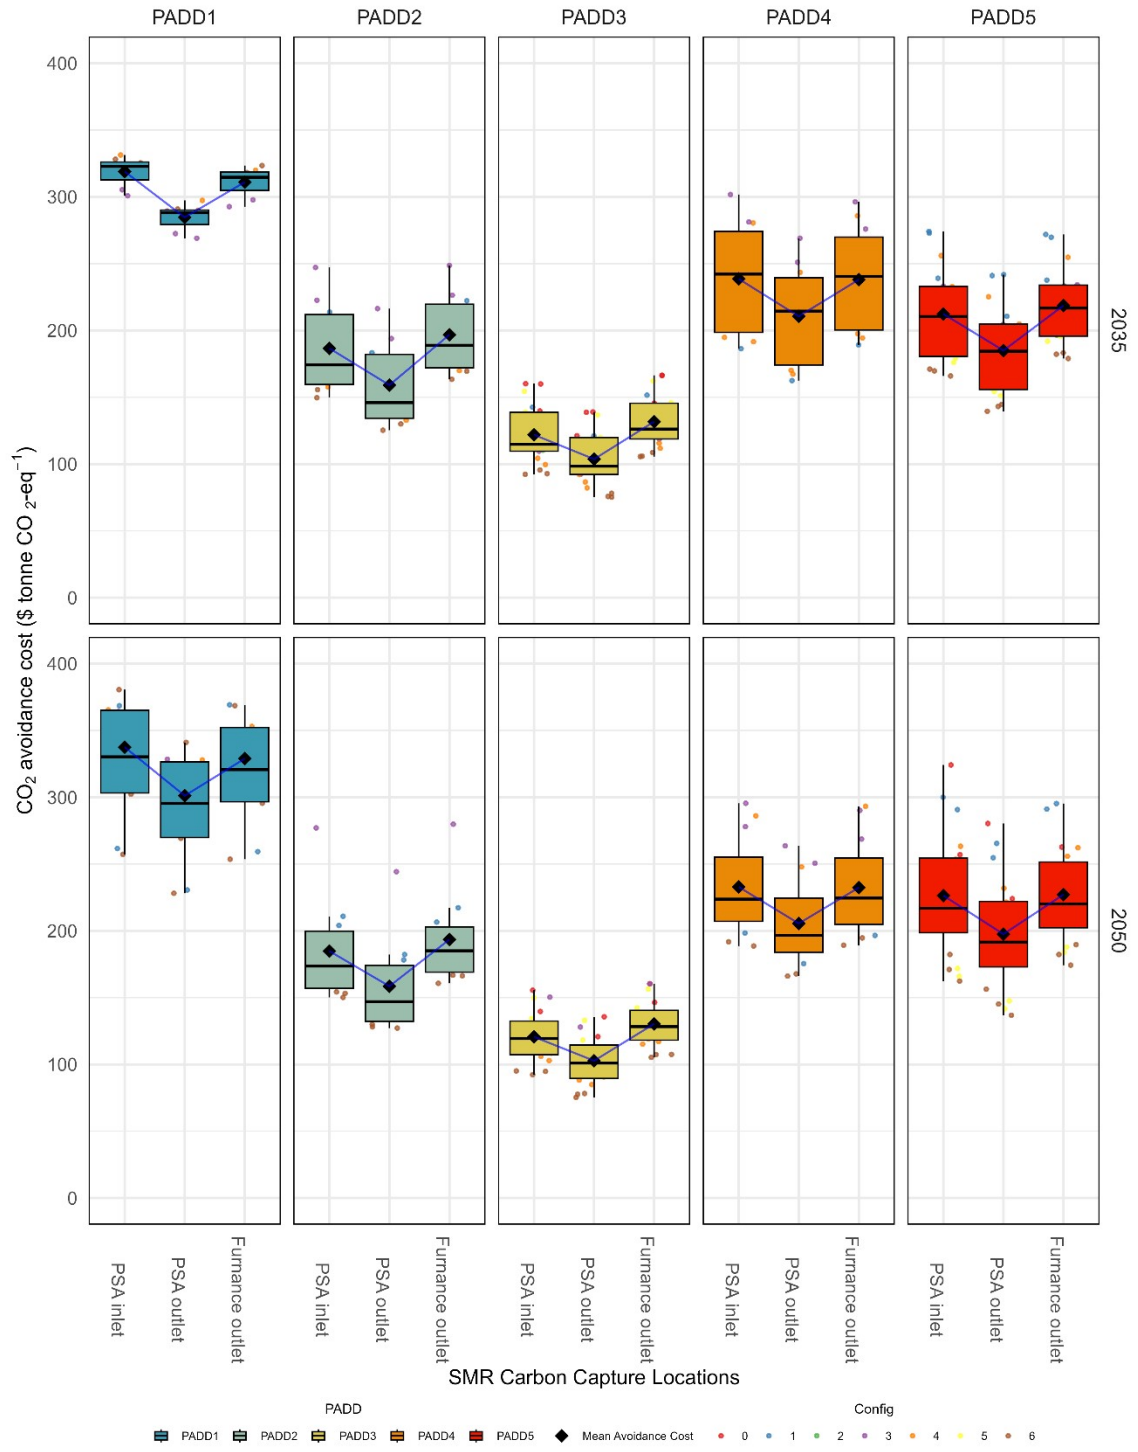

1053  
1054  
1055  
1056

Figure S24. Distribution of CO<sub>2</sub> Avoidance Cost for Carbon Capture on Different SMR Streams for U.S. Refineries.

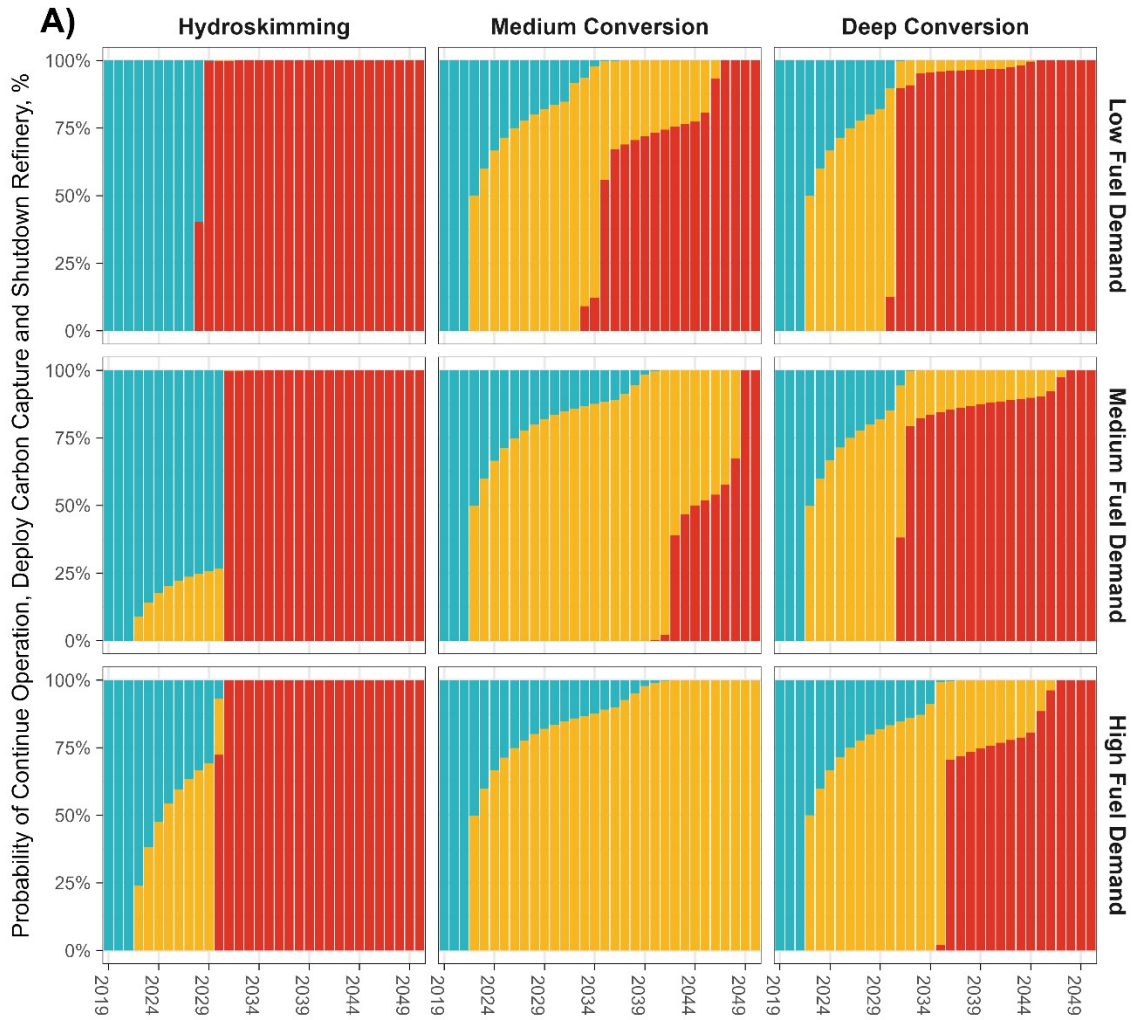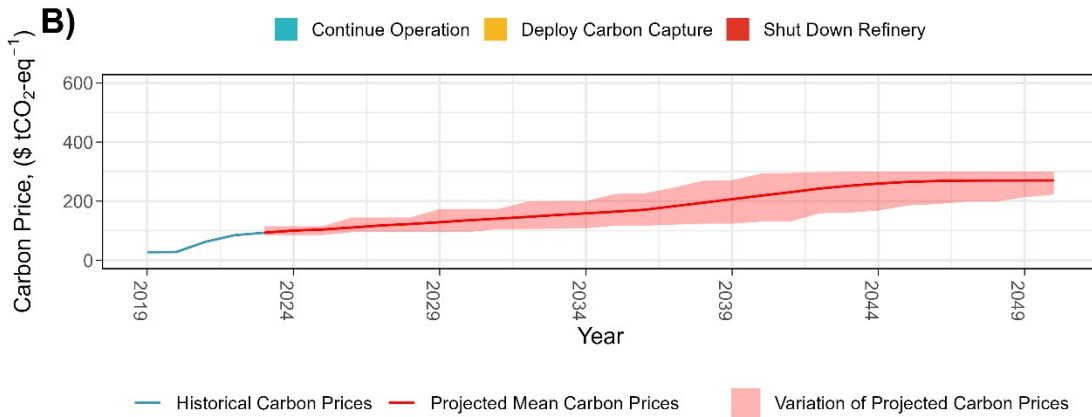

1057  
1058  
1059  
1060

Figure S25. Likelihood of Three Choices Using Real Options Analysis for Three Refinery Types under Three Transportation Fuel Demand Scenarios for Anticipated Carbon Price Scenario.

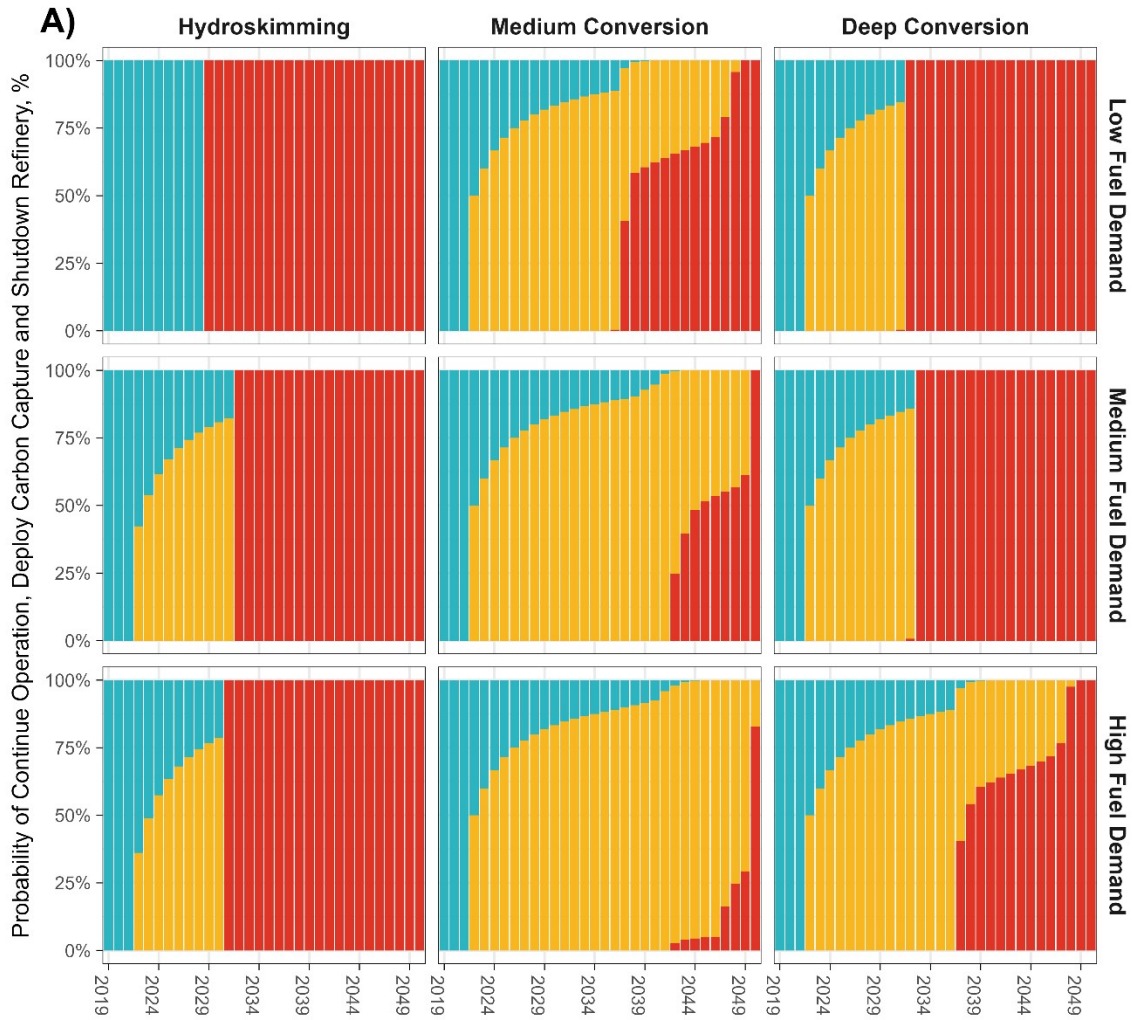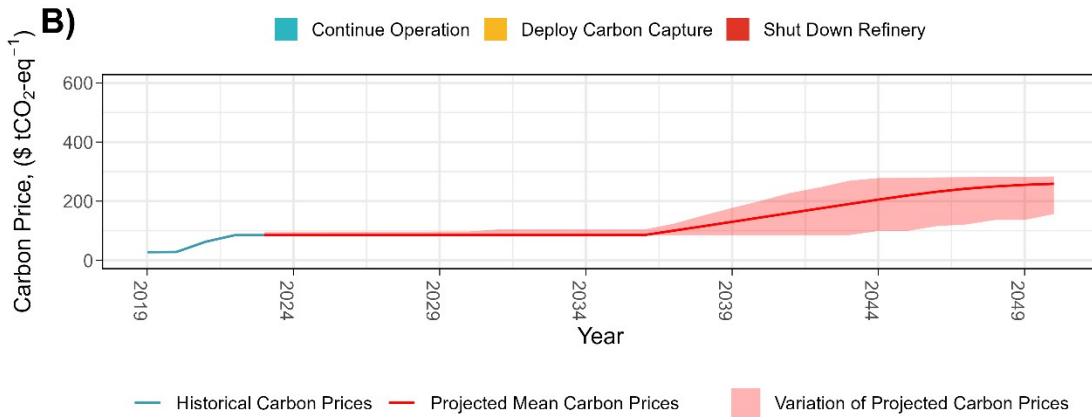

1061  
1062  
1063  
1064

Figure S26. Likelihood of Three Choices Using Real Options Analysis for Three Refinery Types under Three Transportation Fuel Demand Scenarios for Deferred Carbon Price Scenario.

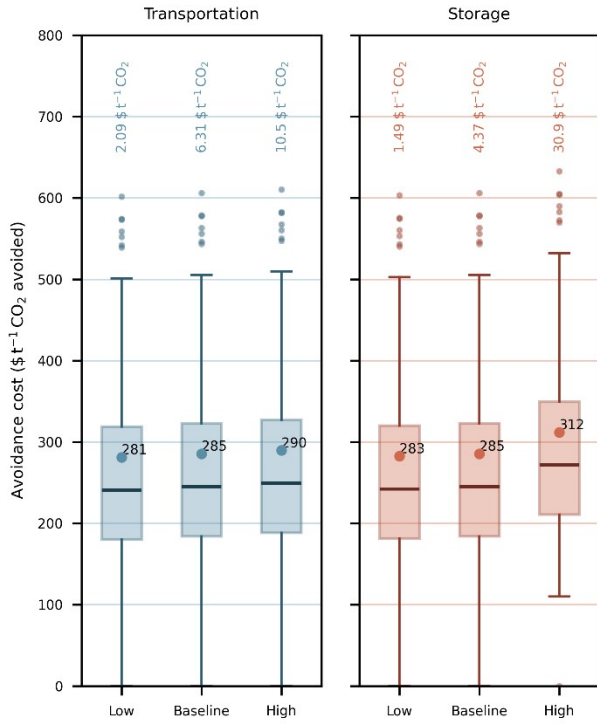

1065  
 1066 Figure S27. Sensitivity of CO<sub>2</sub> avoidance cost to transport and storage cost variations  
 1067

1068 **Tables**

1069

1070 Table S1. PRELIM Specified Refinery Configurations

| Refinery Configuration             | Configuration # |
|------------------------------------|-----------------|
| Hydroskimming Configuration (0)    | 0               |
| Medium Conversion: FCC (1)         | 1               |
| Medium Conversion: GO-HC (2)       | 2               |
| Medium Conversion: FCC & GO-HC (3) | 3               |
| Deep Conversion: FCC (4)           | 4               |
| Deep Conversion: GO-HC (5)         | 5               |
| Deep Conversion: FCC & GO-HC (6)   | 6               |

1071

1072 Table S2. EIA (13) Reported Historical Contribution of Fuel to Demand.

|   |                                                                                                                                            |
|---|--------------------------------------------------------------------------------------------------------------------------------------------|
| 1 | The gasoline consumed in the transportation sector consists of 96 %volume of total gasoline supplied.                                      |
| 2 | The jet fuel consumed in the transportation sector consists of 100 %volume of total jet fuel supplied.                                     |
| 3 | The diesel consumed in the transportation sector consists of 77 %volume of total diesel supplied.                                          |
| 4 | The heating oil consumed in the transportation sector consists of 23 %volume of total diesel supplied.                                     |
| 5 | The residual fuel oil consumed in the transportation sector consists of 80%volume of total residual fuel oil supplied                      |
| 6 | The refinery-produced coke usually takes 1.4%volume of the total supplied refinery products, while the residual fuel oil takes about 1.2%. |

1073

1074 Table S3. The proportion of locally produced transportation fuel to total fuel supplies

| PADD | Gasoline | ULSD | Jet Fuel | Fuel Oil | Coke | LHE  | LPG  | Lube |
|------|----------|------|----------|----------|------|------|------|------|
| 1    | 35%      | 27%  | 27%      | 42%      | 131% | 0%   | 107% | 46%  |
| 2    | 89%      | 91%  | 94%      | 16%      | 121% | 100% | 192% | 53%  |
| 3    | 279%     | 325% | 453%     | 1004%    | 462% | 100% | 112% | 181% |

|   |      |      |     |      |      |     |      |      |
|---|------|------|-----|------|------|-----|------|------|
| 4 | 103% | 101% | 59% | 107% | 157% | 57% | 715% | 0%   |
| 5 | 91%  | 107% | 90% | 247% | 493% | 43% | 64%  | 226% |

1075

1076 Table S4. Target Crude Input Qualities for Each PADD

| PADD          | 1     |       | 2     |       | 3     |       | 4     |       | 5     |       |
|---------------|-------|-------|-------|-------|-------|-------|-------|-------|-------|-------|
| Sulfur & Year | Sour  | Sweet |
| 2035          | 1.88  | 0.34  | 2.82  | 0.73  | 2.18  | 0.95  | 2.89  | 1.00  | 1.70  | 1.41  |
| 2050          | 2.46  | 0.21  | 6.33  | 0.35  | 3.09  | 0.93  | 4.56  | 0.97  | 1.91  | 1.55  |
| API & Year    | Heavy | Light |
| 2035          | 29.3  | 37.6  | 29.6  | 35.7  | 29.3  | 37.6  | 28.6  | 34.8  | 28.3  | 32.5  |
| 2050          | 26.9  | 38.7  | 27.3  | 36.2  | 26.9  | 38.7  | 25.9  | 34.7  | 29.1  | 35.0  |

1077

1078 Table S5. SRCI for Individual Refinery Configuration

| Refinery Configuration | SRCI for Individual Refinery Configuration |
|------------------------|--------------------------------------------|
| 0                      | 3.13                                       |
| 1                      | 7.92                                       |
| 2                      | 6.14                                       |
| 3                      | 9.70                                       |
| 4                      | 10.3                                       |
| 5                      | 9.42                                       |
| 6                      | 10.6                                       |

1079

1080 Table S6. Constants and Coefficients for the Multi-linear Regression Model

| PADD <i>n</i> | Intercept Coefficient | API Coefficient | Gasoline Coefficient | Diesel Coefficient | Jet Fuel Coefficient |
|---------------|-----------------------|-----------------|----------------------|--------------------|----------------------|
|---------------|-----------------------|-----------------|----------------------|--------------------|----------------------|

|   |        |       |       |       |       |
|---|--------|-------|-------|-------|-------|
| 1 | 9.26   | 0.03  | -0.38 | -7.91 | -2.63 |
| 2 | -45.97 | -0.07 | 61.63 | 72.54 | 56.23 |
| 3 | 2.36   | -0.09 | 10.41 | 14.57 | 11.01 |
| 4 | -24.13 | 0.04  | 22.29 | 48.84 | 40.37 |
| 5 | -6.86  | 0.24  | 9.81  | 10.91 | 20.88 |

1081

1082 Table S7. Assumed Key Performance Indicator (KPI) for CapEx

| Item                                                              | KPI  | Unit  |
|-------------------------------------------------------------------|------|-------|
| Discount Rate                                                     | 8    | %     |
| Project Lifetime                                                  | 25   | Years |
| Construction Periods                                              | 3    | Years |
| Project Contingency                                               | 15   | %     |
| Ratio of Construction Cost to Absorber Equipment Cost             | 58.7 | %     |
| Ratio of EPC Cost to Absorber Equipment Cost                      | 40.5 | %     |
| Ratio of Construction Cost to Stripper Equipment Cost             | 58.8 | %     |
| Ratio of EPC Cost to Stripper Equipment Cost                      | 40.6 | %     |
| Ratio of Construction Cost to Compressor Equipment Cost           | 76.2 | %     |
| Ratio of EPC Cost to Compressor Equipment Cost                    | 46.8 | %     |
| Ratio of Construction Cost to Interconnection Equipment Cost      | 115  | %     |
| Ratio of EPC Cost to Interconnection Equipment Cost               | 45.7 | %     |
| Ratio of Construction Cost to Cooling Tower Equipment Cost        | 72.1 | %     |
| Ratio of EPC Cost to Cooling Tower Equipment Cost                 | 45.0 | %     |
| Ratio of Construction Cost to Wastewater Treatment Equipment Cost | 58.8 | %     |
| Ratio of EPC Cost to Wastewater Treatment Equipment Cost          | 40.1 | %     |
| Ratio of Other Cost to CapEx                                      | 10.0 | %     |

1083

1084 Table S8. Assumed KPI for OpEx

| Item                              | KPI   | Unit                     |
|-----------------------------------|-------|--------------------------|
| Operating Hours                   | 8,500 | hours/y                  |
| MEA                               | 2,000 | \$/ton MEA               |
| MEA Sludge Disposal Cost          | 225   | \$/ton MEA               |
| Natural Gas                       | 4.99  | USD/MMBtu                |
| Electrical Energy Cost            | 0.07  | per kWh                  |
| Calcium Carbonate Cost            | 44.0  | \$/ton CaCO <sub>3</sub> |
| Molecular Sieve Adsorbent Cost    | 7,200 | \$/ton Adsorbent         |
| Raw Process Water Make-up Cost    | 0.10  | \$/ton Water             |
| Waste treatment Cost              | 5.00% | of TPC                   |
| Miscellaneous Operating Materials | 2.00% | of VOC                   |
| Local Tax                         | 1.60% | of TPC                   |

|                                                                               |        |                       |
|-------------------------------------------------------------------------------|--------|-----------------------|
| Insurance                                                                     | 1.00%  | of TPC                |
| Material Maintenance (MM)                                                     | 6.00%  | of TPC                |
| Share Annual Material Maintenance Cost in the Overall Annual Maintenance Cost | 60.0%  | of M                  |
| Total Number of Employee                                                      | 0.09   | ppl/t CO <sub>2</sub> |
| Average Annual Salary                                                         | 80,000 | USD/y                 |
| Operating Labor (OL)                                                          | 5308   | per Hour              |
| Laboratory costs                                                              | 20.0%  | of OL                 |
| Supervision                                                                   | 20.0%  | of OL                 |
| Plant Overheads                                                               | 80.0%  | of OL                 |
| Operating Supplies                                                            | 15.0%  | of M                  |
| Administrative Cost                                                           | 15.0%  | of OL                 |
| Distribution and Marketing                                                    | 0.50%  | of TOC                |
| R&D cost                                                                      | 5.00%  | of TOC                |

1085

1086 Table S9. Crude Input and Product Yields for Selected Individual Refineries in 2019, 2035 and 2050

| Fuel Demand | Year | Config. | Total Cap. US (mil bbl/d) | Avg Cap. (MMbbl/d) | Total Prod. (MMbbl/d) | Gas Yield (%) | Jet Yield (%) | Diesel Yield (%) | Fuel Oil Yield (%) |
|-------------|------|---------|---------------------------|--------------------|-----------------------|---------------|---------------|------------------|--------------------|
| Low         | 2019 | 0       | 507                       | 28,450             | 28,776                | 34            | 5             | 30               | 14                 |
| Low         | 2035 | 0       | 574                       | 28,450             | 28,776                | 22            | 4             | 25               | 23                 |
| Low         | 2050 | 0       | 525                       | 28,450             | 28,776                | 23            | 3             | 25               | 22                 |
| Low         | 2019 | 3       | 1,847                     | 158,147            | 158,291               | 34            | 14            | 29               | 12                 |
| Low         | 2035 | 3       | 1,299                     | 111,225            | 111,326               | 31            | 10            | 28               | 16                 |
| Low         | 2050 | 3       | 808                       | 69,184             | 69,247                | 43            | 4             | 27               | 11                 |
| Low         | 2019 | 6       | 7,614                     | 288,262            | 282,040               | 42            | 8             | 30               | 8                  |
| Low         | 2035 | 6       | 6,131                     | 232,116            | 227,106               | 34            | 7             | 28               | 14                 |
| Low         | 2050 | 6       | 4,228                     | 160,070            | 156,615               | 8             | 14            | 5                | 70                 |
| Medium      | 2019 | 0       | 507                       | 28,450             | 28,776                | 34            | 5             | 30               | 14                 |
| Medium      | 2035 | 0       | 619                       | 28,450             | 28,776                | 25            | 6             | 23               | 21                 |
| Medium      | 2050 | 0       | 703                       | 28,450             | 28,776                | 16            | 10            | 13               | 28                 |
| Medium      | 2019 | 3       | 1,847                     | 158,147            | 158,291               | 34            | 14            | 29               | 12                 |
| Medium      | 2035 | 3       | 1,407                     | 120,473            | 120,582               | 31            | 11            | 30               | 15                 |
| Medium      | 2050 | 3       | 1,112                     | 95,214             | 95,300                | 25            | 11            | 30               | 14                 |
| Medium      | 2019 | 6       | 7,614                     | 288,262            | 282,040               | 42            | 8             | 30               | 8                  |
| Medium      | 2035 | 6       | 6,638                     | 251,311            | 245,887               | 37            | 7             | 22               | 10                 |

|        |      |   |       |         |         |    |    |    |    |
|--------|------|---|-------|---------|---------|----|----|----|----|
| Medium | 2050 | 6 | 5,850 | 221,478 | 216,697 | 26 | 11 | 30 | 19 |
| High   | 2019 | 0 | 507   | 28,450  | 28,776  | 34 | 5  | 30 | 14 |
| High   | 2035 | 0 | 719   | 28,450  | 28,776  | 18 | 7  | 24 | 23 |
| High   | 2050 | 0 | 910   | 28,450  | 28,776  | 14 | 10 | 24 | 25 |
| High   | 2019 | 3 | 1,847 | 158,147 | 158,291 | 34 | 14 | 29 | 12 |
| High   | 2035 | 3 | 1,646 | 140,937 | 141,065 | 34 | 6  | 21 | 22 |
| High   | 2050 | 3 | 1,444 | 123,641 | 123,753 | 17 | 11 | 28 | 19 |
| High   | 2019 | 6 | 7,614 | 288,262 | 282,040 | 42 | 8  | 30 | 8  |
| High   | 2035 | 6 | 7,744 | 288,262 | 282,040 | 32 | 8  | 22 | 14 |
| High   | 2050 | 6 | 7,837 | 288,262 | 282,040 | 21 | 14 | 31 | 15 |

1087

1088

1089

1090

Table S10. Description of Different Fuel Demand Scenarios and the Corresponding Electrification Scenarios Taking from EFS

| Fuel Demand Scenario    | Electrification Scenario | Year        | Scenario Name | Description of Changing in Vehicle Fleet                                                                                                                                    |
|-------------------------|--------------------------|-------------|---------------|-----------------------------------------------------------------------------------------------------------------------------------------------------------------------------|
| Baseline (BL)           | Baseline                 | 2019        | BL            | 2019 vehicle fleet profile                                                                                                                                                  |
| Low Fuel Demand (LD)    | High Electrification     | 2035 & 2050 | LD35/LD50     | PEV (Plug-in Electric Vehicle) sales shares from AEO2017 reference case; PEV adoption is largely restricted to LDVs (Light Duty Vehicles)                                   |
| Medium Fuel Demand (MD) | Medium Electrification   | 2035 & 2050 | MD35/MD50     | Growing PEV adoption for LDVs; MDVs (Medium Duty Vehicles), HDVs (Heavy Duty Vehicles) and passenger bus electrification are primarily limited to short distance uses only. |
| High Fuel Demand (HD)   | Low Electrification      | 2035 & 2050 | HD35/HD50     | High PEV adoption in LDVs and passenger buses; PEVs adoption for MDVs and HDVs expands to both short and long distance uses.                                                |

1091

1092

1093

Table S11. Changes in Refinery Product Production and Supply by PADD Region (HD35 to HD50 Scenario)

| PADD | Scenario  | Product  | Delta_Production | Delta_Demand | Surplus/Deficit | Contribution |
|------|-----------|----------|------------------|--------------|-----------------|--------------|
| 1    | HD35-HD50 | Gasoline | -27.4            | -78.8        | 51.4            | 0.515        |
| 3    | HD35-HD50 | ULSD     | 52.9             | 16.2         | 36.6            | 0.367        |
| 3    | HD35-HD50 | Fuel Oil | 37.5             | 3.74         | 33.8            | 0.338        |
| 5    | HD35-HD50 | Coke     | 24.1             | 4.88         | 19.2            | 0.192        |
| 3    | HD35-HD50 | Coke     | 15.4             | 3.34         | 12.1            | 0.121        |
| 2    | HD35-HD50 | LPG      | 24.7             | 12.9         | 11.9            | 0.119        |

|   |           |          |        |        |         |          |
|---|-----------|----------|--------|--------|---------|----------|
| 4 | HD35-HD50 | LPG      | 12.5   | 1.75   | 10.8    | 0.108    |
| 2 | HD35-HD50 | Gasoline | -54.7  | -61.2  | 6.52    | 0.0652   |
| 5 | HD35-HD50 | Fuel Oil | 10.7   | 4.37   | 6.37    | 0.0638   |
| 5 | HD35-HD50 | Gasoline | -34.6  | -38    | 3.43    | 0.0344   |
| 1 | HD35-HD50 | Jet      | -0.906 | -3.4   | 2.49    | 0.0249   |
| 1 | HD35-HD50 | Coke     | 8.66   | 6.64   | 2.03    | 0.0203   |
| 5 | HD35-HD50 | ULSD     | 20.5   | 19     | 1.44    | 0.0144   |
| 3 | HD35-HD50 | LPG      | 8.39   | 7.5    | 0.894   | 0.00895  |
| 5 | HD35-HD50 | Jet      | -7.3   | -8.14  | 0.831   | 0.00832  |
| 1 | HD35-HD50 | LPG      | 11.8   | 11     | 0.736   | 0.00737  |
| 2 | HD35-HD50 | Coke     | 2.89   | 2.39   | 0.497   | 0.00497  |
| 4 | HD35-HD50 | Jet      | -0.359 | -0.609 | 0.249   | 0.0025   |
| 4 | HD35-HD50 | Coke     | 0.326  | 0.207  | 0.119   | 0.00119  |
| 5 | HD35-HD50 | Lube     | 0.175  | 0.0771 | 0.0975  | 0.000976 |
| 2 | HD35-HD50 | Jet      | -1.08  | -1.15  | 0.0688  | 0.000689 |
| 4 | HD35-HD50 | Fuel Oil | 0.798  | 0.754  | 0.0441  | 0.000442 |
| 3 | HD35-HD50 | Lube     | 0.088  | 0.0484 | 0.0396  | 0.000396 |
| 4 | HD35-HD50 | ULSD     | 3.3    | 3.28   | 0.0255  | 0.000255 |
| 2 | HD35-HD50 | LHE      | 2.05   | 2.05   | 0       | 0        |
| 3 | HD35-HD50 | LHE      | 2.86   | 2.86   | 0       | 0        |
| 4 | HD35-HD50 | Lube     | 0      | 0.0142 | -0.0142 | -0.00014 |
| 4 | HD35-HD50 | LHE      | 0.152  | 0.178  | -0.0254 | -0.00025 |
| 2 | HD35-HD50 | Lube     | 0.0621 | 0.118  | -0.056  | -0.00056 |
| 1 | HD35-HD50 | Lube     | 0.0709 | 0.154  | -0.0828 | -0.00083 |
| 4 | HD35-HD50 | Gasoline | -7.02  | -6.81  | -0.212  | -0.00213 |
| 2 | HD35-HD50 | ULSD     | 23.7   | 26.1   | -2.39   | -0.0239  |
| 5 | HD35-HD50 | LHE      | 1.79   | 4.19   | -2.39   | -0.024   |
| 5 | HD35-HD50 | LPG      | 4.77   | 7.5    | -2.73   | -0.0273  |
| 1 | HD35-HD50 | Fuel Oil | 3.11   | 7.43   | -4.31   | -0.0432  |
| 2 | HD35-HD50 | Fuel Oil | 1.46   | 5.99   | -4.54   | -0.0454  |
| 1 | HD35-HD50 | LHE      | 0      | 5.69   | -5.69   | -0.0569  |
| 3 | HD35-HD50 | Jet      | -17    | -3.75  | -13.2   | -0.133   |
| 1 | HD35-HD50 | ULSD     | 8.84   | 32.3   | -23.5   | -0.235   |
| 3 | HD35-HD50 | Gasoline | -66.3  | -23.7  | -42.6   | -0.426   |

1094  
1095  
1096  
1097

Table S12. PRELIM Estimated Volume-weighted Average Emissions Intensities of Different Process Unit in U.S. Refineries

| Process Unit | Emissions Intensity, kgCO <sub>2</sub> eq per bbl of crude fraction, |
|--------------|----------------------------------------------------------------------|
| AT           | 7.61                                                                 |
| VDU          | 4.75                                                                 |
| NHT          | 17.9                                                                 |

|       |      |
|-------|------|
| KHT   | 24.6 |
| GOHC  | 44.7 |
| DHT   | 31.8 |
| CHT   | 15.7 |
| COKER | 15.3 |
| FCC   | 31.6 |
| CNR   | 14.5 |
| ISO   | 34   |
| RHT   | 35.6 |

1098

1099 Table S13. Estimated U.S. GHG Emissions with or without Carbon Capture under Different Fuel Demand

1100 Scenarios

| Crude Quality | Demand, MMbbl/year | GHG, No CC, MMt/y | GHG, No CC for FCC Refineries, MMt/y | GHG, Max CC, MMt/y | GHG, Min CC, MMt/y |
|---------------|--------------------|-------------------|--------------------------------------|--------------------|--------------------|
| REF/REF       | 5540               | 212               | 198                                  | 86.9               | 202                |
| HEAVY/SOUR    | 4710               | 208               | 185                                  | 87.6               | 198                |
| HEAVY/SOUR    | 4580               | 211               | 190                                  | 88.5               | 200                |
| HEAVY/SOUR    | 3740               | 174               | 155                                  | 73.2               | 165                |
| HEAVY/SOUR    | 3040               | 154               | 137                                  | 65.7               | 147                |
| HEAVY/SOUR    | 3470               | 158               | 139                                  | 67                 | 151                |
| HEAVY/SOUR    | 2100               | 111               | 98.5                                 | 47.6               | 106                |
| REF/REF       | 5540               | 212               | 198                                  | 86.9               | 202                |
| LIGHT/SWEET   | 4710               | 198               | 171                                  | 83.5               | 189                |
| LIGHT/SWEET   | 4580               | 204               | 177                                  | 85.8               | 195                |
| LIGHT/SWEET   | 3740               | 168               | 147                                  | 70.8               | 160                |
| LIGHT/SWEET   | 3040               | 151               | 129                                  | 64.3               | 145                |
| LIGHT/SWEET   | 3470               | 152               | 132                                  | 64.9               | 147                |
| LIGHT/SWEET   | 2100               | 105               | 88.8                                 | 44.8               | 101                |

1101

1102

1103 Table S14. Post-Combustion Capture Unit's Specific Reboiler Duties and Electricity Consumptions for  
 1104 Various Gas Flows in Carbon Capture Module

|                                         | Assumed CO <sub>2</sub> Content (mol%) | Specific Reboiler Duty (MJ Steam/kg CO <sub>2</sub> captured) | Specific Electricity Consumption (MJ/kg CO <sub>2</sub> captured) |
|-----------------------------------------|----------------------------------------|---------------------------------------------------------------|-------------------------------------------------------------------|
| Natural gas combusted flue gas          | 8.74%                                  | 4.13                                                          | 0.32                                                              |
| Refinery fuel gas combusted flue gas    | 6~11.0%                                | 4.12                                                          | 0.17                                                              |
| Internal Liquid fuel combusted flue gas | 10~12.5%                               | 3.00                                                          | 0.15                                                              |
| PSA tail gas combusted flue gas         | 8.94%                                  | 4.13                                                          | 0.19                                                              |
| PSA tail gas                            | 19.28%                                 | 2.00                                                          | 0.11                                                              |
| FCC coke combusted flue gas             | 16.85%                                 | 3.00                                                          | 0.12                                                              |

1105

1106 Table S15. Location Factor for Each PADD

| PADD | Location Factor |
|------|-----------------|
| 1    | 1.4             |
| 2    | 1.4             |
| 3    | 1.0             |
| 4    | 1.2             |
| 5    | 1.7             |

1107

1108 Table S16. Variables Considered for Real Option Analysis

| Variable                | High                   | Reference          | Low                    |
|-------------------------|------------------------|--------------------|------------------------|
| Risk-free interest rate | 7%                     | 3%                 | 1%                     |
| Crack Spread            | AEO (39) Low Oil Price | AEO (39) Reference | AEO(39) High Oil Price |
| CCS Utility Cost        | 150%                   | 100%               | 50%                    |
| Carbon Price            | 150%                   | 100%               | 50%                    |
| CCS CapEx               | 150%                   | 100%               | 50%                    |

1109

1110 Table S17. List of Captured Individual and Combination of Process Units

| Index | Carbon Capture Scenarios |
|-------|--------------------------|
| 1     | No Carbon Capture        |
| 2     | ADU/VDU                  |

Comment [FL]: STM: Why utility cost and not capital cost?

Comment [FL]: Added a new parameter for CapEx

|    |                                                                    |
|----|--------------------------------------------------------------------|
| 3  | CNR                                                                |
| 4  | FCC/RFCC                                                           |
| 5  | Coker                                                              |
| 6  | Hydrotreaters                                                      |
| 7  | Steam Boiler                                                       |
| 8  | SMR                                                                |
| 9  | Others                                                             |
| 10 | ADU/VDU+CNR                                                        |
| 11 | ADU/VDU+FCC/RFCC                                                   |
| 12 | ADU/VDU+SMR                                                        |
| 13 | CNR+FCC/RFCC                                                       |
| 14 | CNR+SMR                                                            |
| 15 | FCC/RFCC+SMR                                                       |
| 16 | ADU/VDU+CNR+FCC/RFCC                                               |
| 17 | ADU/VDU+CNR+SMR                                                    |
| 18 | ADU/VDU+FCC/RFCC+SMR                                               |
| 19 | CNR+FCC/RFCC+SMR                                                   |
| 20 | ADU/VDU+CNR+FCC/RFCC+SMR                                           |
| 21 | ADU/VDU+CNR+FCC/RFCC+Coker+Hydrotreater+SMR                        |
| 22 | ADU/VDU+CNR+FCC/RFCC+Coker+Hydrotreater+SMR+Others                 |
| 23 | ADU/VDU+CNR+Steam Boiler                                           |
| 24 | ADU/VDU+FCC/RFCC+Steam Boiler                                      |
| 25 | ADU/VDU+SMR+Steam Boiler                                           |
| 26 | CNR+FCC/RFCC+Steam Boiler                                          |
| 27 | CNR+SMR+Steam Boiler                                               |
| 28 | FCC/RFCC+SMR+Steam Boiler                                          |
| 29 | ADU/VDU+CNR+FCC/RFCC+Steam Boiler                                  |
| 30 | ADU/VDU+CNR+SMR+Steam Boiler                                       |
| 31 | ADU/VDU+FCC/RFCC+SMR+Steam Boiler                                  |
| 32 | CNR+FCC/RFCC+SMR+Steam Boiler                                      |
| 33 | ADU/VDU+CNR+FCC/RFCC+SMR+Steam Boiler                              |
| 34 | ADU/VDU+CNR+FCC/RFCC+Coker+Hydrotreater+Steam<br>Boiler+SMR        |
| 35 | ADU/VDU+CNR+FCC/RFCC+Coker+Hydrotreater+Steam<br>Boiler+SMR+Others |

1111  
1112  
1113

1114 Table S18. CO<sub>2</sub> Compression Unit Utility Consumption Estimation

| CO <sub>2</sub> Product            | Stage 1 | Stage 2 | Stage 3 | Stage 4 | Stage 5 | Stage 6 |
|------------------------------------|---------|---------|---------|---------|---------|---------|
| Ps, psia                           | 23.5    | 52.0    | 113     | 248     | 545     | 1,200   |
| Pd, psia                           | 53.7    | 116     | 253     | 550     | 1,210   | 2,220   |
| Ts, K                              | 294     | 294     | 294     | 294     | 294     | 294     |
| Td, K                              | 361     | 359     | 361     | 362     | 365     | 347     |
| Zs                                 | 1.00    | 0.98    | 0.98    | 0.95    | 0.90    | 0.80    |
| Zd                                 | 0.98    | 0.98    | 0.95    | 0.90    | 0.80    | 0.59    |
| n/n-1                              | 0.23    | 0.25    | 0.22    | 0.18    | 0.10    | -0.14   |
| Polytropic compression head, kJ/kg | 58.1    | 55.5    | 55.1    | 52.4    | 47.9    | 29.7    |

1115

1116 Table S19. SCF for Individual Process Units (21)

| Process Unit | SCF | Process Unit  | SCF |
|--------------|-----|---------------|-----|
| AT           | 1   | Coke          | 0   |
| VT           | 2   | Sulfur        | 0   |
| Coker        | 6   | Asphalt       | 2   |
| Visbreaker   | 3   | POLY          | 10  |
| FCC          | 6   | Aromatics     | 15  |
| Reformer     | 5   | Isomerization | 15  |
| Hydrocracker | 6   | Lube          | 10  |
| Hydrotreater | 2   | Oxygenates    | 10  |
| Alkylation   | 10  | Hydrogen      | 1   |

1117

1118 Table S20. Regression Coefficient for the Linear Regression Model between Regional Refinery Output and  
1119 Input.

| PADD n | Coefficient b <sub>n</sub> |
|--------|----------------------------|
| 1      | 0.345                      |
| 2      | 0.899                      |
| 3      | 1.12                       |
| 4      | 1.01                       |
| 5      | 0.845                      |

1120

1121 Table S21. Mean refinery crude input historical change for different refinery configurations

| configuratio<br>n | 15-year max<br>( $\Delta p_{i,n}^{ub}$ ) | 15-year min<br>( $\Delta p_{i,n}^{lb}$ ) | 30-year max<br>( $2 \times \Delta p_{i,n}^{ub}$ ) | 30-year min<br>( $2 \times \Delta p_{i,n}^{lb}$ ) |
|-------------------|------------------------------------------|------------------------------------------|---------------------------------------------------|---------------------------------------------------|
| 0                 | 1.77                                     | -0.387                                   | 3.53                                              | -0.774                                            |
| 1                 | 0.348                                    | -0.0162                                  | 0.696                                             | -0.0324                                           |
| 2                 | 0.0339                                   | -0.454                                   | 0.0678                                            | -0.909                                            |
| 3                 | 0.915                                    | -0.443                                   | 1.83                                              | -0.886                                            |

|   |        |        |        |        |
|---|--------|--------|--------|--------|
| 4 | 0.242  | -0.127 | 0.483  | -0.254 |
| 5 | 0.411  | -0.521 | 0.823  | -1     |
| 6 | 0.0394 | -0.324 | 0.0788 | -0.648 |

1122

1123 Table S22. Background Information on the Reference Carbon Capture Configuration

| Item                     | KPI     | Unit   |
|--------------------------|---------|--------|
| Refinery Configuration   | 6       | -      |
| Refinery Capacity        | 350,000 | bbbl/d |
| Flue Gas Flowrate        | 286     | t/h    |
| CO <sub>2</sub> Flowrate | 49.2    | t/h    |
| CO <sub>2</sub> vol%     | 11.3    | %      |

1124

1125 Table S23. Equipment List for Reference Carbon Capture Configuration (2)

| Section    | Letter | Description              | Type        | Size Metric | Type of Size Metric | Unit for Size Metric | Design Pressure (barg) | Material | Equipment Cost (k\$) |
|------------|--------|--------------------------|-------------|-------------|---------------------|----------------------|------------------------|----------|----------------------|
| Absorption | T      | Flue Gas Desulfurization | Vertical    | 33,094      | Shell Mass          | kg                   | 1.9                    | SS 304L  | 2,084                |
| Absorption | C      | Exhaust Fan              | Blower      | 179,009     | Flow                | m <sup>3</sup> /h    | 19                     | SS 304L  | 1,146                |
| Absorption | C      | Exhaust Fan After FGD    | Blower      | 219,483     | Flow                | m <sup>3</sup> /h    | 20                     | SS 304L  | 1,404                |
| Absorption | E      | Flue Gas Reheater        | P&F         | 653         | Area                | m <sup>2</sup>       | 2                      | SS 304L  | 37                   |
| Absorption | E      | DCC Cooler               | P&F         | 2,056       | Area                | m <sup>2</sup>       | 2                      | SS 304L  | 106                  |
| Absorption | E      | Amine Wash Cooler        | P&F         | 38          | Area                | m <sup>2</sup>       | 40                     | SS 304L  | 8                    |
| Absorption | E      | Intercooler              | P&F         | 326         | Area                | m <sup>2</sup>       | 34                     | SS 304L  | 20                   |
| Absorption | P      | DCC Circulating Pump     | Centrifugal | 174         | Flow                | L/s                  | 4.4                    | SS 304L  | 39                   |
| Absorption | P      | Amine Water Wash Pump    | Centrifugal | 25          | Flow                | L/s                  | 4                      | SS 304L  | 12                   |
| Absorption | P      | Rich Amine Pump          | Centrifugal | 206         | Flow                | L/s                  | 6                      | SS 304L  | 46                   |
| Absorption | P      | Intercooler Pump         | Centrifugal | 203         | Flow                | L/s                  | 3.4                    | SS 304L  | 45                   |
| Absorption | T      | Direct Contact Cooler    | Vertical    | 18,324      | Shell Mass          | kg                   | 2                      | SS 304L  | 282                  |

|                      |    |                                         |               |         |            |                |     |          |       |
|----------------------|----|-----------------------------------------|---------------|---------|------------|----------------|-----|----------|-------|
| Absorption           | T  | Absorber                                | Vertical      | 33,094  | Shell Mass | kg             | 1.9 | SS 30 4L | 401   |
| Compressions         | C  | CO <sub>2</sub> Compression Package     | Compressor    | 31,950  | Duty       | kW             | -   | SS 30 4L | 2,426 |
| Compressions         | P  | CO <sub>2</sub> Product Pump            | Centrifugal   | 440     | Flow       | L/s            | -   | SS 30 4L | 101   |
| Compressions         | PK | Molecular Sieve Package for Dehydration | 304SS Packing | 19      | Volume     | m <sup>3</sup> | -   | CS       | 62    |
| Regeneration         | E  | Lean/Rich Heat Exchanger                | P&F           | 14,500  | Area       | m <sup>2</sup> | 6   | SS 31 6L | 715   |
| Regeneration         | E  | Lean Amine Cooler                       | P&F           | 405     | Area       | m <sup>2</sup> | 6   | SS 31 6L | 26    |
| Regeneration         | E  | Reflux Condenser                        | S&T           | 2,765   | Area       | m <sup>2</sup> | 6   | SS 31 6L | 342   |
| Regeneration         | E  | Stripper Reboiler                       | Kettle        | 13,025  | Area       | m <sup>2</sup> | 5.3 | SS 31 6L | 1,442 |
| Regeneration         | P  | Lean Amine Make-up Pump                 | Centrifugal   | 0       | Flow       | L/s            | 8.6 | SS 30 4L | 9     |
| Regeneration         | P  | Lean Amine Pump                         | Centrifugal   | 1,326   | Flow       | L/s            | 4.8 | SS 31 6L | 290   |
| Regeneration         | P  | Stripper Reflux Pump                    | Centrifugal   | 46      | Flow       | L/s            | 8.3 | SS 30 4L | 15    |
| Regeneration         | P  | Condensate Return Pump                  | Centrifugal   | 199     | Flow       | L/s            | 10  | SS 31 6L | 44    |
| Regeneration         | T  | Stripper                                | Vertical      | 336,291 | Shell Mass | kg             | 6   | SS 31 6L | 2,498 |
| Regeneration         | TK | Amine Storage Tank                      | Vertical      | 669,658 | Shell Mass | kg             | 1.8 | CS       | 3,806 |
| Regeneration         | TK | CO <sub>2</sub> Reflux Accumulator      | Vertical      | 74,177  | Shell Mass | kg             | 2.8 | SS 31 6L | 652   |
| Regeneration         | TK | LP Condensate Separator                 | Horizontal    | 2,107   | Shell Mass | kg             | 5.1 | CS       | 25    |
| Regeneration         | TK | LP Condensate Separator                 | Horizontal    | 13,148  | Shell Mass | kg             | 2.7 | CS       | 136   |
| Cooling Tower        | CT | Cooling Tower & Pumps                   | -             | 694     | Flow       | L/s            | -   | CS       | 357   |
| Wastewater Treatment | TK | Wastewater Treatment                    | Cone Roof     | 10,603  | Capacity   | m <sup>3</sup> | -   | CS       | 472   |

1126

1127 Table S24. Selected Equipment Cost for Common Plant

| Letter | Type     | Material | Type of Size Metric | Unit for Size | D <sub>L</sub> | D <sub>H</sub> | a    | b   | r  |
|--------|----------|----------|---------------------|---------------|----------------|----------------|------|-----|----|
| T      | Vertical | SS30     | Shell Mass          | kg            | 90             | 1242           | -100 | 600 | 0. |

|    |                                  |            |            |                   |         |            |                |          |         |
|----|----------------------------------|------------|------------|-------------------|---------|------------|----------------|----------|---------|
|    |                                  | 4L         |            |                   |         | 00         |                |          | 6       |
| T  | Horizontal                       | SS30<br>4L | Shell Mass | kg                | 17<br>0 | 1140<br>00 | -<br>1500<br>0 | 560      | 0.<br>6 |
| C  | Compressor                       | SS30<br>4L | Duty       | kW                | 13<br>2 | 2900<br>0  | 8400           | 310<br>0 | 0.<br>6 |
| C  | Blower                           | SS30<br>4L | Flow       | m <sup>3</sup> /h | 20<br>0 | 5000       | 400            | 27       | 0.<br>8 |
| E  | P&F                              | SS30<br>4L | Area       | m <sup>2</sup>    | 1       | 180        | 1100           | 850      | 0.<br>4 |
| E  | Kettle                           | SS30<br>4L | Area       | m <sup>2</sup>    | 10      | 500        | 1400<br>0      | 83       | 1       |
| E  | S&T                              | SS30<br>4L | Area       | m <sup>2</sup>    | 10      | 1000       | 1000<br>0      | 88       | 1       |
| P  | Centrifugal                      | SS30<br>4L | Flow       | L/s               | 0.<br>2 | 500        | 3300           | 48       | 1.<br>2 |
| PK | 304SS Packing                    | SS30<br>4L | Volume     | m <sup>3</sup>    | 0       | 1000<br>00 | 0              | 320<br>0 | 1       |
| PK | Packaged Mechanical Refrigerator | SS30<br>4L | Duty       | kW                | 50      | 1500       | 4900           | 720      | 0.<br>9 |
| A  | -                                | SS30<br>4L | Area       | m <sup>2</sup>    | 10      | 500        | 1300<br>0      | 95       | 1       |
| U  | -                                | SS30<br>4L | Flow       | L/s               | 10<br>0 | 1000<br>0  | 6100<br>0      | 650      | 0.<br>9 |
| TK | Cone Roof                        | SS30<br>4L | Capacity   | m <sup>3</sup>    | 10      | 4000<br>0  | 5700           | 700      | 0.<br>7 |

1128

1129 Table S25. Equipment Cost Comparison between the Reference Configuration and Literature Data (2019)

| Item                           | Reference Configuration | Base Case 01-01           |
|--------------------------------|-------------------------|---------------------------|
| Flue Gas Flow Rate, t/h        | 286                     | 317                       |
| CO <sub>2</sub> Flow Rate, t/h | 49                      | 42.3                      |
| Sections                       | Calculated Cost, k\$    | Base Case 01-01 Cost, k\$ |
| Absorber                       | 7,166                   | 18,550                    |
| Regenerator                    | 11,784                  | 7,950                     |
| Compression                    | 3,286                   | 4,685                     |
| Cooling Tower                  | 453                     | 2,353                     |
| Wastewater Treatment           | 599                     | 869                       |

1130

1131 Table S26. Equipment Cost Estimation Parameters (2)

| Process Unit         | Capacity Parameter       | Parameter Unit | Exponent |
|----------------------|--------------------------|----------------|----------|
| Absorber             | Flue gas mass rate       | t/h            | 1.8      |
| Stripper             | CO <sub>2</sub> flowrate | t/h            | 0.9      |
| Compressor           | CO <sub>2</sub> flowrate | t/h            | 0.75     |
| Interconnection      | CO <sub>2</sub> flowrate | t/h            | 1        |
| Cooling tower        | Number of cells          | Unit           | 0.87     |
| Wastewater treatment | Wastewater inlet         | t/h            | 0.75     |

1132

1133 Table S27. Extrapolated Chemical Engineering Plant Cost Index (CEPCI) (61)

| Year | CEPCI |
|------|-------|
| 2019 | 607.5 |
| 2035 | 769.7 |
| 2050 | 915.7 |

1134

1135 Table S28. Parameters for Carbon Prices Generation from McKeller (45).

| Item                 | KPI   |
|----------------------|-------|
| Drift, $\mu$         | 0.047 |
| Volatility, $\sigma$ | 0.05  |

1136

1137 Table S29. Maximum, Minimum and Average Values for Simulated Carbon Price Trajectories

| Date | Max_price | Iteration_Max | Min_price | Iteration_Min | Mean_price |
|------|-----------|---------------|-----------|---------------|------------|
| 2019 | 27.8      | Run1          | 27.8      | Run1          | 27.8       |
| 2020 | 28.4      | Run1          | 28.4      | Run1          | 28.4       |
| 2021 | 63        | Run1          | 63        | Run1          | 63         |
| 2022 | 85.3      | Run1          | 85.3      | Run1          | 85.3       |
| 2023 | 106       | Run5560       | 89.6      | Run5560       | 97         |
| 2024 | 118       | Run8392       | 84.2      | Run8392       | 101        |
| 2025 | 130       | Run8392       | 84.9      | Run8392       | 105        |
| 2026 | 146       | Run407        | 82.9      | Run407        | 109        |
| 2027 | 156       | Run407        | 83.6      | Run407        | 113        |
| 2028 | 166       | Run407        | 83.7      | Run407        | 118        |
| 2029 | 176       | Run407        | 83.6      | Run407        | 123        |
| 2030 | 184       | Run7281       | 84.2      | Run7281       | 128        |
| 2031 | 197       | Run1752       | 84.4      | Run1752       | 133        |
| 2032 | 215       | Run1752       | 86.3      | Run1752       | 138        |
| 2033 | 231       | Run1504       | 86.8      | Run1504       | 144        |
| 2034 | 256       | Run1504       | 92.4      | Run1504       | 150        |
| 2035 | 269       | Run1504       | 91.3      | Run1504       | 156        |
| 2036 | 276       | Run1504       | 97.6      | Run1504       | 162        |
| 2037 | 291       | Run1504       | 99.2      | Run1504       | 169        |
| 2038 | 327       | Run9969       | 100       | Run9969       | 176        |
| 2039 | 366       | Run9969       | 103       | Run9969       | 183        |
| 2040 | 380       | Run9969       | 106       | Run9969       | 190        |
| 2041 | 374       | Run9969       | 107       | Run9969       | 198        |
| 2042 | 380       | Run9969       | 111       | Run9969       | 206        |
| 2043 | 420       | Run6425       | 110       | Run6425       | 215        |
| 2044 | 433       | Run6425       | 113       | Run6425       | 223        |

|      |     |         |     |         |     |
|------|-----|---------|-----|---------|-----|
| 2045 | 459 | Run9969 | 112 | Run9969 | 232 |
| 2046 | 509 | Run8011 | 122 | Run8011 | 242 |
| 2047 | 530 | Run8011 | 125 | Run8011 | 252 |
| 2048 | 559 | Run8011 | 130 | Run8011 | 262 |
| 2049 | 573 | Run5400 | 131 | Run5400 | 273 |
| 2050 | 584 | Run9969 | 134 | Run9969 | 284 |

1138

1139 Table S30. Summary of Individual Refinery Operational Changes Since 1999

| Operation | Size |                 |                 |                  |         | PADD |     |     |     |     | Configurations |     |     |     |     |     |     |
|-----------|------|-----------------|-----------------|------------------|---------|------|-----|-----|-----|-----|----------------|-----|-----|-----|-----|-----|-----|
|           | <999 | 10000< & <49999 | 50000< & <99999 | 99999< & <199999 | <200000 | 1    | 2   | 3   | 4   | 5   | 0              | 1   | 2   | 3   | 4   | 5   | 6   |
| Shut down | 10   | 17              | 10              | 4                | 0       | 8    | 5   | 12  | 1   | 15  | 26             | 6   | 2   | 1   | 2   | 2   | 2   |
| No Change | 121  | 490             | 499             | 509              | 468     | 183  | 407 | 760 | 240 | 479 | 397            | 495 | 907 | 206 | 425 | 773 | 433 |
| New Build | 0    | 3               | 3               | 1                | 0       | 0    | 1   | 3   | 0   | 3   | 3              | 0   | 2   | 0   | 0   | 1   | 1   |
| Expansion | 8    | 68              | 107             | 120              | 153     | 27   | 106 | 195 | 49  | 79  | 47             | 95  | 13  | 53  | 100 | 93  | 19  |
| Shrink    | 3    | 27              | 36              | 52               | 51      | 9    | 29  | 72  | 15  | 44  | 16             | 24  | 84  | 17  | 38  | 95  | 7   |

1140

1141 Table S31. Estimated Annual GHG Emissions by Direct Combustion of Transportation Fuels

| Year | Fuel Demand Scenario | Gasoline | Jet Fuel | Diesel | Fuel Oil | Total Emissions | Total Demands |
|------|----------------------|----------|----------|--------|----------|-----------------|---------------|
| 2019 | BL                   | 1180     | 262      | 627    | 13.4     | 2090            | 5540          |
| 2035 | HD35                 | 1090     | 476      | 155    | 27.3     | 1750            | 4710          |
| 2035 | MD35                 | 746      | 441      | 195    | 27.3     | 1410            | 3740          |
| 2035 | LD35                 | 690      | 397      | 195    | 27.3     | 1310            | 3470          |
| 2050 | HD50                 | 1020     | 506      | 147    | 32.4     | 1700            | 4580          |
| 2050 | MD50                 | 480      | 421      | 240    | 32.4     | 1170            | 3040          |
| 2050 | LD50                 | 259      | 296      | 240    | 32.4     | 827             | 2100          |

1142

1143 Table S32. CO<sub>2</sub> Avoidance Cost Range for Carbon Capture on Different Locations from SMR

| Scenario             | Year | SMR Capture Locations | Max Avoid Cost, \$/t | Min Avoid Cost, \$/t |
|----------------------|------|-----------------------|----------------------|----------------------|
| Low Fuel Demand (LD) | 2035 | PSA inlet             | 3030                 | 95.6                 |
| Low Fuel Demand (LD) | 2035 | PSA outlet            | 2784                 | 78.1                 |
| Low Fuel Demand (LD) | 2035 | Furnace outlet        | 2925                 | 109                  |
| Low Fuel Demand (LD) | 2050 | PSA inlet             | 2883                 | 95.0                 |
| Low Fuel Demand (LD) | 2050 | PSA outlet            | 2656                 | 78.2                 |

|                       |      |                |      |      |
|-----------------------|------|----------------|------|------|
| Low Fuel Demand (LD)  | 2050 | Furnace outlet | 2800 | 107  |
| Med. Fuel Demand (MD) | 2035 | PSA inlet      | 1850 | 92.8 |
| Med. Fuel Demand (MD) | 2035 | PSA outlet     | 1598 | 75.7 |
| Med. Fuel Demand (MD) | 2035 | Furnace outlet | 1881 | 106  |
| Med. Fuel Demand (MD) | 2050 | PSA inlet      | 881  | 94.8 |
| Med. Fuel Demand (MD) | 2050 | PSA outlet     | 811  | 77.6 |
| Med. Fuel Demand (MD) | 2050 | Furnace outlet | 853  | 107  |
| High Fuel Demand (HD) | 2035 | PSA inlet      | 1150 | 92.3 |
| High Fuel Demand (HD) | 2035 | PSA outlet     | 1056 | 75.2 |
| High Fuel Demand (HD) | 2035 | Furnace outlet | 1110 | 105  |
| High Fuel Demand (HD) | 2050 | PSA inlet      | 1122 | 92.3 |
| High Fuel Demand (HD) | 2050 | PSA outlet     | 1030 | 75.3 |
| High Fuel Demand (HD) | 2050 | Furnace outlet | 1085 | 105  |

1144

1145

1146 **Datasets**

1147 Dataset S1. CO<sub>2</sub> Avoidance Cost of Carbon Capture for Selected Individual/Grouped Process Units in

1148 Various Transportation Fuel Demand & Crude Quality Scenarios.

1149 Dataset S2. CO<sub>2</sub> Avoidance Cost of Carbon Capture for Combined Stacks in Selected Deep Conversion

1150 Refineries under Selected Transportation Fuel Demand & Crude Quality Scenarios.

1151 Dataset S3. Monte Carlo Results for Expected Present Value for Selected Individual Refineries under

1152 Different Fuel Demand Scenarios

1153 Dataset S4. Blended Crude Proxies for Different Crude Quality Scenarios in PRELIM Format

1154 Dataset S5. Monte Carlo Simulation Results for the Probability of Different Decisions Made by Individual

1155 Refineries.

1156

1157 **SI References**

1158

- 1159 1. E. T. A. R. G. University of Calgary, Petroleum Refinery Lifecycle Inventory  
1160 Model (PRELIM) v1.6. (2022). Deposited 2022.
- 1161 2. J. Gale, “Understanding the cost of retrofitting CO<sub>2</sub> capture to an integrated oil  
1162 refinery” (International Energy Agency, 2017).
- 1163 3. G. Collodi, *et al.*, Techno-economic evaluation of SMR based standalone  
1164 (merchant) hydrogen plant with CCS. *IT Report, Editor* (2017).
- 1165 4. F. El-Mahallawy, S.-D. Habik, *Fundamentals and technology of combustion*  
1166 (Elsevier, 2002).
- 1167 5. R. James, Cost and Performance Baseline for Fossil Energy Plants Volume 1:  
1168 Bituminous Coal and Natural Gas to Electricity. **1**.
- 1169 6. A. J. Kidnay, W. R. Parrish, FUNDAMENTALS of NATURAL GAS  
1170 PROCESSING. (2006).
- 1171 7. CO<sub>2</sub> abatement in oil refineries: Fired Heaters.
- 1172 8. N. Maruoka, H. Purwanto, T. Akiyama, Exergy Analysis of Methane Steam  
1173 Reformer Utilizing Steelmaking Waste Heat. *ISIJ Int.* **50**, 1311–1318 (2010).
- 1174 9. M. Wang, H. Lee, J. Molburg, Allocation of energy use in petroleum refineries to  
1175 petroleum products: Implications for Life-Cycle energy use and emission inventory  
1176 of petroleum transportation fuels. *Int J LCA* **9**, 34–44 (2004).
- 1177 10. L. Brickett, “Carbon Capture Program: Carbon Dioxide Capture Handbook” (US  
1178 DOE/NETL, 2015).
- 1179 11. T. T. Mai, *et al.*, “Electrification Futures Study: Scenarios of Electric Technology  
1180 Adoption and Power Consumption for the United States” (2018).
- 1181 12. H. Kim, “Refinery GHG Emissions of US, Canada and EU from 2019 to 2050: An  
1182 Exploration of Decarbonization Scenarios,” University of Calgary, Calgary,  
1183 Alberta, Canada. (2023).
- 1184 13. Total Energy Monthly Data - U.S. Energy Information Administration (EIA).  
1185 Available at: <https://www.eia.gov/totalenergy/data/monthly/index.php> [Accessed 27  
1186 April 2023].
- 1187 14. G. Cooney, *et al.*, Updating the U.S. Life Cycle GHG Petroleum Baseline to 2014  
1188 with Projections to 2040 Using Open-Source Engineering-Based Models. *Environ.*  
1189 *Sci. Technol.* **51**, 977–987 (2017).

- 1190 15. U.S. Refinery Crude Oil Input Qualities. Available at:  
1191 [https://www.eia.gov/dnav/pet/pet\\_pnp\\_crq\\_dcu\\_nus\\_m.htm](https://www.eia.gov/dnav/pet/pet_pnp_crq_dcu_nus_m.htm) [Accessed 27 April  
1192 2023].
- 1193 16. Company Level Imports. Available at:  
1194 <https://www.eia.gov/petroleum/imports/companylevel/> [Accessed 27 April 2023].
- 1195 17. W. L. Nelson, *Guide to refinery operating cost (process costimating)* (1976).
- 1196 18. W. L. Nelson, *How the Nelson refinery construction cost indexes evolved* (1976).
- 1197 19. W. L. Nelson, *Here's how operating cost indexes are computed* (1977).
- 1198 20. 2021 Worldwide Refining Capacity Summary. *Oil & Gas Journal* (2022). Available  
1199 at: [https://www.ogj.com/ogj-survey-downloads/worldwide-](https://www.ogj.com/ogj-survey-downloads/worldwide-refining/document/14233364/2021-worldwide-refining-capacity-summary)  
1200 [refining/document/14233364/2021-worldwide-refining-capacity-summary](https://www.ogj.com/ogj-survey-downloads/worldwide-refining/document/14233364/2021-worldwide-refining-capacity-summary)  
1201 [Accessed 27 April 2023].
- 1202 21. M. J. Kaiser, A review of refinery complexity applications. *Pet. Sci.* **14**, 167–194  
1203 (2017).
- 1204 22. U.S. Refinery Yield. Available at:  
1205 [https://www.eia.gov/dnav/pet/pet\\_pnp\\_pct\\_dc\\_nus\\_pct\\_m.htm](https://www.eia.gov/dnav/pet/pet_pnp_pct_dc_nus_pct_m.htm) [Accessed 27 April  
1206 2023].
- 1207 23. U.S. Refinery & Blender Net Input. Available at:  
1208 [https://www.eia.gov/dnav/pet/pet\\_pnp\\_inpt\\_dc\\_nus\\_mbbl\\_m.htm](https://www.eia.gov/dnav/pet/pet_pnp_inpt_dc_nus_mbbl_m.htm) [Accessed 27  
1209 April 2023].
- 1210 24. U.S. Refinery and Blender Net Production. Available at:  
1211 [https://www.eia.gov/dnav/pet/pet\\_pnp\\_refp\\_dc\\_nus\\_mbbl\\_m.htm](https://www.eia.gov/dnav/pet/pet_pnp_refp_dc_nus_mbbl_m.htm) [Accessed 27  
1212 April 2023].
- 1213 25. U.S. Refinery Utilization and Capacity. Available at:  
1214 [https://www.eia.gov/dnav/pet/pet\\_pnp\\_unc\\_dcu\\_nus\\_m.htm](https://www.eia.gov/dnav/pet/pet_pnp_unc_dcu_nus_m.htm) [Accessed 28 April  
1215 2023].
- 1216 26. A. A. V. Julio, R. Castro-Amoedo, F. Maréchal, A. M. González, J. C. Escobar  
1217 Palacio, Exergy and economic analysis of the trade-off for design of post-  
1218 combustion CO<sub>2</sub> capture plant by chemical absorption with MEA. *Energy* **280**,  
1219 128004 (2023).
- 1220 27. D. Danaci, M. Bui, C. Petit, N. Mac Dowell, En Route to Zero Emissions for Power  
1221 and Industry with Amine-Based Post-combustion Capture. *Environ. Sci. Technol.*  
1222 **55**, 10619–10632 (2021).
- 1223 28. R. A. Y. Sinnott, *Chemical engineering design* (Elsevier, 2014).

- 1224 29. E. S. Rubin, Understanding the pitfalls of CCS cost estimates. *International Journal*  
1225 *of Greenhouse Gas Control* **10**, 181–190 (2012).
- 1226 30. U.S. Department of Energy, Enhanced Oil Recovery. (2026).
- 1227 31. I. E. Agency, *Putting CO 2 to Use: Creating Value from Emissions* (International  
1228 Energy Agency (IEA) Paris, 2019).
- 1229 32. E. and C. C. Canada, The federal carbon pollution pricing benchmark. (2021).  
1230 Available at: [https://www.canada.ca/en/environment-climate-  
1233 pollution-pricing-federal-benchmark-information.html](https://www.canada.ca/en/environment-climate-<br/>1231 change/services/climate-change/pricing-pollution-how-it-will-work/carbon-<br/>1232 pollution-pricing-federal-benchmark-information.html) [Accessed 20 February  
2026].
- 1234 33. Alberta TIER prices jump 25% after MOU, but outlook remains uncertain. *S&P*  
1235 *Global Energy* (2025). Available at: [https://www.spglobal.com/energy/en/news-  
research/latest-news/electric-power/120325-alberta-tier-prices-jump-25-after-mou-  
but-outlook-remains-uncertain](https://www.spglobal.com/energy/en/news-<br/>1236 research/latest-news/electric-power/120325-alberta-tier-prices-jump-25-after-mou-<br/>1237 but-outlook-remains-uncertain) [Accessed 25 February 2026].
- 1238 34. S. M. Ross, Variations on Brownian motion. *Introduction to Probability Models*  
1239 612–614 (2014).
- 1240 35. J. C. Cox, S. A. Ross, M. Rubinstein, Option pricing: A simplified approach.  
1241 *Journal of Financial Economics* **7**, 229–263 (1979).
- 1242 36. Y. He, *Real options in the energy markets* (s.n.), 2007).
- 1243 37. S. Khan, S. Khan, Bumpy road ahead for US gasoline demand and energy transition.  
1244 *Reuters* (2023).
- 1245 38. T. E. Copeland, V. Antikarov, *Real Options: A Practitioner's Guide* (Texere, 2001).
- 1246 39. S. Nalley, A. LaRose, Annual energy outlook 2022 (AEO2022). *Energy Information*  
1247 *Agency* **23** (2022).
- 1248 40. M. Zhang, L. Liu, Q. Wang, D. Zhou, Valuing investment decisions of renewable  
1249 energy projects considering changing volatility. *Energy Economics* **92**, 104954  
1250 (2020).
- 1251 41. J. A. Schachter, P. Mancarella, A critical review of Real Options thinking for  
1252 valuing investment flexibility in Smart Grids and low carbon energy systems.  
1253 *Renewable and Sustainable Energy Reviews* **56**, 261–271 (2016).
- 1254 42. World Bank, Carbon Pricing Dashboard. *Carbon Pricing Dashboard* (2023).  
1255 Available at: <https://carbonpricingdashboard.worldbank.org/compliance/price>  
1256 [Accessed 22 May 2024].

- 1257 43. B. R. Cobb, J. M. Charnes, Real Options Volatility Estimation With Correlated  
1258 Inputs. *The Engineering Economist* **49**, 119–137 (2004).
- 1259 44. P. S. Reinelt, D. W. Keith, Carbon Capture Retrofits and the Cost of Regulatory  
1260 Uncertainty. *The Energy Journal* **28**, 101–128 (2007).
- 1261 45. J. M. McKellar, J. A. Bergerson, J. Kettunen, H. L. MacLean, Predicting Project  
1262 Environmental Performance under Market Uncertainties: Case Study of Oil Sands  
1263 Coke. *Environ. Sci. Technol.* **47**, 5979–5987 (2013).
- 1264 46. L. E. Brandão, J. S. Dyer, Decision Analysis and Real Options: A Discrete Time  
1265 Approach to Real Option Valuation. *Ann Oper Res* **135**, 21–39 (2005).
- 1266 47. S. Jiang, Survival in the U.S. petroleum refining industry. *Journal of Applied  
1267 Statistics* **39**, 1505–1530 (2012).
- 1268 48. M.-Y. Chen, The survival and growth of US petroleum refineries in response to  
1269 changes in market conditions. *The Journal of Energy and Development* **29**, 115–146  
1270 (2003).
- 1271 49. D. Mullen, L. Herraiz, J. Gibbins, M. Lucquiaud, On the cost of zero carbon  
1272 hydrogen: A techno-economic analysis of steam methane reforming with carbon  
1273 capture and storage. *International Journal of Greenhouse Gas Control* **126**, 103904  
1274 (2023).
- 1275 50. Y. Khojasteh Salkuyeh, B. A. Saville, H. L. MacLean, Techno-economic analysis  
1276 and life cycle assessment of hydrogen production from natural gas using current and  
1277 emerging technologies. *International Journal of Hydrogen Energy* **42**, 18894–18909  
1278 (2017).
- 1279 51. D. Bonaquist, “Analysis of CO<sub>2</sub> Emissions, Reductions, and Capture for Large-  
1280 Scale Hydrogen Production Plants” (Praxair, 2010).
- 1281 52. R. G. Lemus, J. M. Martínez Duart, Updated hydrogen production costs and parities  
1282 for conventional and renewable technologies. *International Journal of Hydrogen  
1283 Energy* **35**, 3929–3936 (2010).
- 1284 53. J. C. Meerman, *et al.*, Techno-economic assessment of CO<sub>2</sub> capture at steam  
1285 methane reforming facilities using commercially available technology. *International  
1286 Journal of Greenhouse Gas Control* **9**, 160–171 (2012).
- 1287 54. I. Lindsay, C. Lowe, S. Reddy, M. Bhakta, S. Balkenende, Designing a climate  
1288 friendly hydrogen plant. *Energy Procedia* **1**, 4095–4102 (2009).
- 1289 55. F. Pruvost, S. Cloete, C. Arnaiz Del Pozo, A. Zaabout, Blue, green, and turquoise  
1290 pathways for minimizing hydrogen production costs from steam methane reforming  
1291 with CO<sub>2</sub> capture. *Energy Conversion and Management* **274**, 116458 (2022).

- 1292 56. M. H. Ali Khan, *et al.*, A framework for assessing economics of blue hydrogen  
1293 production from steam methane reforming using carbon capture storage &  
1294 utilisation. *International Journal of Hydrogen Energy* **46**, 22685–22706 (2021).
- 1295 57. G. Lozza, P. Chiesa, Natural Gas Decarbonization to Reduce CO2 Emission From  
1296 Combined Cycles—Part II: Steam-Methane Reforming. *Journal of Engineering for*  
1297 *Gas Turbines and Power* **124**, 89–95 (2002).
- 1298 58. P. L. Spath, M. K. Mann, “Life Cycle Assessment of Hydrogen Production via  
1299 Natural Gas Steam Reforming” (2000).
- 1300 59. National Energy Technology Laboratory, “Carbon Dioxide Transport and Storage  
1301 Costs in NETL Studies” (U.S. Department of Energy, National Energy Technology  
1302 Laboratory (NETL), 2019).
- 1303 60. Global CCS Institute, “The Cost of CO2 Storage” (Global CCS Institute, 2025).
- 1304 61. D. Leeson, N. Mac Dowell, N. Shah, C. Petit, P. S. Fennell, A Techno-economic  
1305 analysis and systematic review of carbon capture and storage (CCS) applied to the  
1306 iron and steel, cement, oil refining and pulp and paper industries, as well as other  
1307 high purity sources. *International Journal of Greenhouse Gas Control* **61**, 71–84  
1308 (2017).
- 1309
